# Supplementary material for: Design, synthesis, and evaluation of chiral thiophosphorus acids as organocatalysts
Source: publisher site journal article supplement (doi:10.3762/bjoc.18.154), 2022-10-17

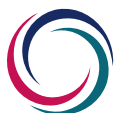

## Supporting Information

for

### Design, synthesis, and evaluation of chiral thiophosphorus acids as organocatalysts

Karen R. Winters and Jean-Luc Montchamp

*Beilstein J. Org. Chem.* **2022**, *18*, 1471–1478. [doi:10.3762/bjoc.18.154](https://doi.org/10.3762/bjoc.18.154)

### Experimental procedures and copies of spectra

| <b>Table of contents</b>      | <b>Page</b> |
|-------------------------------|-------------|
| General chemistry .....       | S2          |
| Reagents and solvents .....   | S2          |
| Experimental procedures ..... | S3          |
| HPLC chromatograms .....      | S17         |
| NMR spectra .....             | S22         |

## General chemistry.

$^1\text{H}$  NMR spectra were recorded on a 400 MHz Bruker Avance spectrometer. Chemical shifts for  $^1\text{H}$  NMR spectra (in parts per million) are relative to internal tetramethylsilane ( $\text{Me}_4\text{Si}$ ,  $\delta = 0.00$  ppm) with deuterated chloroform.  $^{13}\text{C}\{^1\text{H}\}$  NMR spectra were recorded at 101 MHz. Chemical shifts for  $^{13}\text{C}\{^1\text{H}\}$  NMR spectra are reported (in parts per million) relative to  $\text{CDCl}_3$  ( $\delta = 77.0$  ppm).  $^{31}\text{P}$  NMR spectra were recorded at 162 MHz, and chemical shifts reported (in parts per million) are relative to external 85% phosphoric acid ( $\delta = 0.0$  ppm). Flash chromatography experiments were carried out on silica gel premium Rf grade (40–75  $\mu\text{m}$ ). Ethyl acetate/hexane or ethyl acetate/methanol mixtures were used as the eluent for chromatographic purifications. TLC plates were visualized by UV or immersion in permanganate potassium (3 g of  $\text{KMnO}_4$ , 20 g of  $\text{K}_2\text{CO}_3$ , 5 mL of 5% aq NaOH, 300 mL of water) followed by heating. Chiral HPLC analyses were recorded on an Agilent 1200 Series HPLC system. Chiral HPLC resolutions were done with an (*S,S*)-Whelk-01 Column (250  $\times$  4.6 mm, 5  $\mu\text{m}$ ) from Regis Technologies or CHIRALCEL OD-H from Daicel, using hexanes/isopropanol mixtures as the mobile phase. Mass spectrometry was provided by Louisiana State University Mass Spectrometry Resource. High-resolution mass spectra (HRMS) were obtained by electrospray ionization using a TOF analyzer.

## Reagent and solvents.

All starting materials were purchased from commercial sources and used as received, unless otherwise noted. Anhydrous THF and DMF were purchased and used as received. The solvents were distilled under  $\text{N}_2$  and dried according to standard procedures ( $\text{CH}_3\text{CN}$ , toluene, and dichloromethane from  $\text{CaH}_2$ ).

## Experimental procedures.

### *N*-Phenyl tryptophol (**6**)

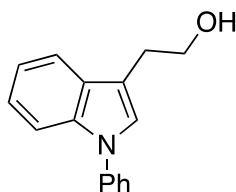

To a screw-cap test tube was added CuI (0.05 equiv, 1.5 mmol), tryptophol (**5**, 1.0 equiv, 31.0 mmol), K<sub>3</sub>PO<sub>4</sub> (2.1 equiv, 65.1 mmol) and the vessel was evacuated and back-filled with nitrogen. Iodobenzene (1.2 equiv, 37.2 mmol), *trans*-*N*<sup>1</sup>,*N*<sup>2</sup>-dimethylcyclohexane-1,2-diamine (10 mol %, 3.1 mmol) and toluene (32 mL) were added under nitrogen. The reaction tube was sealed, and the contents were stirred, with heating from an oil bath at 110 °C overnight. The reaction mixture was cooled to ambient temperature, diluted with ethyl acetate (20 mL), and filtered through a plug of Celite, eluted with additional ethyl acetate (20 mL). The filtrate was concentrated under vacuum and the resulting residue was purified by column chromatography on silica gel (hexanes/ethyl acetate 95:05 to 50:50) to provide **6** as a colorless oil (7.3 g, 98%).  
<sup>1</sup>H NMR (400 MHz, CDCl<sub>3</sub>) δ 7.72 (ddd, *J* = 7.8, 1.4, 0.8 Hz, 1H), 7.62 (dt, *J* = 8.2, 0.9 Hz, 1H), 7.54 (d, *J* = 5.7 Hz, 4H), 7.44 – 7.33 (m, 1H), 7.31 – 7.28 (m, 2H), 7.27 – 7.19 (m, 1H), 4.00 (t, *J* = 6.4 Hz, 2H), 3.13 (td, *J* = 6.4, 0.9 Hz, 2H), 1.72 (s, 1H);  
<sup>13</sup>C NMR (101 MHz, CDCl<sub>3</sub>) δ 139.7, 136.3, 129.7, 128.9, 126.30, 126.28, 124.2, 122.7, 120.1, 119.2, 113.5, 110.7, 62.6, 28.7.

### *Methyl (2-(1-phenyl-1H-indol-3-yl)ethyl)-H-phosphonate (7)*

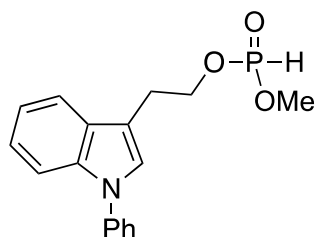

Synthesis of the *tert*-butylamine methyl phosphonate salt was made according to a known procedure.<sup>1</sup> To a solution of *tert*-butylamine methyl phosphonate salt (1.0 equiv, 1.7 mmol) in anhydrous CH<sub>2</sub>Cl<sub>2</sub> (22 mL) was added pivaloyl chloride (1.0 equiv, 1.7 mmol) at room temperature under nitrogen. After stirring for 1 h, **6** (1.0 equiv, 1.7 mmol) was added at room temperature and left to stir overnight. The mixture was washed with saturated aqueous NaHCO<sub>3</sub> (10 mL) and extracted with CH<sub>2</sub>Cl<sub>2</sub> (10 mL × 2). The combined extracts were washed with brine, dried over anhydrous MgSO<sub>4</sub>, filtered, and concentrated under vacuum. The residue was purified by column chromatography on silica gel (hexanes/ethyl acetate 8:2 to 6:4 to 2:8) to give **7** colorless oil (0.5 g, 89%). <sup>31</sup>P NMR (162 MHz, CDCl<sub>3</sub>) δ 9.25 (d); <sup>1</sup>H NMR (400 MHz, CDCl<sub>3</sub>) δ 7.73 – 7.69 (m, 1H), 7.68 – 5.93 (d, *J* = 698.2 Hz, 1H), 7.63 – 7.57 (m, 1H), 7.40 – 7.34 (m, 1H), 7.32 – 7.20 (m, 3H), 4.50 – 4.37 (m, 2H), 3.74 (d, *J* = 12.0 Hz, 3H), 3.28 (d, *J* = 0.9 Hz, 2H); <sup>13</sup>C NMR (101 MHz, CDCl<sub>3</sub>) δ 139.6, 136.0, 129.7, 128.7, 126.4 (d, *J* = 12.8 Hz), 124.2, 122.7, 120.3, 119.0, 112.2, 110.7, 65.6 (d, *J* = 6.2 Hz), 52.0 (d, *J* = 5.8 Hz), 26.6 (d, *J* = 6.0 Hz). HRMS (EI+) *m/z* [M + H]<sup>+</sup> calcd for C<sub>17</sub>H<sub>18</sub>NO<sub>3</sub>P 315.1019, found 316.1093.

*1-Methoxy-9-phenyl-3,4,9-trihydro[1,2]oxaphosphinino[3,4-b]indole 1-oxide (8)*

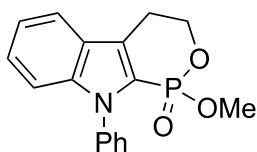

To a solution of **7** (1.0 equiv, 2.2 mmol) in acetic acid (15 mL) was added Mn(OAc)<sub>2</sub> (5 mol %, 0.111 mmol), MnO<sub>2</sub> (85% activated, 3.0 equiv, 6.6 mmol), and sodium acetate (3.0 equiv, 6.6 mmol). The suspension was stirred overnight at 70 °C under nitrogen. The reaction mixture was cooled to room temperature, diluted with ethyl acetate (20 mL) and a 0.1 M aqueous solution of Na<sub>2</sub>S<sub>2</sub>O<sub>4</sub> saturated with NaCl (20 mL) was added. The mixture was stirred for 5 min and the suspension was filtered

over Celite. The organic layer was washed with aqueous solutions of  $\text{Na}_2\text{S}_2\text{O}_4$  saturated with  $\text{NaCl}$  (20 mL  $\times$  2) and saturated  $\text{NaHCO}_3$  (20 mL  $\times$  5). The combined extracts were washed with brine, dried with  $\text{MgSO}_4$ , filtered, and concentrated under vacuum. The residue was purified by column chromatography on silica gel (hexanes/ethyl acetate 90:10 to 0:100) to give **8** as a colorless oil (0.3 g, 43%).  $^{31}\text{P}$  NMR (162 MHz,  $\text{CDCl}_3$ )  $\delta$  7.1 ppm (s);  $^1\text{H}$  NMR (400 MHz,  $\text{CDCl}_3$ )  $\delta$  7.66 – 7.61 (m, 3H), 7.57 (m, 2H), 7.51 – 7.43 (m, 1H), 7.42 – 7.29 (m, 2H), 7.24 (m, 1H), 4.82 – 4.57 (m, 2H), 3.48 (d,  $J$  = 11.6 Hz, 3H), 3.24 (dddd,  $J$  = 16.7, 6.7, 4.4, 2.7 Hz, 2H); HRMS (EI+)  $m/z$   $[\text{M} + \text{H}]^+$  calcd for  $\text{C}_{17}\text{H}_{16}\text{NO}_3\text{P}$  313.0862, found 314.0951.

*1-Methoxy-9-phenyl-3,4,9-trihydro[1,2]oxaphosphinino[3,4-b]indole 1-sulfide (9)*

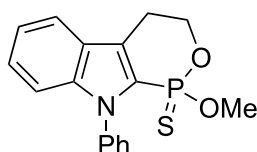

To a solution of **8** (1.0 equiv, 6.7 mmol) in anhydrous toluene (40 mL) was added Lawesson's Reagent (0.6 equiv, 4.0 mmol) under nitrogen. The solution was refluxed for 16 h, cooled to room temperature, and concentrated under vacuum. The residue was purified by column chromatography on silica gel (hexanes/ethyl acetate 98:02 to 80:20) to give **9** as a colorless oil (1.2 g, 54%).  $^{31}\text{P}$  NMR (162 MHz,  $\text{CDCl}_3$ )  $\delta$  67.8 ppm (s);  $^1\text{H}$  NMR (400 MHz,  $\text{CDCl}_3$ )  $\delta$  7.69 – 7.63 (m, 1H), 7.53 (m, 5H), 7.33 (dd,  $J$  = 8.6, 6.7 Hz, 1H), 7.23 (dd,  $J$  = 8.0, 6.3 Hz, 2H), 4.68 (dq,  $J$  = 17.6, 4.3 Hz, 2H), 3.66 (d,  $J$  = 14.5 Hz, 3H), 3.42 – 3.10 (m, 2H).

*1-Hydroxy-3,4,9-trihydro-[1,2]oxaphosphinino[3,4-b]indole 1-sulfide (1)*

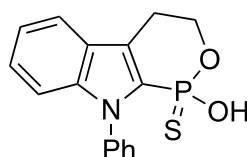

To a reaction tube was added **9** (1.0 equiv, 0.16 mmol) in anhydrous CH<sub>3</sub>CN (6 mL) and 1,4-diazabicyclo[2.2.2]octane (1.0 equiv, 0.16 mmol). The tube was placed in a synthesizer and stirred for 12 h at 85 °C under nitrogen. The solution was cooled to room temperature, acidified with 1 M HCl (10 mL) and extracted with CH<sub>2</sub>Cl<sub>2</sub> (10 mL × 2). The combined extracts were dried with MgSO<sub>4</sub>, filtered and condensed under vacuum to yield **1** (NMR yield: 100%). <sup>31</sup>P NMR (162 MHz, CDCl<sub>3</sub>) δ 49.0 ppm (s).

### 3-Allylindole (**10**)

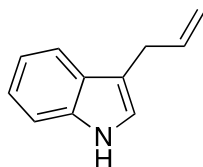

To a reaction tube was added indole (1 equiv, 20 mmol) and allyl alcohol (1.5 equiv, 30 mmol) in THF (90 mL). The tube was flushed with argon for 10 minutes. Next, Pd(PPh<sub>3</sub>)<sub>4</sub> (5 mol %, 1 mmol) and Et<sub>3</sub>B (30 mol %, 6 mmol, 1 M in THF) were added and flushed with argon for 10 minutes. The tube was sealed and brought to 50 °C in an oil bath for 16 h. The reaction mixture was then cooled to rt and diluted with ethyl acetate (40 mL). The solution was transferred to a separatory funnel and washed with a saturated aqueous solution of NaHCO<sub>3</sub> and brine. The organic layer was dried over MgSO<sub>4</sub>, filtered and concentrated under vacuum. The crude product was purified by column chromatography on silica gel (hexanes/ethyl acetate 95:5) to give **10** as a yellow oil (2.5 g, 80%). <sup>1</sup>H NMR (400 MHz, CDCl<sub>3</sub>) δ 7.83 – 7.76 (m, 2H), 7.45 – 7.27 (m, 3H), 7.01 (dt, *J* = 2.1, 1.0 Hz, 1H), 6.25 (ddt, *J* = 17.1, 10.0, 6.5 Hz, 1H), 5.44 – 5.12 (m, 2H), 3.74 – 3.65 (m, 2H); <sup>13</sup>C NMR (101 MHz, CDCl<sub>3</sub>) δ 137.5, 136.5, 127.5, 122.1, 121.9, 119.4, 119.3, 115.4, 114.5, 111.3, 30.0.

*Ethyl (3-(1H-indol-3-yl)propyl)phosphinate (11)*

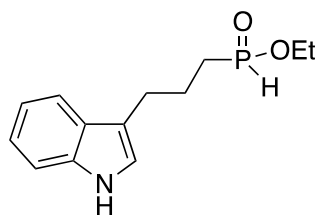

In a round-bottomed flask was added EtOP(O)H<sub>2</sub> (1.5 equiv, 47.7 mmol, 0.5 M in CH<sub>3</sub>CN), **10** (1 equiv, 31.8 mmol), Pd<sub>2</sub>dba<sub>3</sub>·CHCl<sub>3</sub> (0.5 mol %, 0.3 mmol), and xantphos (1.2 mol %, 0.38 mmol). The flask was flushed with argon for 10 min then brought to reflux for 18 h. After cooling to rt, the mixture was diluted with ethyl acetate (60 mL). The solution was transferred to a separatory funnel and washed with a saturated aqueous solution of NaHCO<sub>3</sub> and brine. The organic layer was dried over MgSO<sub>4</sub>, filtered, and concentrated under vacuum. The crude product was purified by column chromatography on silica gel (ethyl acetate/methanol 100:0 to 90:10) to give **11** as an oil (4.88 g, 63%). <sup>31</sup>P NMR (162 MHz, CDCl<sub>3</sub>) δ 39.2 (d, *J* = 528.3 Hz); <sup>1</sup>H NMR (400 MHz, CDCl<sub>3</sub>) δ 7.75 (dt, *J* = 526.7, 1.9 Hz, 1H), 7.61 (dt, *J* = 8.0, 1.0 Hz, 1H), 7.39 (dt, *J* = 8.1, 1.0 Hz, 1H), 7.21 (ddd, *J* = 8.2, 7.0, 1.3 Hz, 1H), 7.14 (ddd, *J* = 8.0, 7.0, 1.1 Hz, 1H), 6.99 (d, *J* = 2.4 Hz, 1H), 4.36 – 3.94 (m, 3H), 2.95 – 2.86 (m, 2H), 2.06 – 1.97 (m, 2H), 1.87 (dddd, *J* = 15.2, 9.3, 6.7, 3.9 Hz, 2H), 1.37 (d, *J* = 7.1 Hz, 3H); <sup>13</sup>C NMR (101 MHz, CDCl<sub>3</sub>) δ 136.4, 127.3, 122.1, 121.7, 119.3 (d, *J* = 54.9 Hz), 114.9, 111.2, 62.4 (d, *J* = 7.0 Hz), 28.9, 27.9, 25.8 (d, *J* = 16.5 Hz), 21.4 (d, *J* = 2.8 Hz), 16.3 (d, *J* = 6.2 Hz); HRMS (EI+) *m/z* [M + H]<sup>+</sup> calcd for C<sub>13</sub>H<sub>18</sub>NO<sub>2</sub>P 251.107, found 252.1148.

*1-Ethoxy-2,3,4,9-tetrahydrophosphinino[2,3-b]indole 1-oxide (12)*

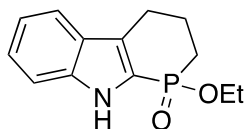



To a reaction tube was added **11** (1 equiv, 1.2 mmol), silver(I) acetate (3 equiv, 3.5 mmol) in DCE (8 mL) and flushed with argon for 10 min. The tube was brought to 90 °C in an oil bath for 18 h. The reaction mixture was then cooled to rt, diluted with DCM (15 mL) and filtered over Celite. The filtrate was concentrated under vacuum and the crude product purified by column chromatography on silica gel (hexanes/ethyl acetate 20:80 to 10:90) to afford **12** as a tan solid (0.2 g, 73%). <sup>31</sup>P NMR (162 MHz, CDCl<sub>3</sub>) δ 34.1 (s); <sup>1</sup>H NMR (400 MHz, CDCl<sub>3</sub>) δ 11.74 (d, *J* = 6.6 Hz, 1H), 7.67 – 7.53 (m, 2H), 7.36 – 7.25 (m, 1H), 7.14 (ddd, *J* = 8.1, 7.1, 1.0 Hz, 1H), 4.36 – 4.10 (m, 2H), 3.19 – 2.82 (m, 2H), 2.68 – 2.25 (m, 3H), 2.23 – 2.00 (m, 1H), 1.24 (t, *J* = 7.1 Hz, 3H); <sup>13</sup>C NMR (101 MHz, CDCl<sub>3</sub>) δ 138.8 (d, *J* = 11.6 Hz), 126.1 (d, *J* = 12.0 Hz), 125.7 (d, *J* = 15.0 Hz), 124.6, 123.5, 122.2, 120.1 – 119.3 (m), 112.7 (d, *J* = 1.4 Hz), 61.9 (d, *J* = 6.8 Hz), 27.5, 26.5, 22.6 (dd, *J* = 10.0, 5.0 Hz), 16.5 (d, *J* = 6.7 Hz); HRMS (EI+) *m/z* [M + H]<sup>+</sup> calcd for C<sub>13</sub>H<sub>16</sub>NO<sub>2</sub>P 249.0913, found 250.0990.

*1-Ethoxy-9-phenyl-2,3,4,9-tetrahydrophosphinino[2,3-b]indole 1-oxide (13a)*

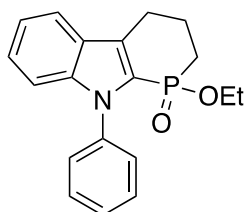

To a round-bottomed flask was added **12** (1 equiv, 4 mmol), iodobenzene (1.2 equiv, 4.8 mmol), K<sub>3</sub>PO<sub>4</sub> (2.1 equiv, 8.4 mmol), CuI (5 mol %, 0.2 mmol), and DMEDA (10 mol %, 0.4 mmol) in toluene (20 mL). The flask was flushed with argon for 10 min then the mixture was brought to reflux for 18 h. After cooling to rt, the solvent was evaporated under vacuum. The crude was dissolved in DCM and transferred to a separatory funnel. The organic layer was washed with NH<sub>4</sub>Cl (aq), then washed with brine. The organic layer was separated and dried with MgSO<sub>4</sub>, filtered, and concentrated under vacuum. The crude product was purified by column

chromatography on silica gel (hexanes/ethyl acetate 25:75) to afford the pure product **13a** as a colorless oil (1 g, 77%).  $^{31}\text{P}$  NMR (162 MHz,  $\text{CDCl}_3$ )  $\delta$  32.2 (s);  $^1\text{H}$  NMR (400 MHz,  $\text{CDCl}_3$ )  $\delta$  7.66 (t,  $J = 8.7$  Hz, 2H), 7.55 (t,  $J = 7.7$  Hz, 2H), 7.49 – 7.41 (m, 1H), 7.35 – 7.25 (m, 3H), 7.20 (ddd,  $J = 7.8, 6.3, 1.6$  Hz, 1H), 3.89 – 3.73 (m, 1H), 3.67 – 3.50 (m, 1H), 3.12 – 2.98 (m, 2H), 2.50 – 2.28 (m, 2H), 2.26 – 2.01 (m, 2H), 1.03 (d,  $J = 7.0$  Hz, 3H);  $^{13}\text{C}$  NMR (101 MHz,  $\text{CDCl}_3$ )  $\delta$  139.4 (d,  $J = 9.2$  Hz), 138.5, 129.2, 128.0, 127.8 (d,  $J = 8.1$  Hz), 127.6 (d,  $J = 3.8$  Hz), 126.5 (d,  $J = 12.5$  Hz), 126.2, 125.3, 120.4, 120.0 (d,  $J = 1.7$  Hz), 111.1, 60.9 (d,  $J = 6.2$  Hz), 28.4 (d,  $J = 99.1$  Hz), 23.1 (d,  $J = 4.0$  Hz), 21.8 (d,  $J = 5.8$  Hz), 16.4 (d,  $J = 6.2$  Hz); HRMS (EI+)  $m/z$   $[\text{M} + \text{H}]^+$  calcd for  $\text{C}_{19}\text{H}_{20}\text{NO}_2\text{P}$  325.1226, found 326.1303.

*1-Ethoxy-9-(p-nitrophenyl)-2,3,4,9-tetrahydrophosphinino[2,3-b]indole 1-oxide (13b)*

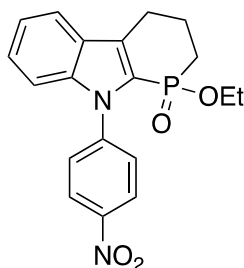

To a round-bottomed flask was added **12** (1 equiv, 1.5 mmol), iodo-nitrobenzene (1.2 equiv, 1.8 mmol),  $\text{K}_3\text{PO}_4$  (2.1 equiv, 3.1 mmol),  $\text{CuI}$  (5 mol %, 0.075 mmol), and DMEDA (10 mol %, 0.15 mmol) in toluene (10 mL). The flask was flushed with argon for 10 min then the mixture was brought to reflux for 18 h. After cooling to rt, the solvent was evaporated under vacuum. The crude was dissolved in DCM and transferred to a separatory funnel. The organic layer was washed with  $\text{NH}_4\text{Cl}$  (sat. aq), then washed with brine. The organic layer was separated and dried with  $\text{MgSO}_4$ , filtered, and concentrated under vacuum. The crude product was purified by column chromatography on silica gel (hexanes/ethyl acetate 25:75) to afford **13b** as a yellow solid (0.4 g, 73%).  $^{31}\text{P}$  NMR (162 MHz,  $\text{CDCl}_3$ )  $\delta$  32.2 (s);  $^1\text{H}$  NMR (400 MHz,  $\text{CDCl}_3$ )

$\delta$  8.47 – 8.38 (m, 2H), 7.97 – 7.89 (m, 2H), 7.67 (dt,  $J$  = 8.0, 1.1 Hz, 1H), 7.42 – 7.32 (m, 2H), 7.30 – 7.22 (m, 1H), 3.96 – 3.73 (m, 2H), 3.05 (td,  $J$  = 6.0, 3.1 Hz, 2H), 2.38 (s, 2H), 2.29 – 2.04 (m, 2H), 1.11 (t,  $J$  = 7.0 Hz, 3H);  $^{13}\text{C}$  NMR (101 MHz,  $\text{CDCl}_3$ )  $\delta$  146.4, 144.4, 138.8 (d,  $J$  = 8.8 Hz), 129.8 (d,  $J$  = 14.0 Hz), 127.8, 127.2 (d,  $J$  = 12.3 Hz), 126.9 (d,  $J$  = 137.5 Hz), 126.3, 124.8, 121.5, 120.4 (d,  $J$  = 1.5 Hz), 110.7 (d,  $J$  = 1.6 Hz), 61.1 (d,  $J$  = 6.0 Hz), 27.9 (d,  $J$  = 98.2 Hz), 23.1 (d,  $J$  = 4.1 Hz), 21.5 (d,  $J$  = 6.1 Hz), 16.5 (d,  $J$  = 5.9 Hz); HRMS (EI+)  $m/z$   $[\text{M} + \text{H}]^+$  calcd for  $\text{C}_{19}\text{H}_{19}\text{N}_2\text{O}_4\text{P}$  370.1077, found 371.1151.

*9-Phenyl-1-(((S)-1-phenylethyl)amino)-2,3,4,9-tetrahydrophosphinino[2,3-b]indole 1-oxide (14b)*

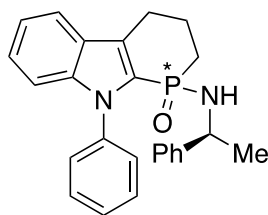

To a round-bottomed flask was added **13a** (1 equiv, 2 mmol) in DCM (5 mL). Oxalyl chloride (2 equiv, 4 mmol) was added dropwise followed by DMF (10 mol %, 0.2 mmol). The reaction mixture was brought to reflux and stirred for 24 h under argon. To a separate flask was added (*S*)-1-phenylethylamine (2 equiv, 4 mmol),  $\text{Et}_3\text{N}$  (2 equiv, 4 mmol), and DMAP (0.1 equiv, 0.2 mmol) in DCM (5 mL). To this the  $\text{P}(\text{O})\text{Cl}$  mixture was added via cannula at rt and stirred for 24 h. The reaction mixture was transferred to a separatory funnel and washed with  $\text{NaHCO}_3$  (sat. aq),  $\text{NH}_4\text{Cl}$  (sat. aq), and then brine. The organic layer was separated, dried with  $\text{MgSO}_4$ , filtered, and concentrated under vacuum. The mixture was concentrated under vacuum and directly purified and resolved by column chromatography on silica gel (hexanes/ethyl acetate 30:70) to afford the phosphoramidate **14a** as a beige solid (0.7 g, 85%, resolved yield 47%). *Mixture*:  $^{31}\text{P}$  NMR (162 MHz,  $\text{CDCl}_3$ )  $\delta$  23.5 (s), 20.4 (s); *Resolved*:  $^{31}\text{P}$  NMR

(162 MHz, CDCl<sub>3</sub>)  $\delta$  23.6 (s); <sup>1</sup>H NMR (400 MHz, CDCl<sub>3</sub>)  $\delta$  7.70 – 7.56 (m, 2H), 7.55 – 7.39 (m, 3H), 7.36 – 7.28 (m, 3H), 7.26 – 7.18 (m, 4H), 7.16 (d, *J* = 1.9 Hz, 2H), 4.28 (dtt, *J* = 13.6, 9.1, 4.6 Hz, 1H), 3.02 – 2.80 (m, 2H), 2.65 (dd, *J* = 10.6, 8.9 Hz, 1H), 2.26 (ddddd, *J* = 17.0, 8.0, 6.0, 4.1, 2.1 Hz, 1H), 2.11 (dddd, *J* = 20.6, 9.4, 4.4, 2.0 Hz, 1H), 2.04 – 1.83 (m, 1H), 1.82 – 1.66 (m, 1H), 1.02 (d, *J* = 6.8 Hz, 3H); <sup>13</sup>C NMR (101 MHz, CDCl<sub>3</sub>)  $\delta$  145.9 (d, *J* = 2.9 Hz), 139.3 (d, *J* = 8.2 Hz), 138.5, 129.2, 128.8, 128.5, 127.9, 127.7 (d, *J* = 3.8 Hz), 126.9, 126.7 (d, *J* = 11.4 Hz), 126.2, 125.8, 125.3, 120.5, 120.0 (d, *J* = 1.5 Hz), 111.1 (d, *J* = 1.5 Hz), 49.9, 30.6 (d, *J* = 93.6 Hz), 25.5 (d, *J* = 6.0 Hz), 23.3 (d, *J* = 3.4 Hz), 21.5 (d, *J* = 5.8 Hz).

*9-(4-Nitrophenyl)-1-(((S)-1-phenylethyl)amino)-2,3,4,9-tetrahydrophosphinino[2,3-*b*]indole 1-oxide (14b)*

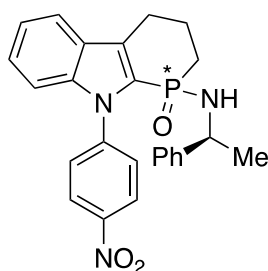

To a round-bottomed flask was added **13b** (1 equiv, 0.4 mmol) in DCM (2 mL). Oxalyl chloride (2 equiv, 0.81 mmol) was added dropwise followed by DMF (10 mol %, 0.04 mmol). The reaction mixture was brought to reflux and stirred for 24 h under argon. To a separate flask was added (*S*)-1-phenylethylamine (2 equiv, 0.81 mmol), Et<sub>3</sub>N (2 equiv, 0.81 mmol), and DMAP (0.1 equiv, 0.04 mmol) in DCM (1 mL). To this the P(O)Cl mixture was added via cannula at rt, and stirred for 24 h. The reaction mixture was transferred to a separatory funnel and washed with NaHCO<sub>3</sub> (sat. aq), NH<sub>4</sub>Cl (sat. aq), and then brine. The organic layer was separated, dried with MgSO<sub>4</sub>, filtered, and concentrated under vacuum. The mixture was concentrated under vacuum and directly purified and resolved by column chromatography on silica gel

(hexanes/ethyl acetate 30:70) to afford the product **14b** (0.12 g, 67%, resolved 20%).  
*Mixture*:  $^{31}\text{P}$  NMR (162 MHz,  $\text{CDCl}_3$ )  $\delta$  22.3 (s), 21.3 (s); *Resolved*:  $^{31}\text{P}$  NMR (162 MHz,  $\text{CDCl}_3$ )  $\delta$  20.4 (s);  $^1\text{H}$  NMR (400 MHz,  $\text{CDCl}_3$ )  $\delta$  8.34 (d,  $J = 8.6$  Hz, 2H), 7.68 (d,  $J = 8.4$  Hz, 1H), 7.42 – 7.38 (m, 2H), 7.24 (td,  $J = 13.6, 8.1$  Hz, 5H), 7.06 – 7.01 (m, 2H), 6.96 (d,  $J = 7.1$  Hz, 1H), 3.88 (q,  $J = 8.0$  Hz, 1H), 3.08 (dd,  $J = 16.9, 4.4$  Hz, 2H), 2.40 (s, 3H), 2.22 – 2.17 (m, 1H), 2.07 – 1.92 (m, 1H), 1.03 (d,  $J = 6.7$  Hz, 3H);  $^{13}\text{C}$  NMR (101 MHz,  $\text{CDCl}_3$ )  $\delta$  146.0, 144.8, 144.1, 138.6 (d,  $J = 7.5$  Hz), 131.0, 130.5, 128.6 (d,  $J = 4.0$  Hz), 127.2 (d,  $J = 8.3$  Hz), 126.3, 125.5, 124.8, 121.6, 120.5, 110.8 (d,  $J = 8.8$  Hz), 50.5 (d,  $J = 15.4$  Hz), 30.6 (d,  $J = 9.1$  Hz), 29.7 (d,  $J = 8.9$  Hz), 26.1 (dd,  $J = 13.0, 5.9$  Hz), 23.3 (dd,  $J = 7.3, 3.7$  Hz), 21.2 (d,  $J = 5.8$  Hz), 20.8 (d,  $J = 5.8$  Hz); HRMS (EI+)  $m/z$   $[\text{M} + \text{H}]^+$  calcd for  $\text{C}_{25}\text{H}_{24}\text{N}_3\text{O}_3\text{P}$  445.1550, found 446.1633.

*1-Hydroxy-9-(4-nitrophenyl)-2,3,4,9-tetrahydrophosphinino[2,3-b]indole 1-sulfide (2)*

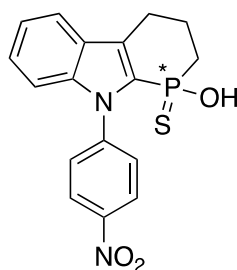

To a round-bottomed flask was added the ( $R_p$ ) or ( $S_p$ )-**14b** (1 equiv, 0.9 mmol) in THF (3 mL) under argon. The reaction mixture was cooled to 0 °C in an ice bath. NaH (3 equiv, 2.7 mmol, 60% in mineral oil) was added in one portion and the mixture brought to rt and stirred for 1 h, then  $\text{CS}_2$  (10 equiv, 9 mmol) was added dropwise and the reaction stirred at rt overnight. The reaction mixture was cooled to rt and diluted with ethyl acetate (30 mL) and transferred to a separatory funnel. The organic layer was extracted with  $\text{NaHCO}_3$  (sat. aq, 3  $\times$ ), and the layers separated. The basic layer was acidified with 3 M HCl (pH 1) and extracted with ethyl acetate. The organic layer

was separated and dried with MgSO<sub>4</sub>, filtered and concentrated under vacuum to afford the product **2** as a yellow solid (0.3 g, 80%). <sup>31</sup>P NMR (162 MHz, DMSO-*d*<sub>6</sub>) δ 58.1 (s); <sup>1</sup>H NMR (400 MHz, DMSO-*d*<sub>6</sub>) δ 11.94 (s, 1H), 8.45 – 8.36 (m, 2H), 7.91 – 7.83 (m, 2H), 7.71 (dt, *J* = 7.9, 1.0 Hz, 1H), 7.42 – 7.27 (m, 2H), 7.24 (ddd, *J* = 7.9, 6.6, 1.3 Hz, 1H), 3.11 – 2.99 (m, 1H), 2.99 – 2.86 (m, 1H), 2.39 (ddt, *J* = 17.3, 9.8, 3.4 Hz, 1H), 2.33 – 2.08 (m, 3H); <sup>13</sup>C NMR (101 MHz, DMSO-*d*<sub>6</sub>) δ 146.4, 144.6, 138.6 (d, *J* = 7.9 Hz), 130.4 (d, *J* = 109.2 Hz), 128.9, 126.9 (d, *J* = 11.0 Hz), 126.2, 125.1, 124.9 (d, *J* = 11.8 Hz), 121.7, 121.0, 110.8, 37.3 (d, *J* = 78.5 Hz), 23.1 (d, *J* = 3.3 Hz), 20.9 (d, *J* = 7.0 Hz); HRMS (EI+) *m/z* [M + H]<sup>+</sup> calcd for C<sub>17</sub>H<sub>15</sub>N<sub>2</sub>O<sub>3</sub>P 358.0536, found 359.0618.

*N*-(1,1'-Biphenyl-4-yl)-1,1'-biphenyl-2-amine (**16**)

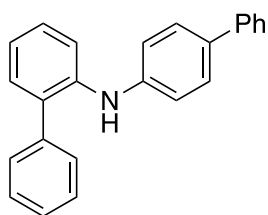

To a round-bottomed flask was added 1-aminobiphenyl (1 equiv, 36 mmol) and 4-bromobiphenyl (1 equiv, 36 mmol) in toluene (67 mL). The reaction mixture was flushed with argon for 10 min, then Pd(OAc)<sub>2</sub> (1 mol %, 0.37 mmol), dppf (2 mol %, 0.66 mmol) and NaO*t*-Bu (1.1 equiv, 47 mmol) were added and the reaction mixture brought to reflux for 16 h. The mixture was then cooled to rt, and H<sub>2</sub>O (30 mL) was added then the mixture was transferred to a separatory funnel. The organic layer was washed with H<sub>2</sub>O, extracted with toluene, and the layers were separated. The organic layer was dried with MgSO<sub>4</sub>, filtered, and concentrated in vacuum. The crude product was purified by column chromatography to yield the product **16** (2.5 g, 85%).<sup>2</sup> <sup>1</sup>H NMR (400 MHz, CDCl<sub>3</sub>) δ 7.65 – 7.58 (m, 2H), 7.56 – 7.53 (m, 2H), 7.53 – 7.48 (m, 5H),

7.47 – 7.39 (m, 3H), 7.34 (td,  $J = 6.8, 1.6$  Hz, 3H), 7.19 – 7.13 (m, 2H), 7.09 (dd,  $J = 7.4, 1.2$  Hz, 1H), 5.72 (s, 1H).

*5-([1,1'-Biphenyl]-4-yl)-6-((1-phenylethyl)amino)-5H-dibenzo[*c,e*][1,2]azaphosphinine 6-oxide (17)*

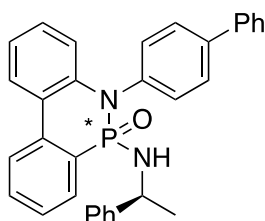

In a manner similar to [38] under neat conditions to a round-bottomed flask was added **16** (1 equiv, 7.8 mmol) and phosphorus trichloride (2.3 equiv, 18.13 mmol), and the mixture brought to 50 °C in an oil bath and stirred for 3 h under argon. The reaction mixture was cooled to rt, and zinc chloride (0.43 equiv, 0.36 mmol) was added. The reaction mixture was brought to 150 °C and stirred for 8 h under argon. After cooling to 0 °C, the crude was solubilized in toluene (30 mL), and DIPEA (2.0 equiv, 15.6 mmol) and (*S*)-1-phenylethylamine (2.0 equiv, 15.6 mmol) were added and stirred at rt for 2 h under argon. To the reaction mixture H<sub>2</sub>O<sub>2</sub> (35 wt % in H<sub>2</sub>O, 5.0 equiv, 39 mmol) and THF (10 mL) were added at 0 °C and then stirred for 4 h at rt. The organic layer was poured into 1 M HCl and diluted with EtOAc, then transferred to a separatory funnel. The organic layer was washed with NaHCO<sub>3</sub> (sat. aq.) and brine. The layers were separated, and the organic layer dried over MgSO<sub>4</sub>, filtered, and concentrated under a vacuum. The crude product was purified by column chromatography (hexanes/EtOAc 50:50) to afford the phosphonamide as a white solid **17** (1.9 g, 49%). The solid was dissolved in hot EtOAc, hexane was added, and the flask was placed in the refrigerator (−18 °C) overnight. The resulting solid precipitant were filtered and washed with hexanes to afford the resolved product (0.375 g, 20%). <sup>31</sup>P NMR (162 MHz, CDCl<sub>3</sub>) δ 9.23 (s); <sup>1</sup>H NMR (400 MHz, CDCl<sub>3</sub>) δ 8.19 – 8.01 (m,

2H), 7.91 (ddd,  $J = 14.3, 7.7, 1.5$  Hz, 1H), 7.70 (ddt,  $J = 8.3, 7.2, 1.2$  Hz, 1H), 7.64 – 7.58 (m, 2H), 7.55 (d,  $J = 8.5$  Hz, 2H), 7.49 (dd,  $J = 8.3, 6.8$  Hz, 3H), 7.41 (d,  $J = 7.4$  Hz, 1H), 7.37 – 7.32 (m, 2H), 7.26 – 7.09 (m, 5H), 7.06 – 6.97 (m, 2H), 6.71 (dt,  $J = 8.2, 1.2$  Hz, 1H), 4.41 – 4.20 (m, 1H), 3.08 (t,  $J = 9.8$  Hz, 1H), 1.15 (d,  $J = 6.8$  Hz, 3H).

5-([1,1'-Biphenyl]-4-yl)-6-hydroxy-5H-dibenzo[*c,e*][1,2]azaphosphinine 6-sulfide (**4**)

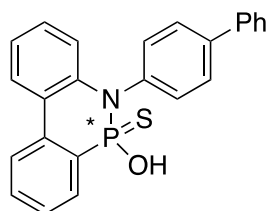

To a solution of ( $S_p$ ) or ( $R_p$ )-**17** in dry THF (8 mL) was added at 0 °C NaH (3.0 equiv, 1.5 mmol, 60% dispersion in mineral oil) under argon. The reaction mixture was stirred for 1 h at rt, and then carbon disulfide (10.0 equiv, 7.7 mmol) was added dropwise and stirred for 4 h at rt. Ethyl acetate and hexanes were added and washed (3 ×) with a saturated aqueous solution of NaHCO<sub>3</sub>. The two layers were separated, and the aqueous layer was acidified with 3 M HCl until pH 1 and extracted with ethyl acetate. The organic layer was dried over MgSO<sub>4</sub>, filtered, and concentrated under vacuum. The crude mixture was solubilized in DCM and the precipitate filtered out. The filtrate was concentrated under a vacuum to afford the product **4** as an orange oil (0.58 g, 75%). <sup>31</sup>P NMR (162 MHz, CDCl<sub>3</sub>) δ 61.8; <sup>1</sup>H NMR (400 MHz, CDCl<sub>3</sub>) δ 9.34 (s, 1H), 8.30 (ddd,  $J = 17.0, 7.7, 1.4$  Hz, 1H), 8.13 – 8.05 (m, 2H), 7.73 (dd,  $J = 8.1, 6.6$  Hz, 3H), 7.70 – 7.63 (m, 2H), 7.58 (td,  $J = 7.6, 3.4$  Hz, 1H), 7.52 – 7.44 (m, 4H), 7.45 – 7.37 (m, 1H), 7.28 – 7.25 (m, 1H), 7.20 (t,  $J = 7.5$  Hz, 1H), 6.78 (d,  $J = 8.2$  Hz, 1H).



References:

[1] Bryant, D.; Kilner, C.; Kee, T. *Inorg. Chim. Acta.* **2009**, 362, 614.

[2] Riedmüller, S.; Kaufhold, O.; Spreitzer, H.; Nachtsheim, B. *J. Eur. J. Org. Chem.* **2014**, 1391–1394.

[3] Ferry, F.; Stemper, J.; Marinetti, A.; Voituriez, A.; Guinchard, X. *Eur. J. Org. Chem.*, **2014**, 188–193. DOI: 10.1002/ejoc.201301253.

## HPLC chromatograms.

*Representative procedure for the asymmetric hydrogenation of 2-phenylquinoline (20)*

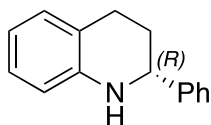

To a reaction tube was added 2-phenylquinoline (1 equiv, 0.25 mmol), the Hantzsch ester **19** (2.4 equiv, 0.58 mmol) in toluene (5 mL) under argon. The reaction mixture was cooled to 0 °C, then the CPA catalyst **2–4** (0.005 mmol, 2 mol %) was added. The reaction mixture was brought to rt and stirred for 24 h. The reaction mixture was concentrated under vacuum, and the crude product was purified directly by column chromatography (hexanes/ethyl acetate 95:5) to yield known compound **20**, as a colorless oil in quantitative yield.<sup>3</sup> Enantiomeric excess was determined by HPLC with a Chiralcel OD-H column (hexane/iPrOH 95:5, 1.0 mL/min).

Racemic 2-phenyl-1,2,3,4-tetra-hydroquinoline (**20**) HPLC.

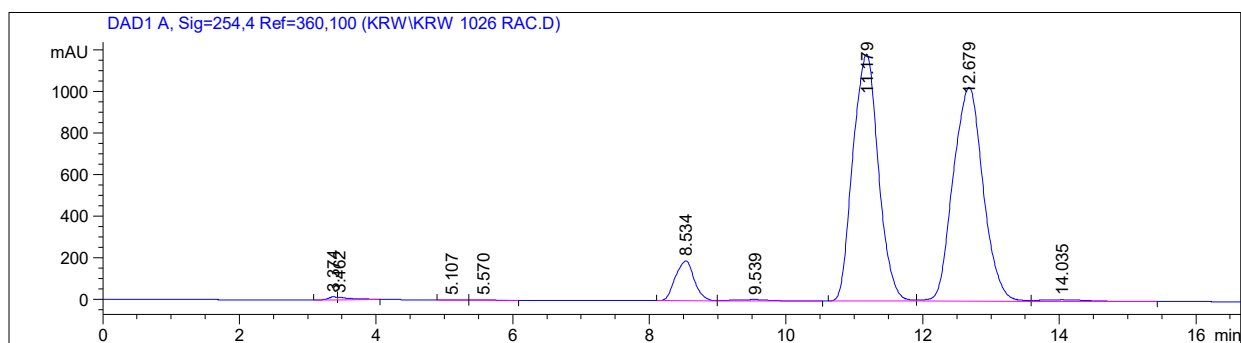

Signal 1: DAD1 A, Sig=254,4 Ref=360,100

| Peak # | RetTime [min] | Type | Width [min] | Area [mAU*s] | Height [mAU] | Area %  |
|--------|---------------|------|-------------|--------------|--------------|---------|
| 1      | 3.374         | BV   | 0.1217      | 107.46756    | 13.67281     | 0.1607  |
| 2      | 3.462         | VB   | 0.1805      | 162.36674    | 11.80467     | 0.2428  |
| 3      | 5.107         | BV   | 0.1814      | 17.68106     | 1.47967      | 0.0264  |
| 4      | 5.570         | VB   | 0.1998      | 16.04880     | 1.21773      | 0.0240  |
| 5      | 8.534         | BV   | 0.3105      | 3673.62305   | 192.60971    | 5.4927  |
| 6      | 9.539         | VB   | 0.4760      | 226.74150    | 6.26831      | 0.3390  |
| 7      | 11.179        | BV   | 0.4184      | 3.08269e4    | 1189.19141   | 46.0919 |
| 8      | 12.679        | VB   | 0.4916      | 3.14381e4    | 1031.29443   | 47.0057 |
| 9      | 14.035        | BB   | 0.5761      | 412.46259    | 8.56110      | 0.6167  |

Totals : 6.68814e4 2456.09984

## 2-Phenyl-1,2,3,4-tetra-hydroquinoline from CPA 2 HPLC

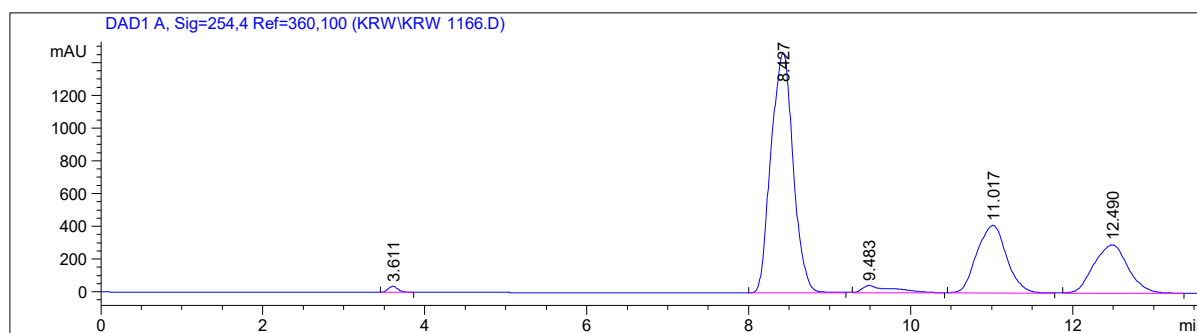

Signal 1: DAD1 A, Sig=254,4 Ref=360,100

| Peak # | RetTime [min] | Type | Width [min] | Area [mAU*s] | Height [mAU] | Area %  |
|--------|---------------|------|-------------|--------------|--------------|---------|
| 1      | 3.611         | BB   | 0.1295      | 311.49915    | 38.06655     | 0.6414  |
| 2      | 8.427         | BB   | 0.3080      | 2.78476e4    | 1463.50867   | 57.3414 |
| 3      | 9.483         | BB   | 0.3455      | 1234.98560   | 45.95943     | 2.5430  |
| 4      | 11.017        | BB   | 0.4118      | 1.05513e4    | 413.30026    | 21.7262 |
| 5      | 12.490        | BB   | 0.4731      | 8619.25293   | 294.80676    | 17.7480 |

Totals : 4.85646e4 2255.64167

## 2-Phenyl-1,2,3,4-tetrahydroquinoline from CPA 3 HPLC.

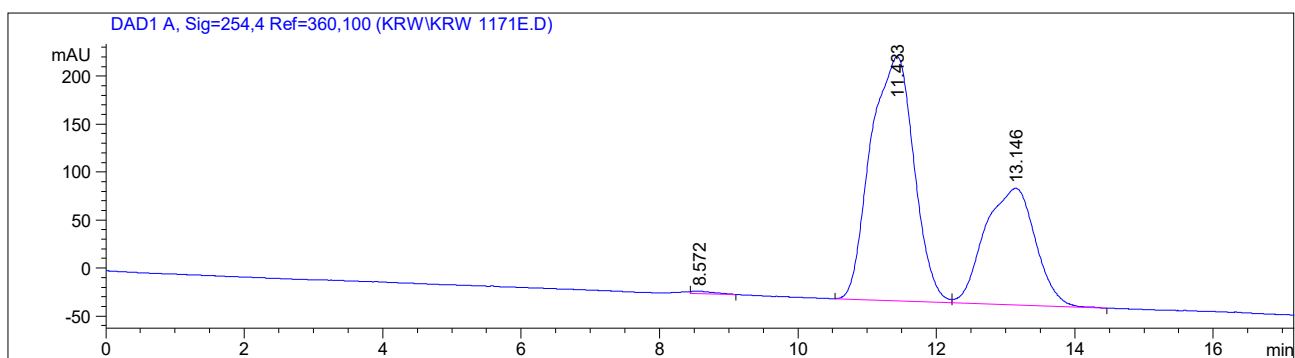

Signal 1: DAD1 A, Sig=254,4 Ref=360,100

| Peak # | RetTime [min] | Type | Width [min] | Area [mAU*s] | Height [mAU] | Area %  |
|--------|---------------|------|-------------|--------------|--------------|---------|
| 1      | 8.572         | BB   | 0.3008      | 65.14135     | 2.63140      | 0.3780  |
| 2      | 11.433        | BV   | 0.5957      | 1.10346e4    | 254.57335    | 64.0239 |
| 3      | 13.146        | VB   | 0.6986      | 6135.39111   | 121.60060    | 35.5982 |

Totals : 1.72351e4 378.80535

## 2-Phenyl-1,2,3,4-tetrahydroquinoline from CPA 4 HPLC:

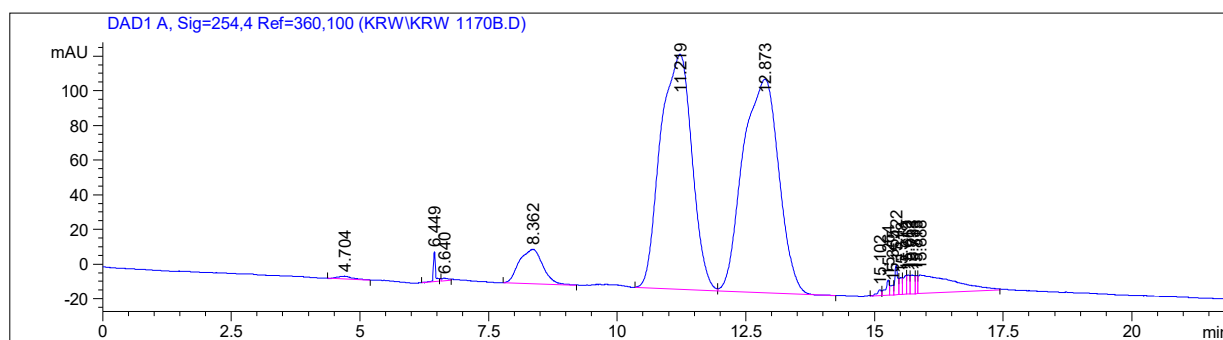

Signal 1: DAD1 A, Sig=254,4 Ref=360,100

| Peak #   | RetTime [min] | Type | Width [min] | Area [mAU*s] | Height [mAU] | Area %  |
|----------|---------------|------|-------------|--------------|--------------|---------|
| 1        | 4.704         | BB   | 0.2404      | 29.89528     | 1.54059      | 0.2247  |
| 2        | 6.449         | BB   | 0.0466      | 50.97886     | 17.19250     | 0.3832  |
| 3        | 6.640         | BB   | 0.1065      | 12.50844     | 1.54424      | 0.0940  |
| 4        | 8.362         | BB   | 0.4317      | 627.11212    | 19.89706     | 4.7134  |
| 5        | 11.219        | BV   | 0.5768      | 5721.33643   | 135.43665    | 43.0020 |
| 6        | 12.873        | VB   | 0.6832      | 5966.75293   | 123.16451    | 44.8466 |
| 7        | 15.102        | VV   | 0.0800      | 19.11582     | 3.37819      | 0.1437  |
| 8        | 15.264        | VV   | 0.0691      | 43.87333     | 8.66000      | 0.3298  |
| 9        | 15.355        | VV   | 0.0607      | 26.47861     | 5.65116      | 0.1990  |
| 10       | 15.422        | VV   | 0.0582      | 67.97022     | 17.16884     | 0.5109  |
| 11       | 15.518        | VV   | 0.0551      | 39.45806     | 9.77429      | 0.2966  |
| 12       | 15.613        | VV   | 0.0622      | 50.56691     | 10.89502     | 0.3801  |
| 13       | 15.662        | VV   | 0.0565      | 41.87500     | 10.97777     | 0.3147  |
| 14       | 15.733        | VV   | 0.0802      | 61.59865     | 10.85541     | 0.4630  |
| 15       | 15.813        | VV   | 0.0508      | 34.66135     | 10.41127     | 0.2605  |
| 16       | 15.888        | VB   | 0.5615      | 510.62433    | 10.80262     | 3.8379  |
| Totals : |               |      |             | 1.33048e4    | 397.35012    |         |

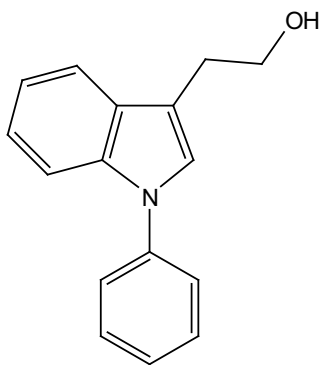

6

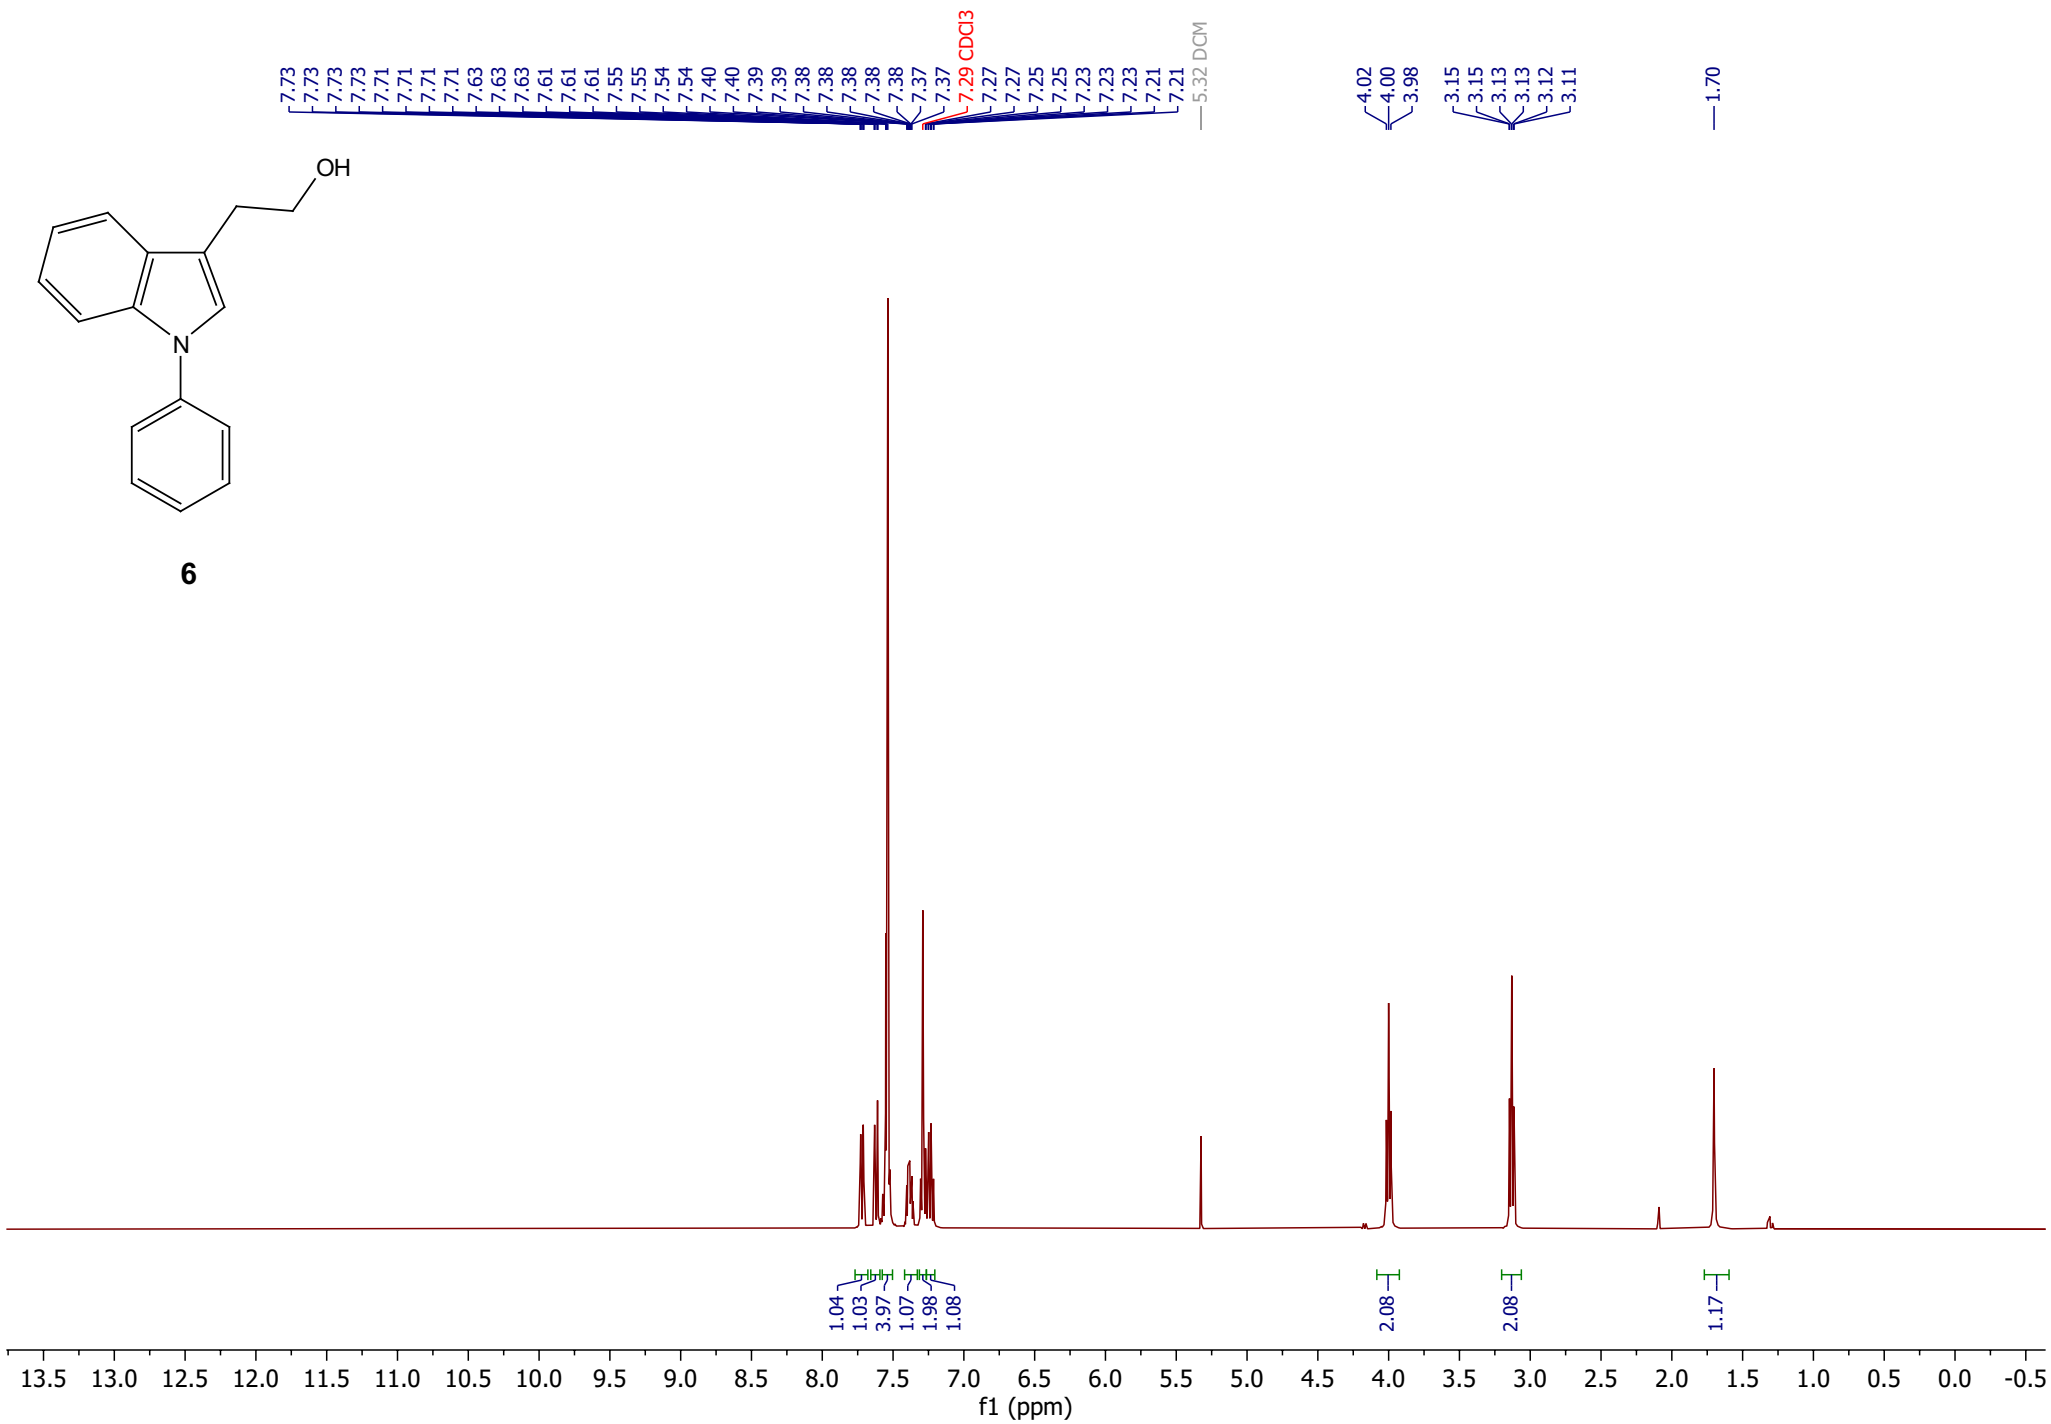

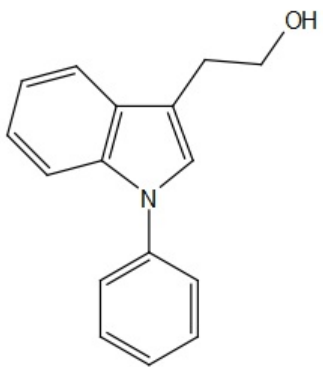

6

139.74  
136.25  
129.65  
128.95  
126.30  
126.28  
124.16  
122.69  
120.13  
119.24  
113.47  
110.69

77.40 CDCl3  
77.09 CDCl3  
76.77 CDCl3

62.65

28.70

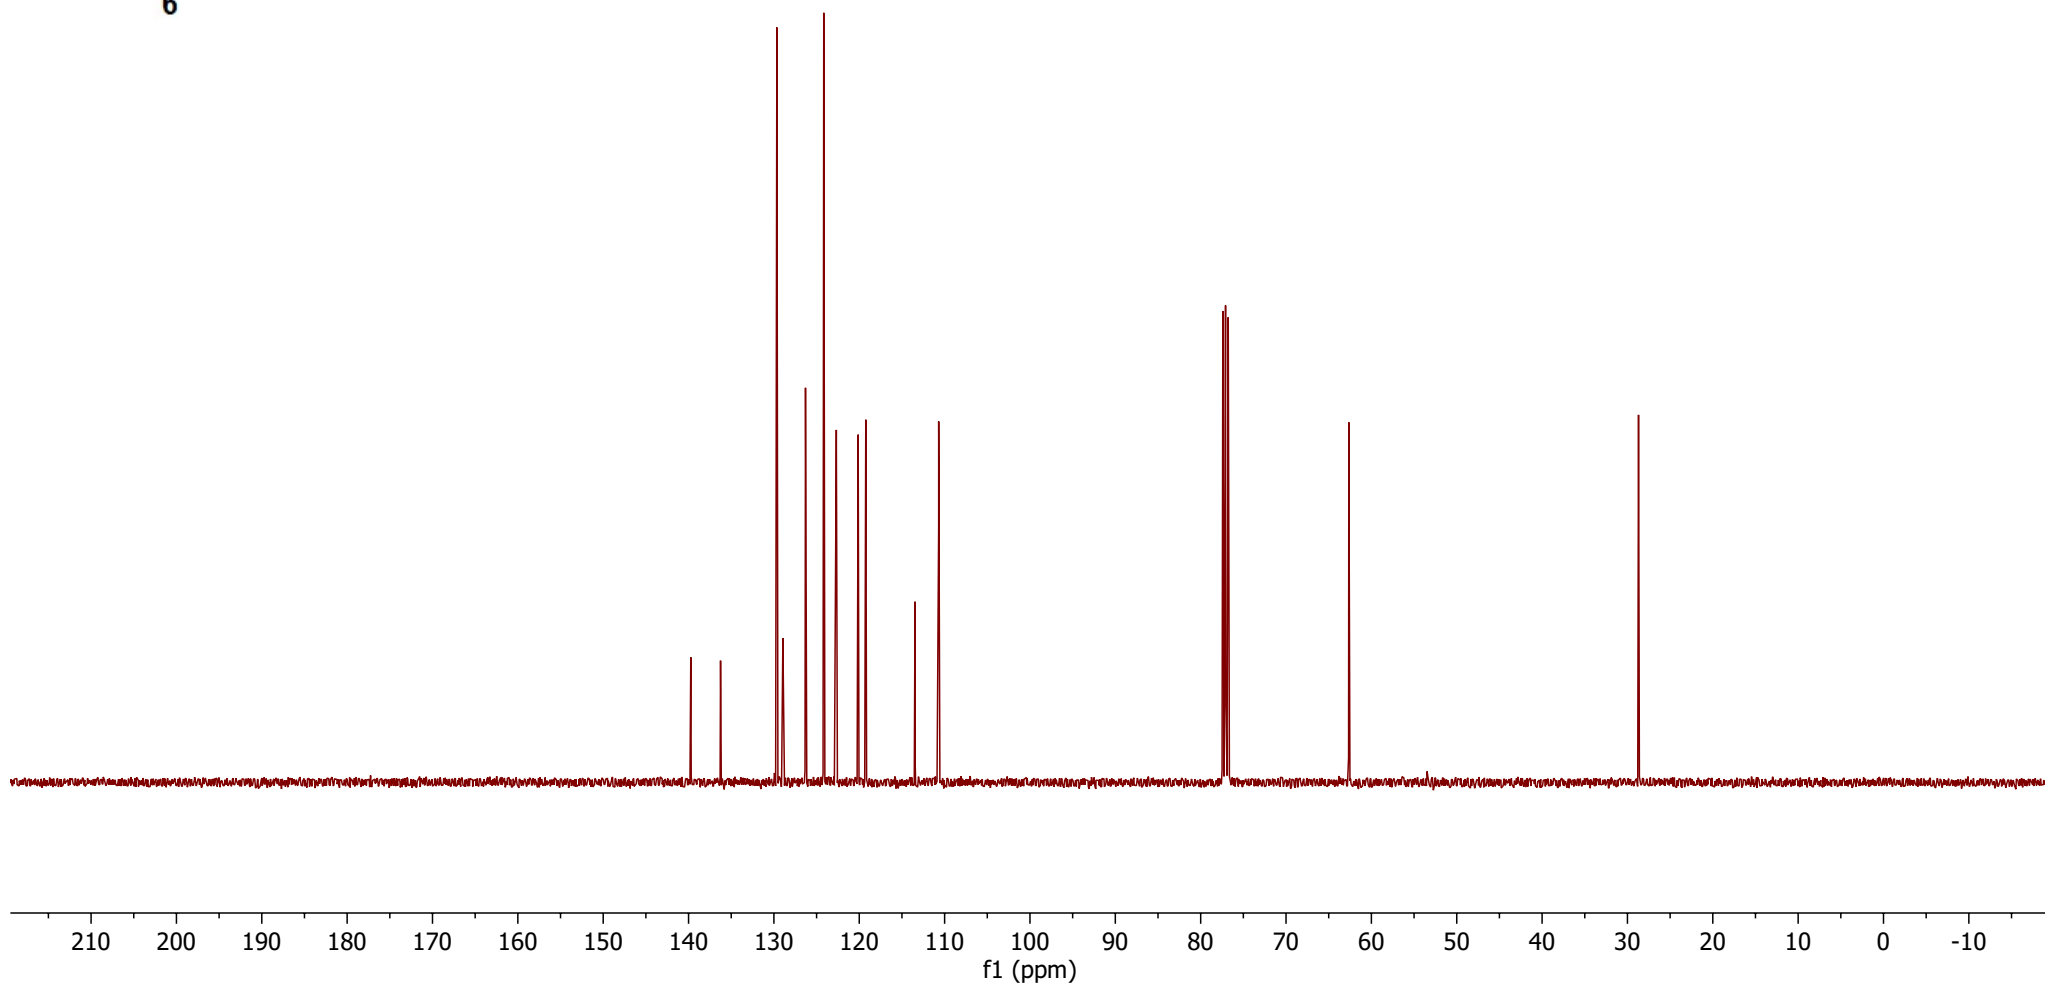



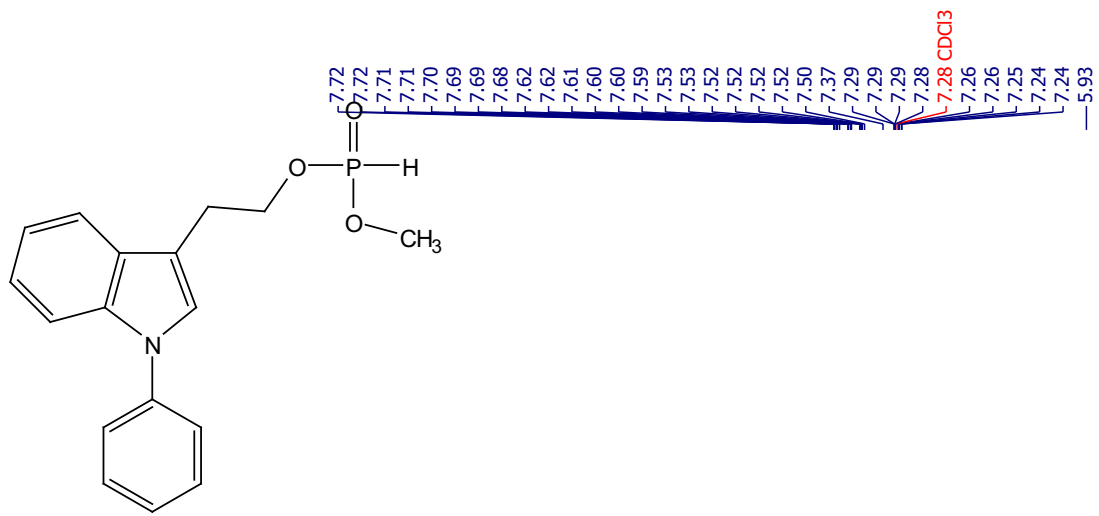

7

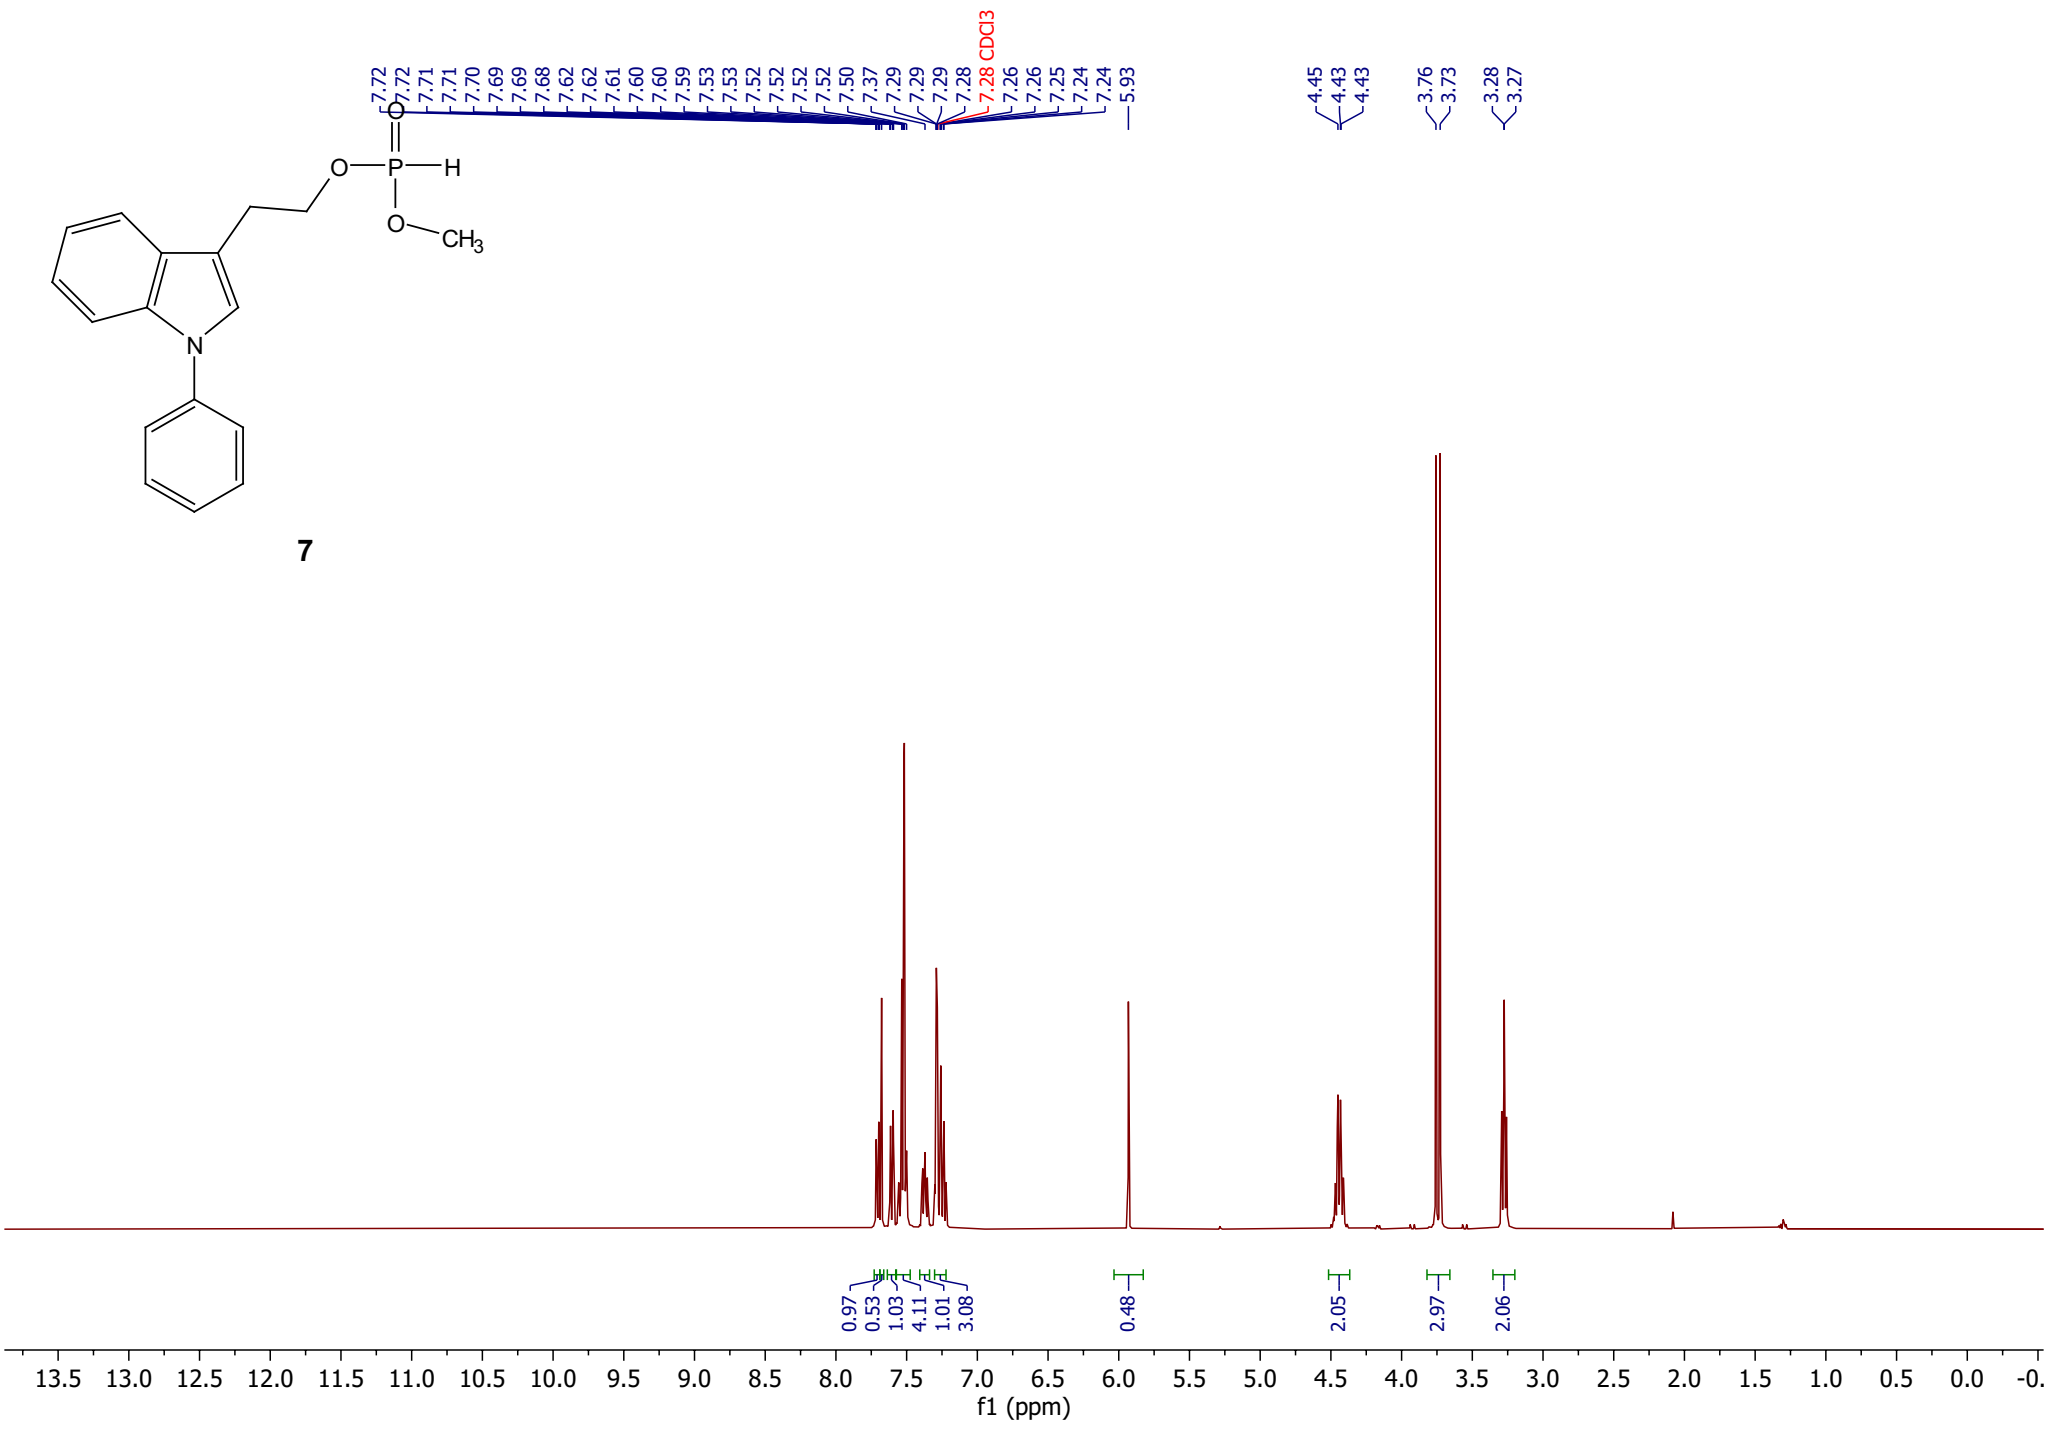





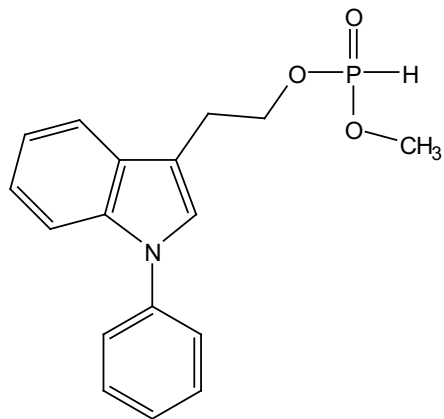

7

139.62  
136.02  
129.70  
128.73  
126.42  
126.29  
124.18  
122.73  
120.26  
119.00  
112.15  
110.72

77.54 CDCl3  
77.22 CDCl3  
76.90 CDCl3

65.68  
65.62

52.00  
51.94

26.68  
26.62

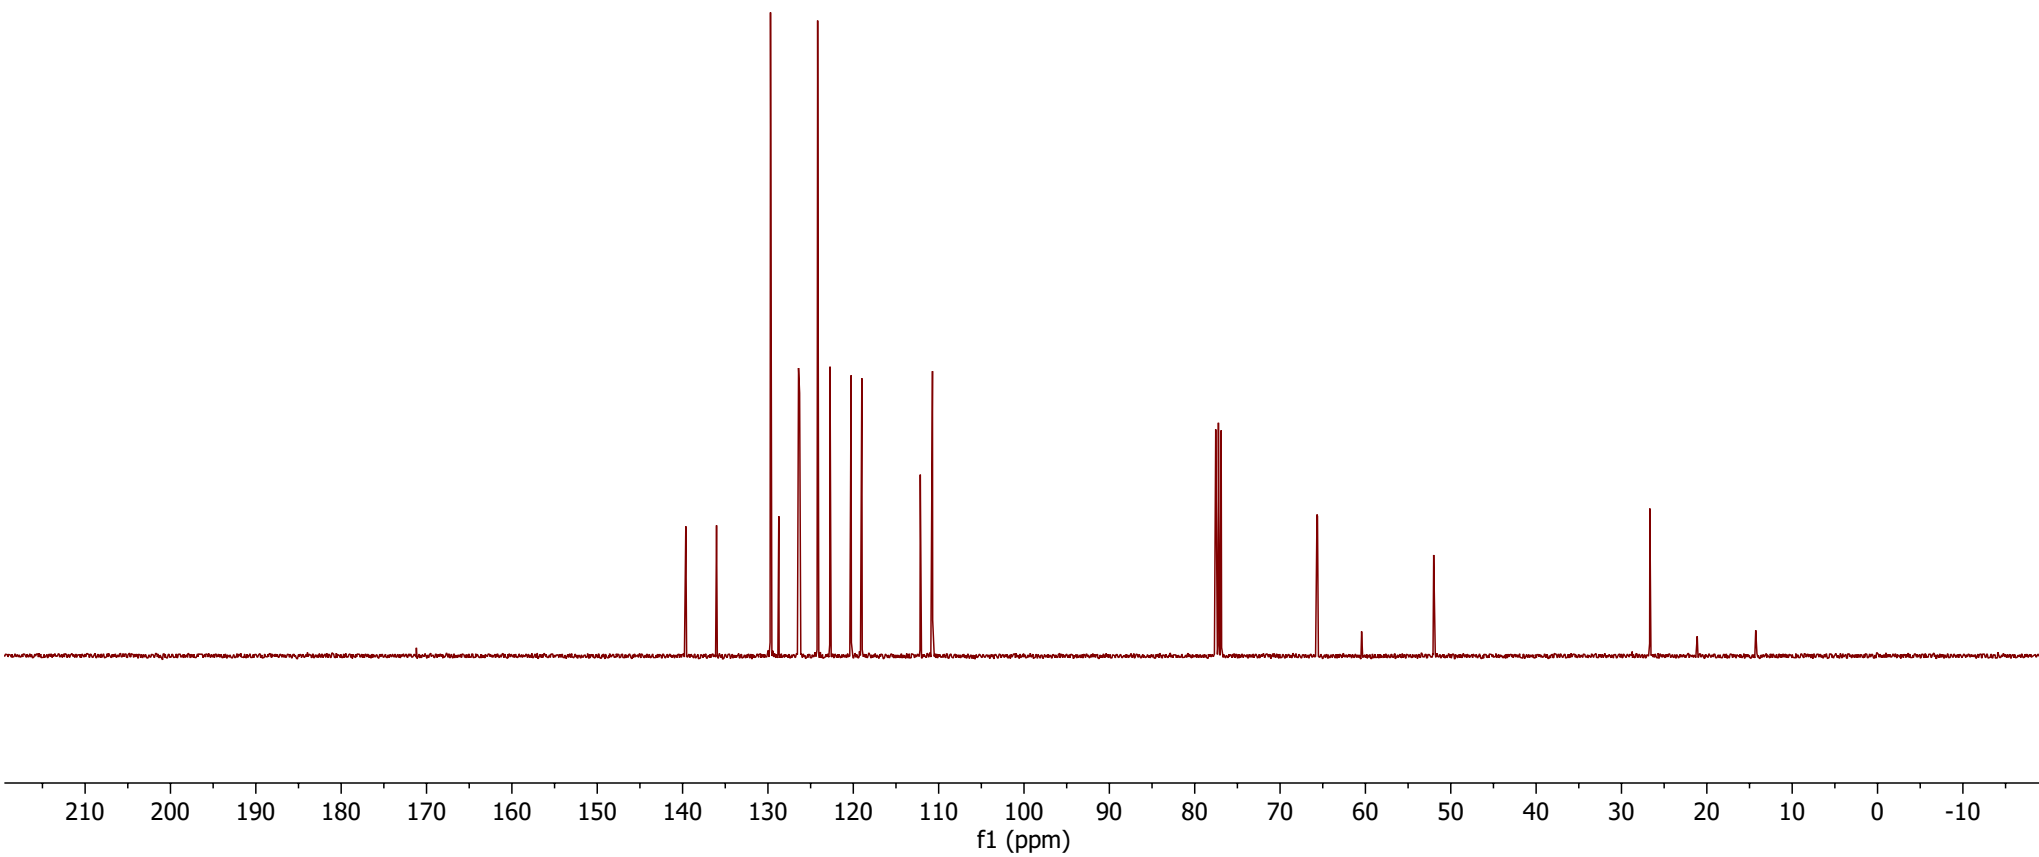

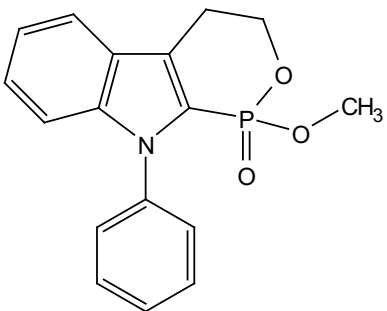

8

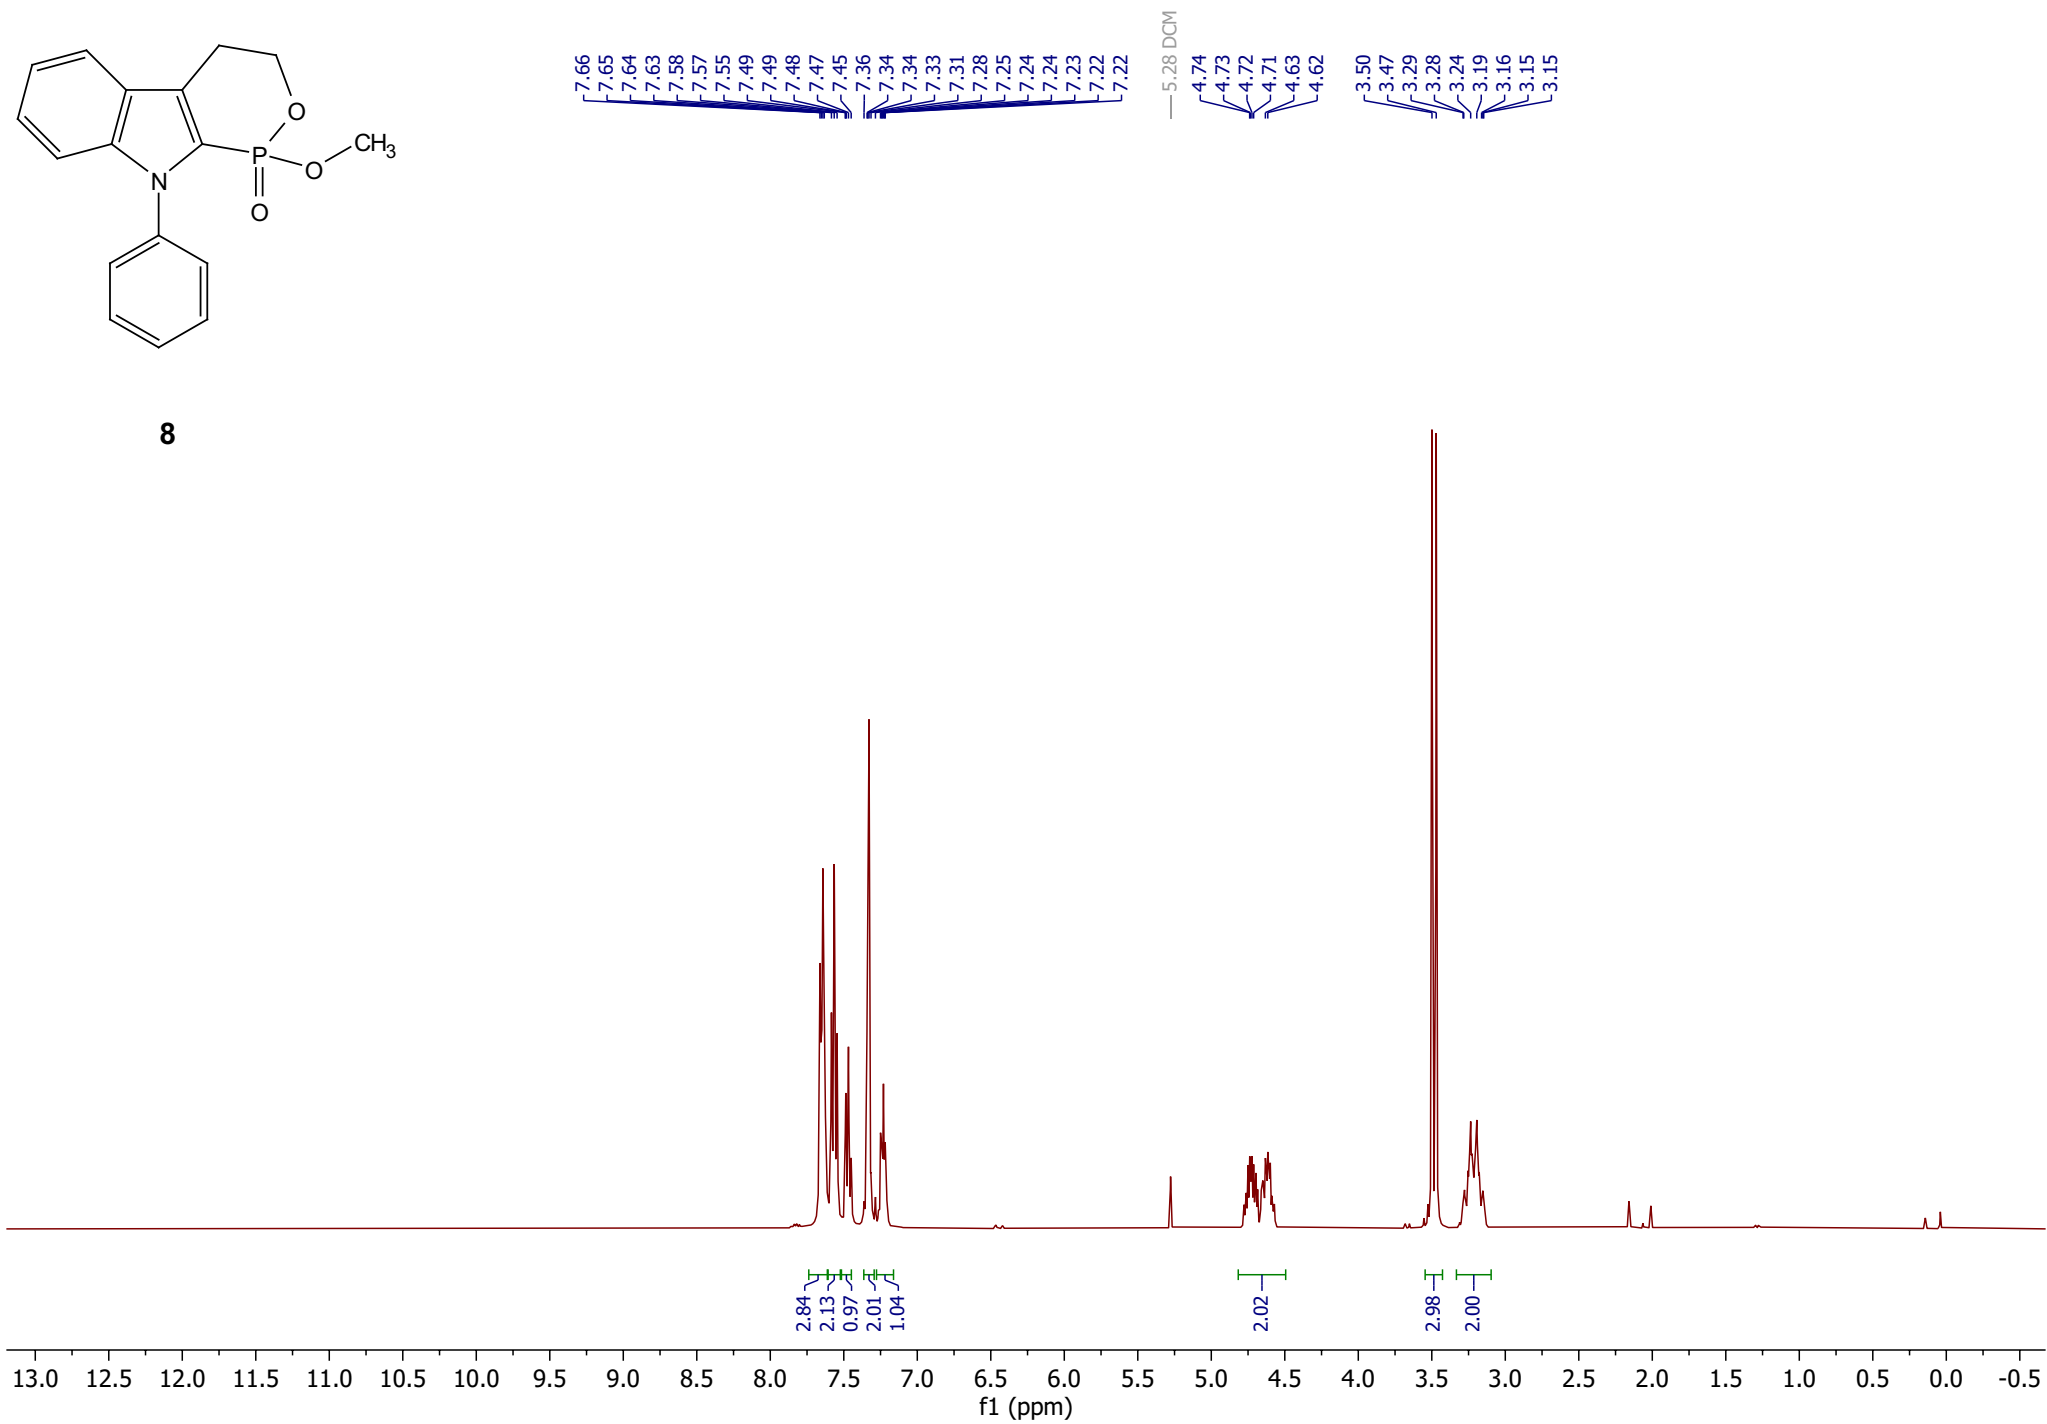

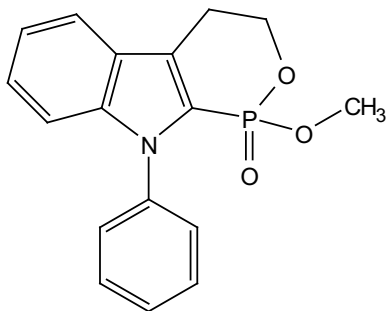

**8**

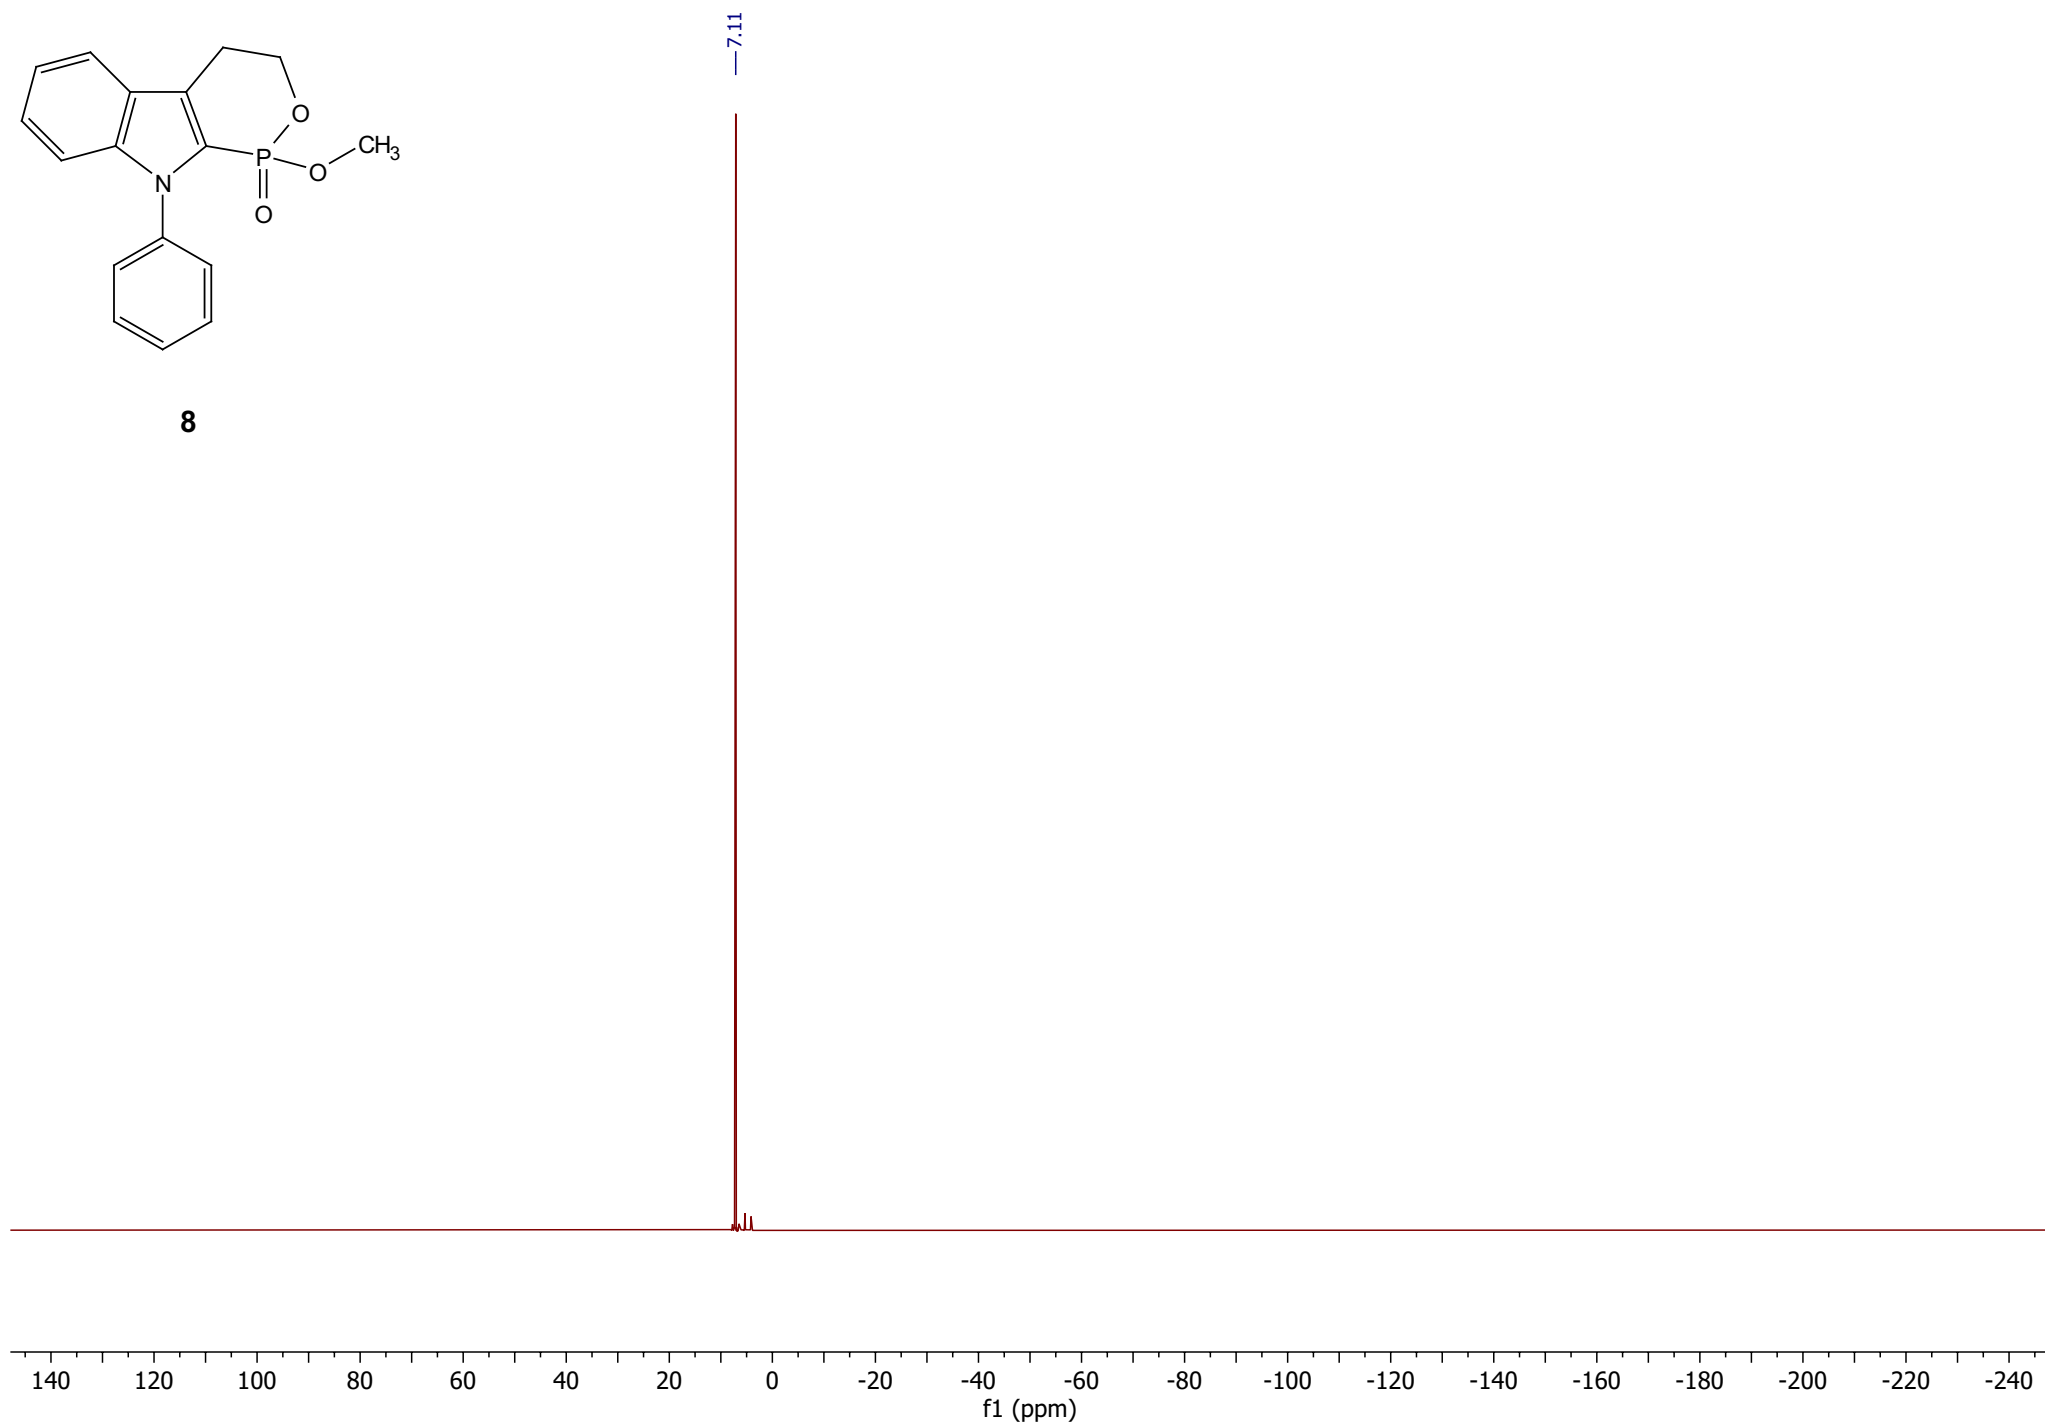

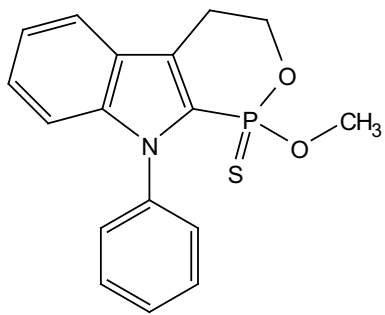

9

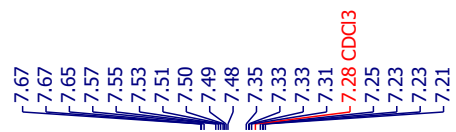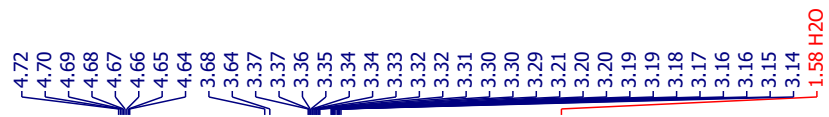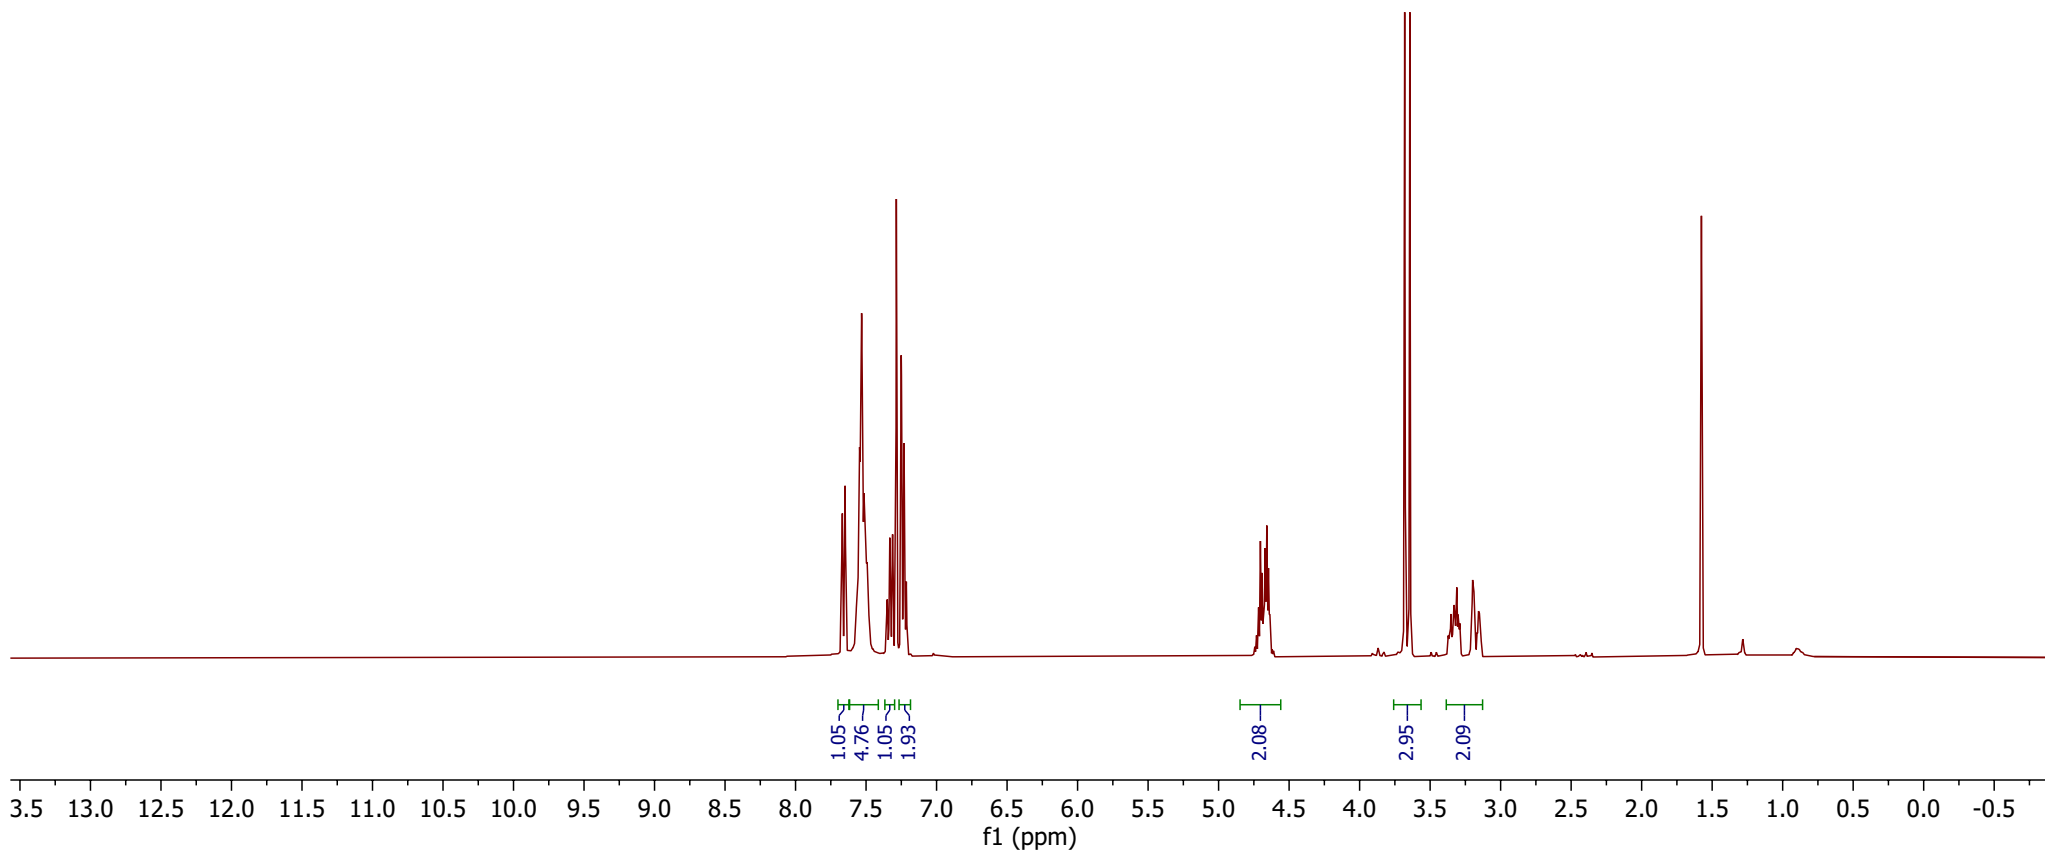

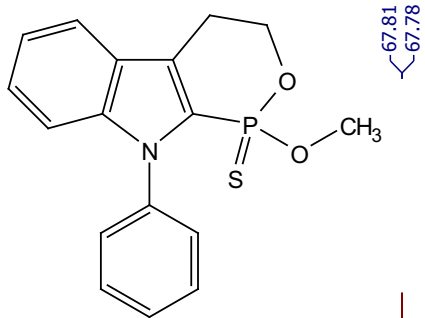

67.81  
67.78

9

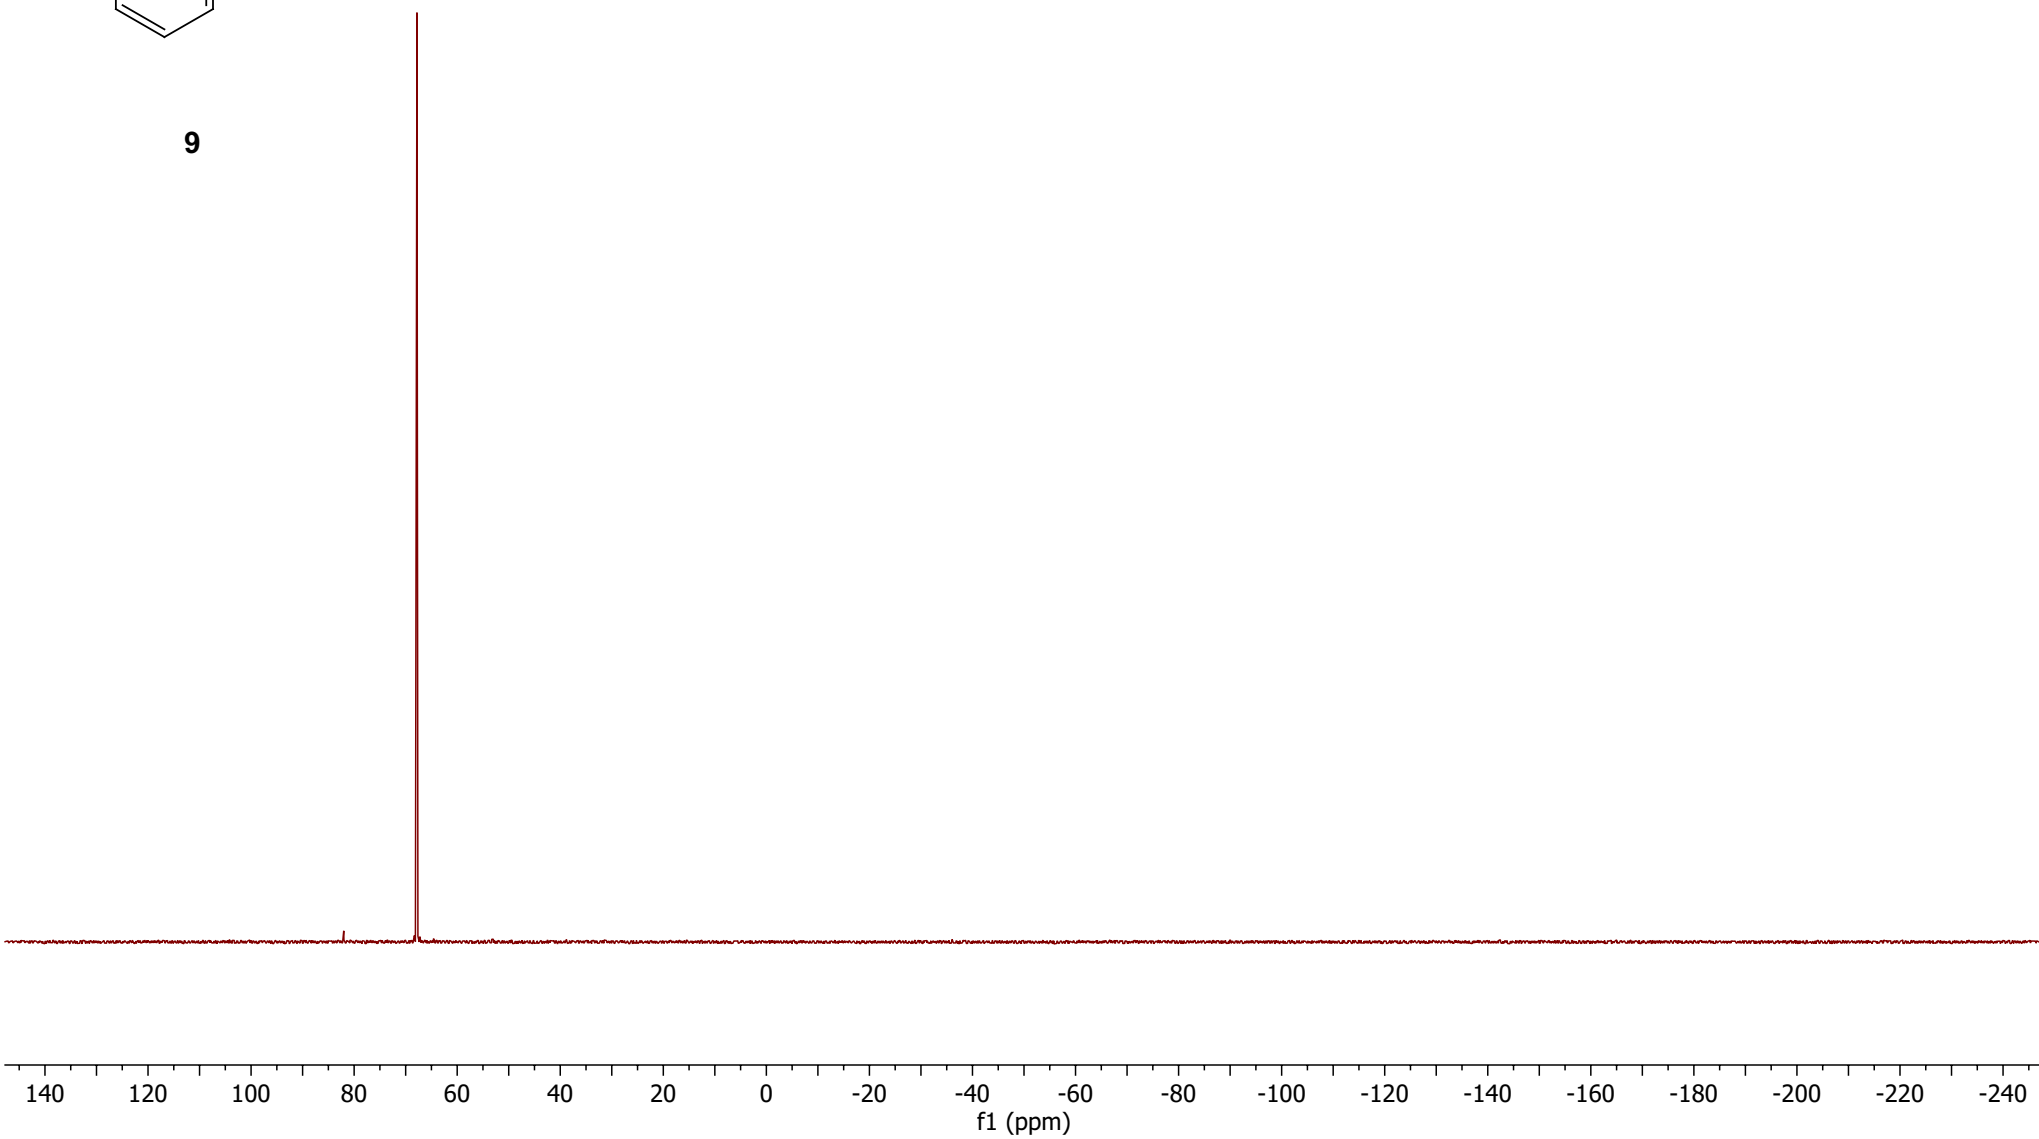



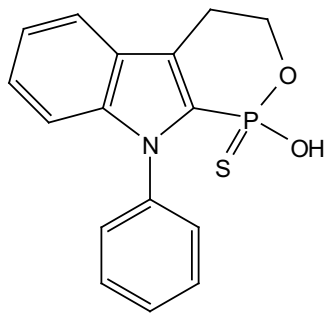

**1**

—49.06

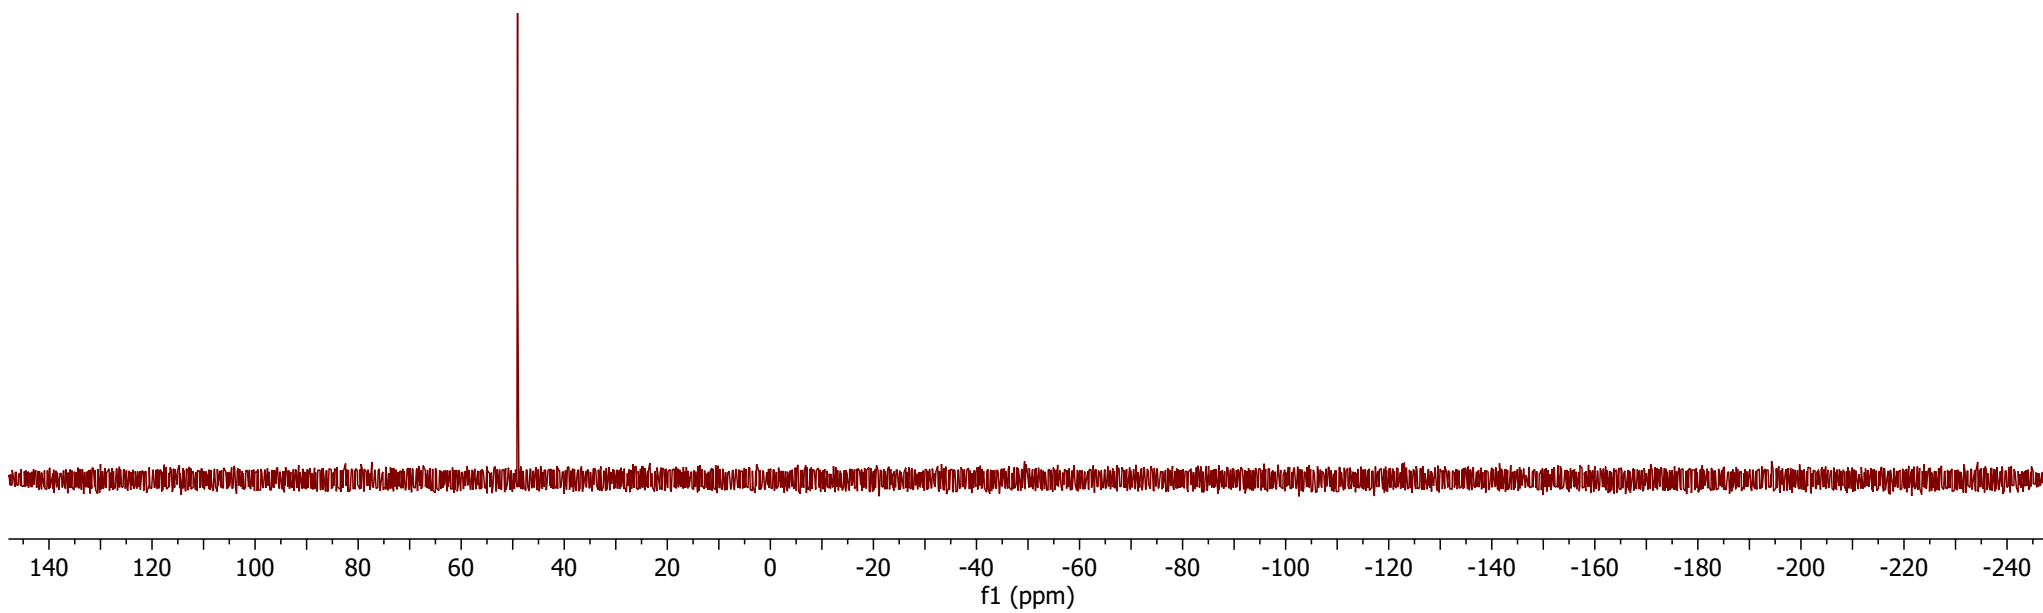

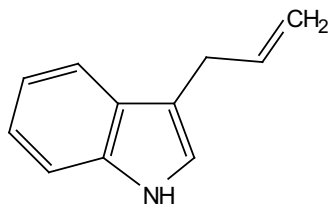

10

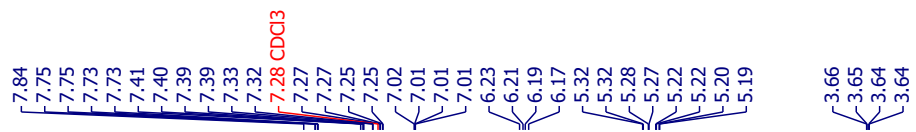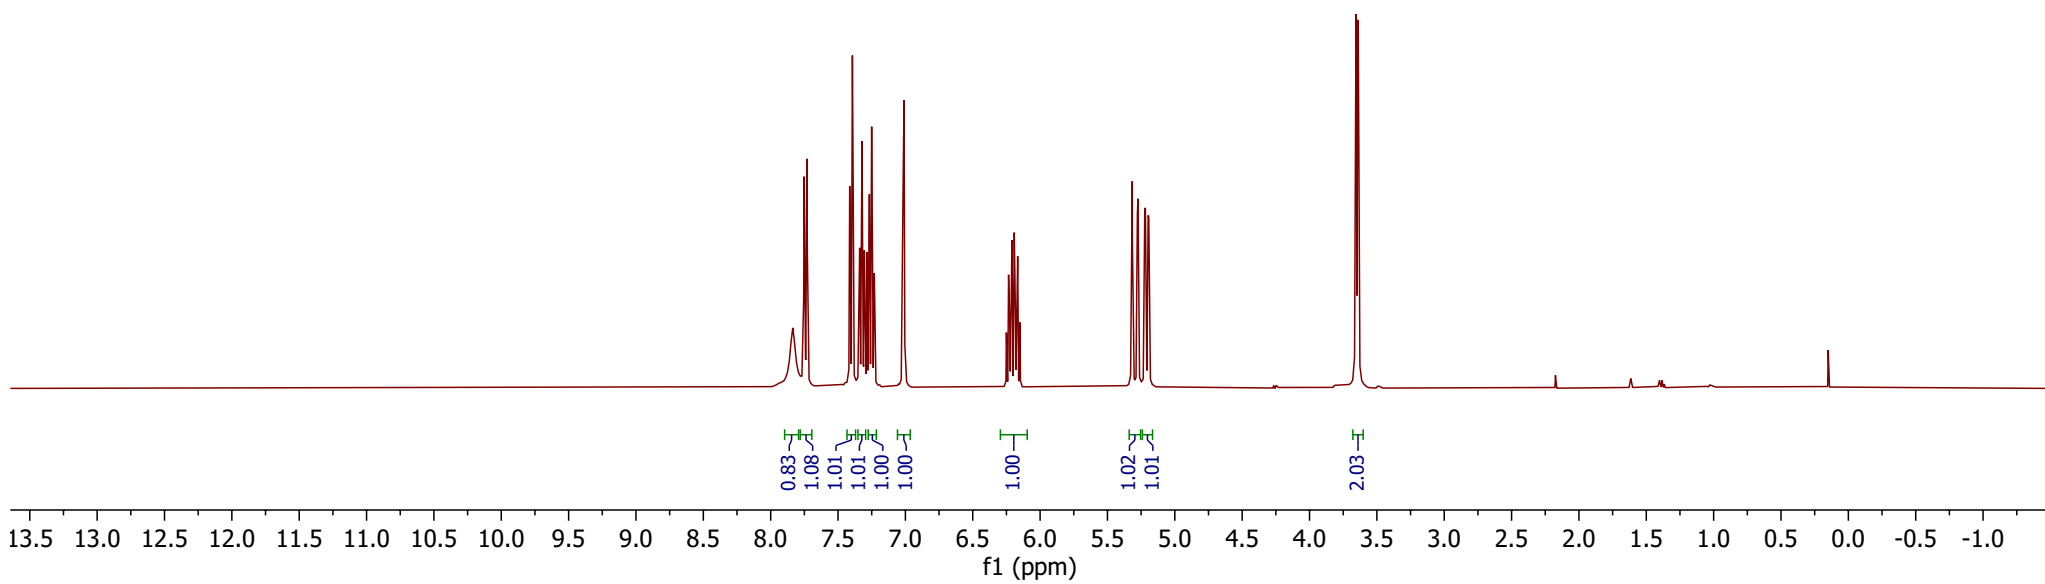

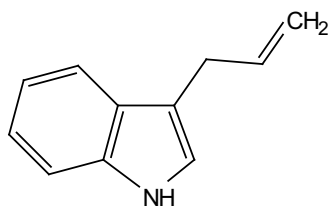

10

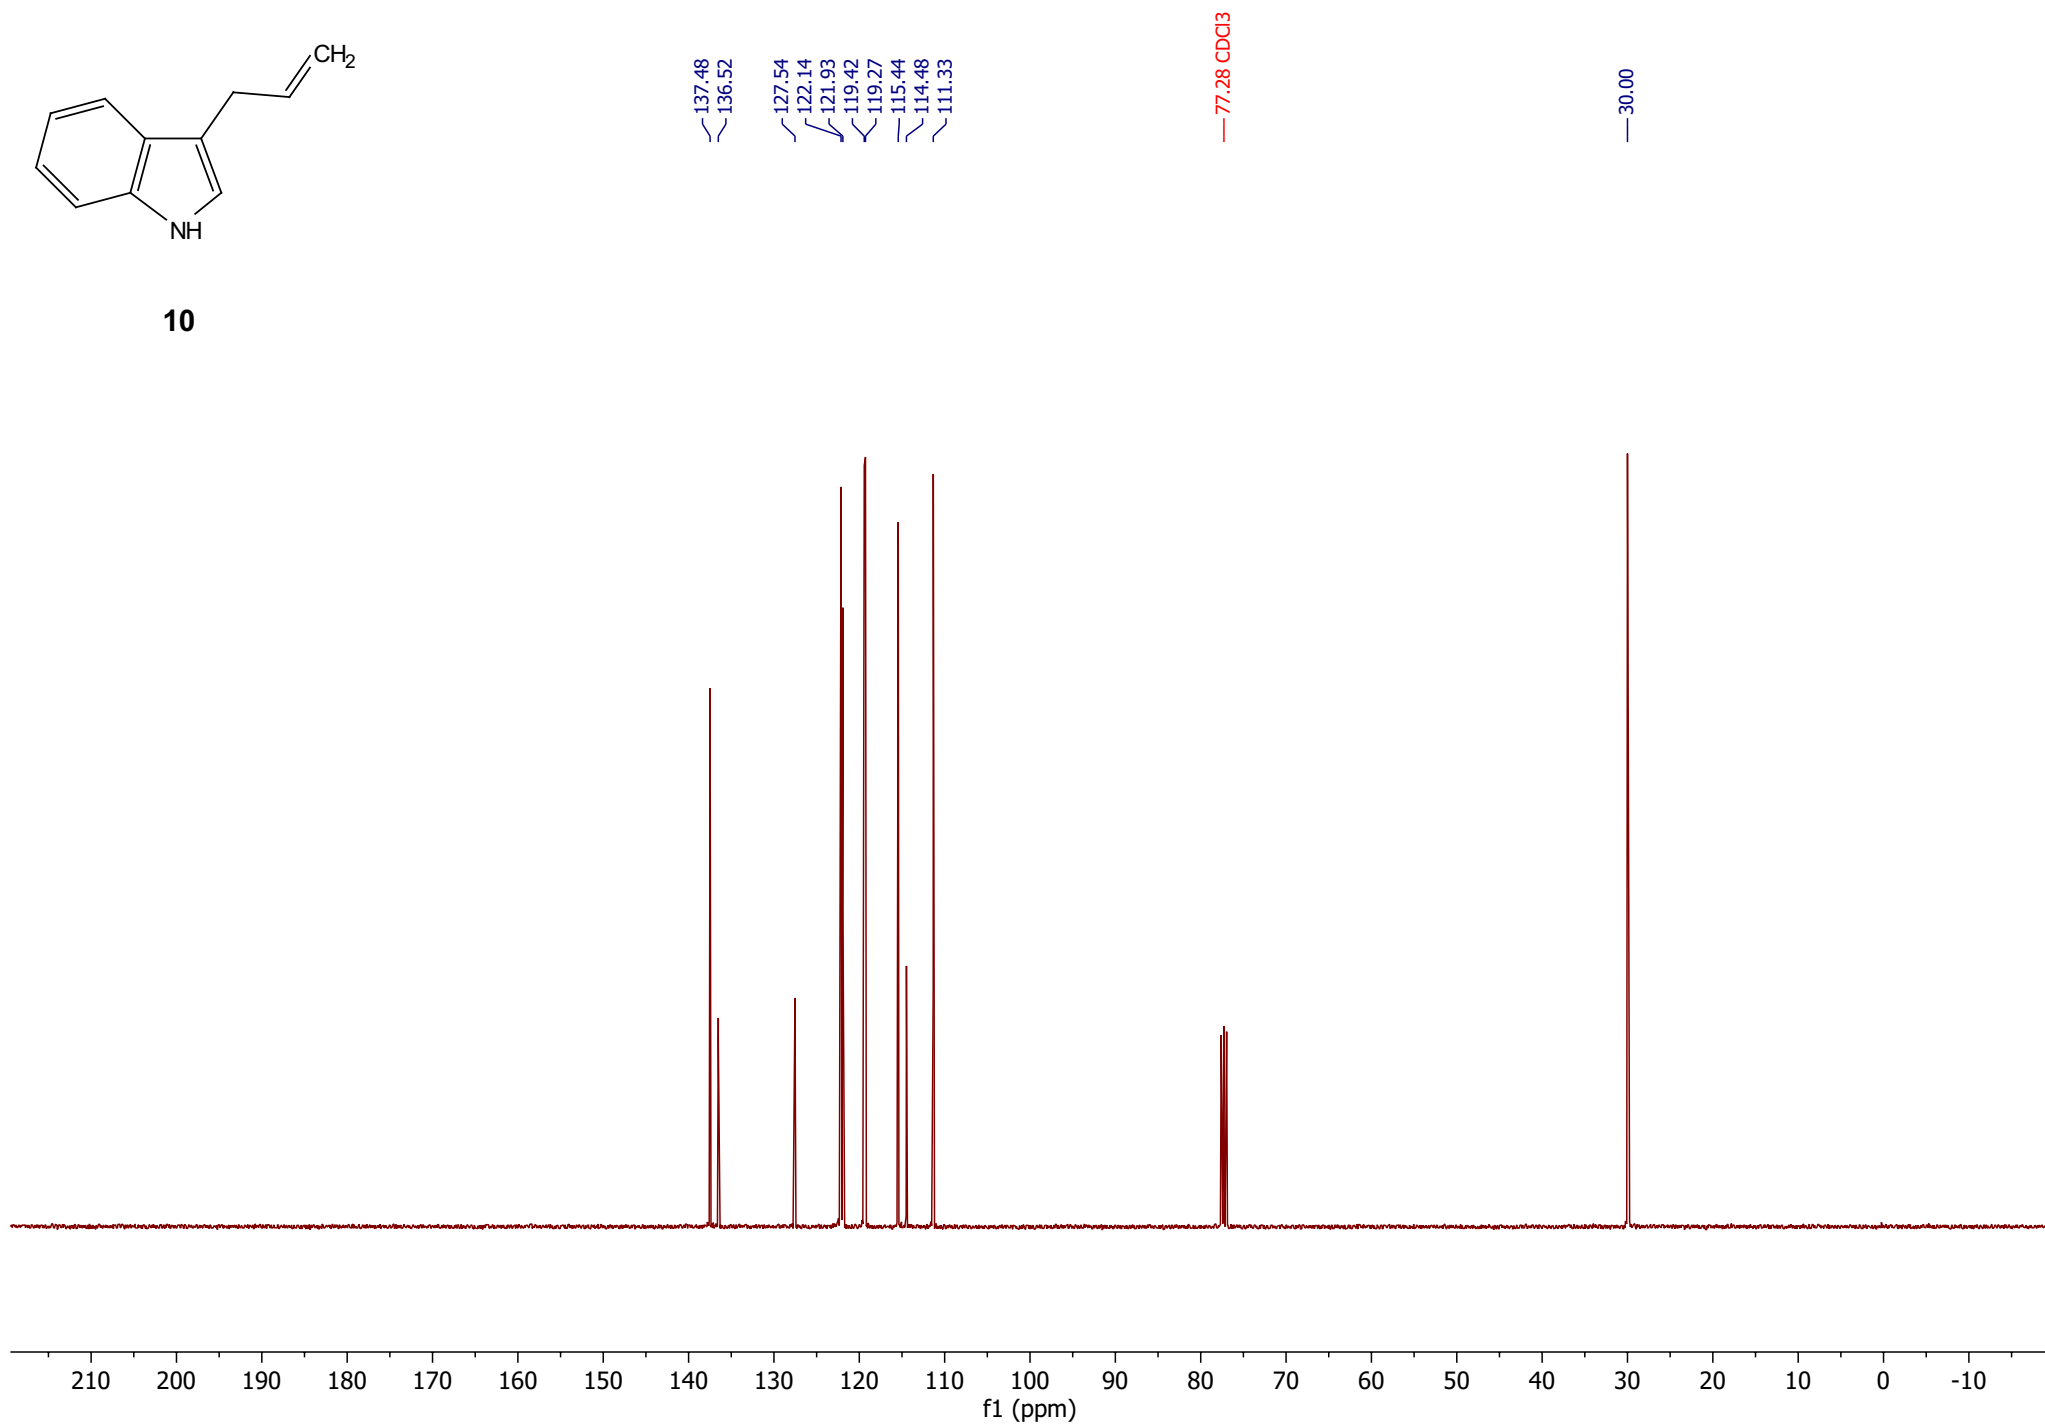

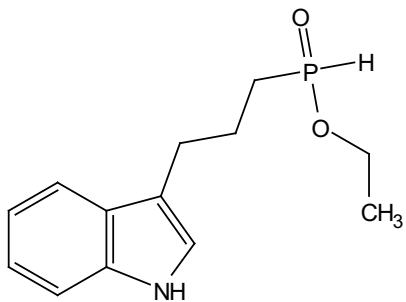

11

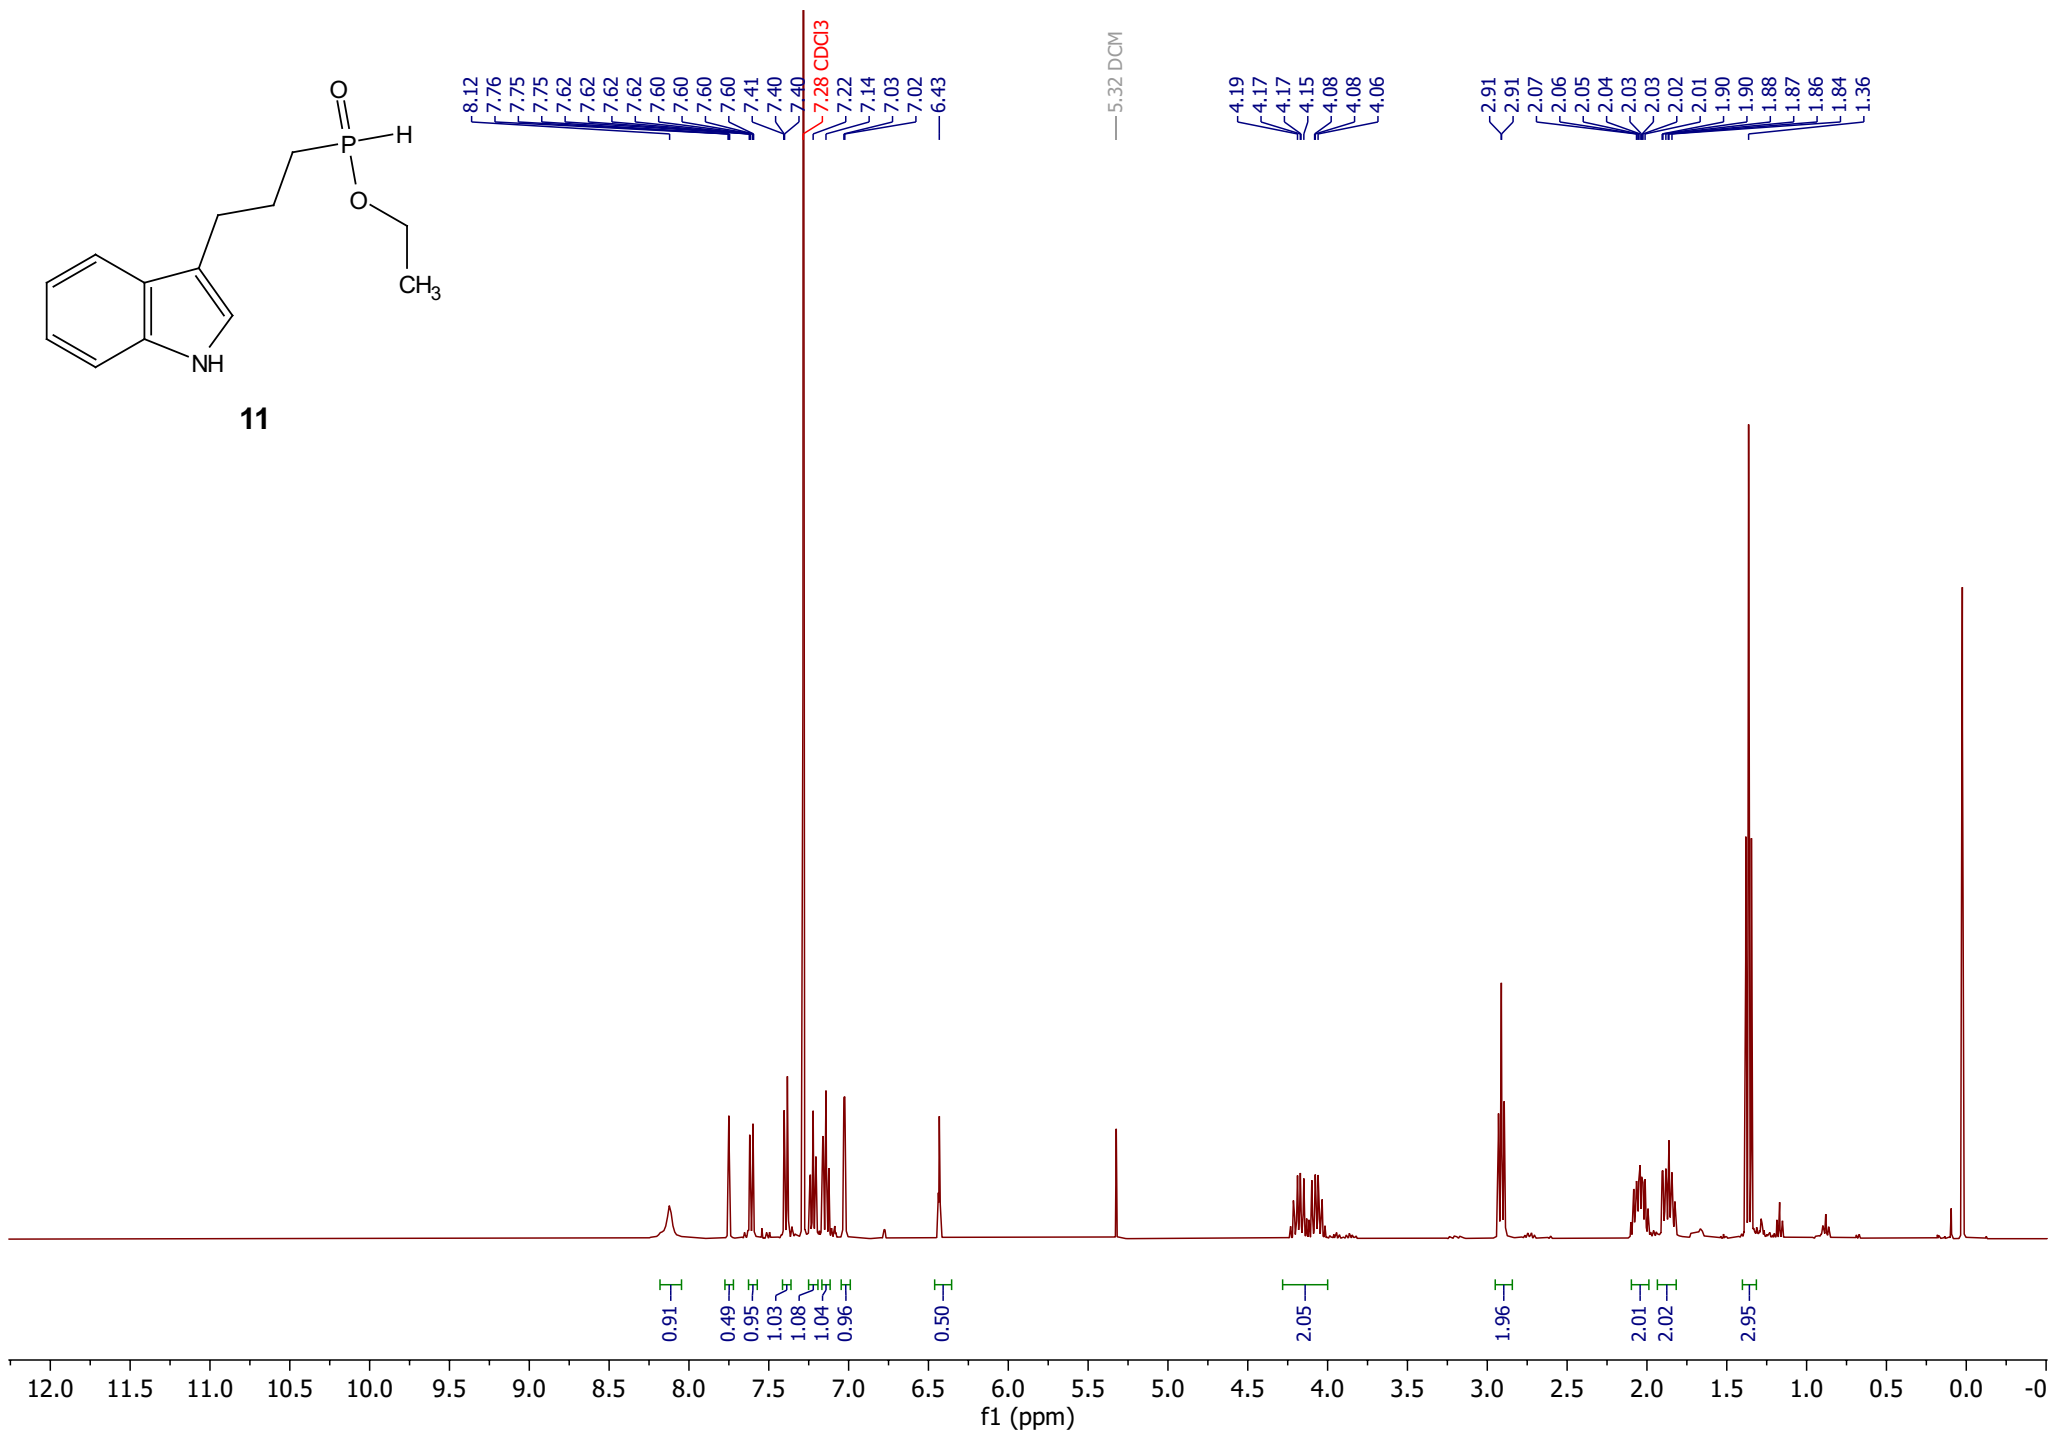

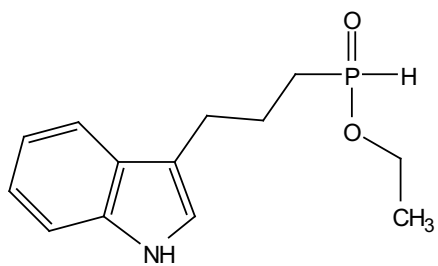

11

—34.12

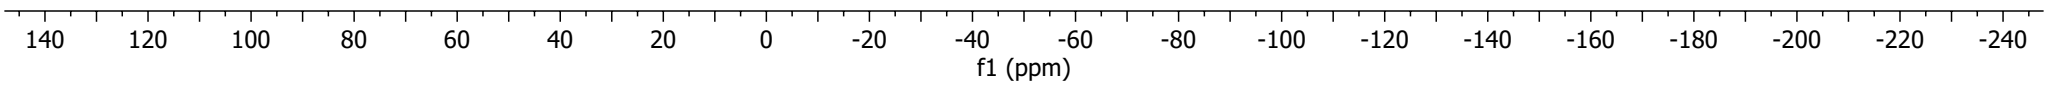



11

41.00  
37.74

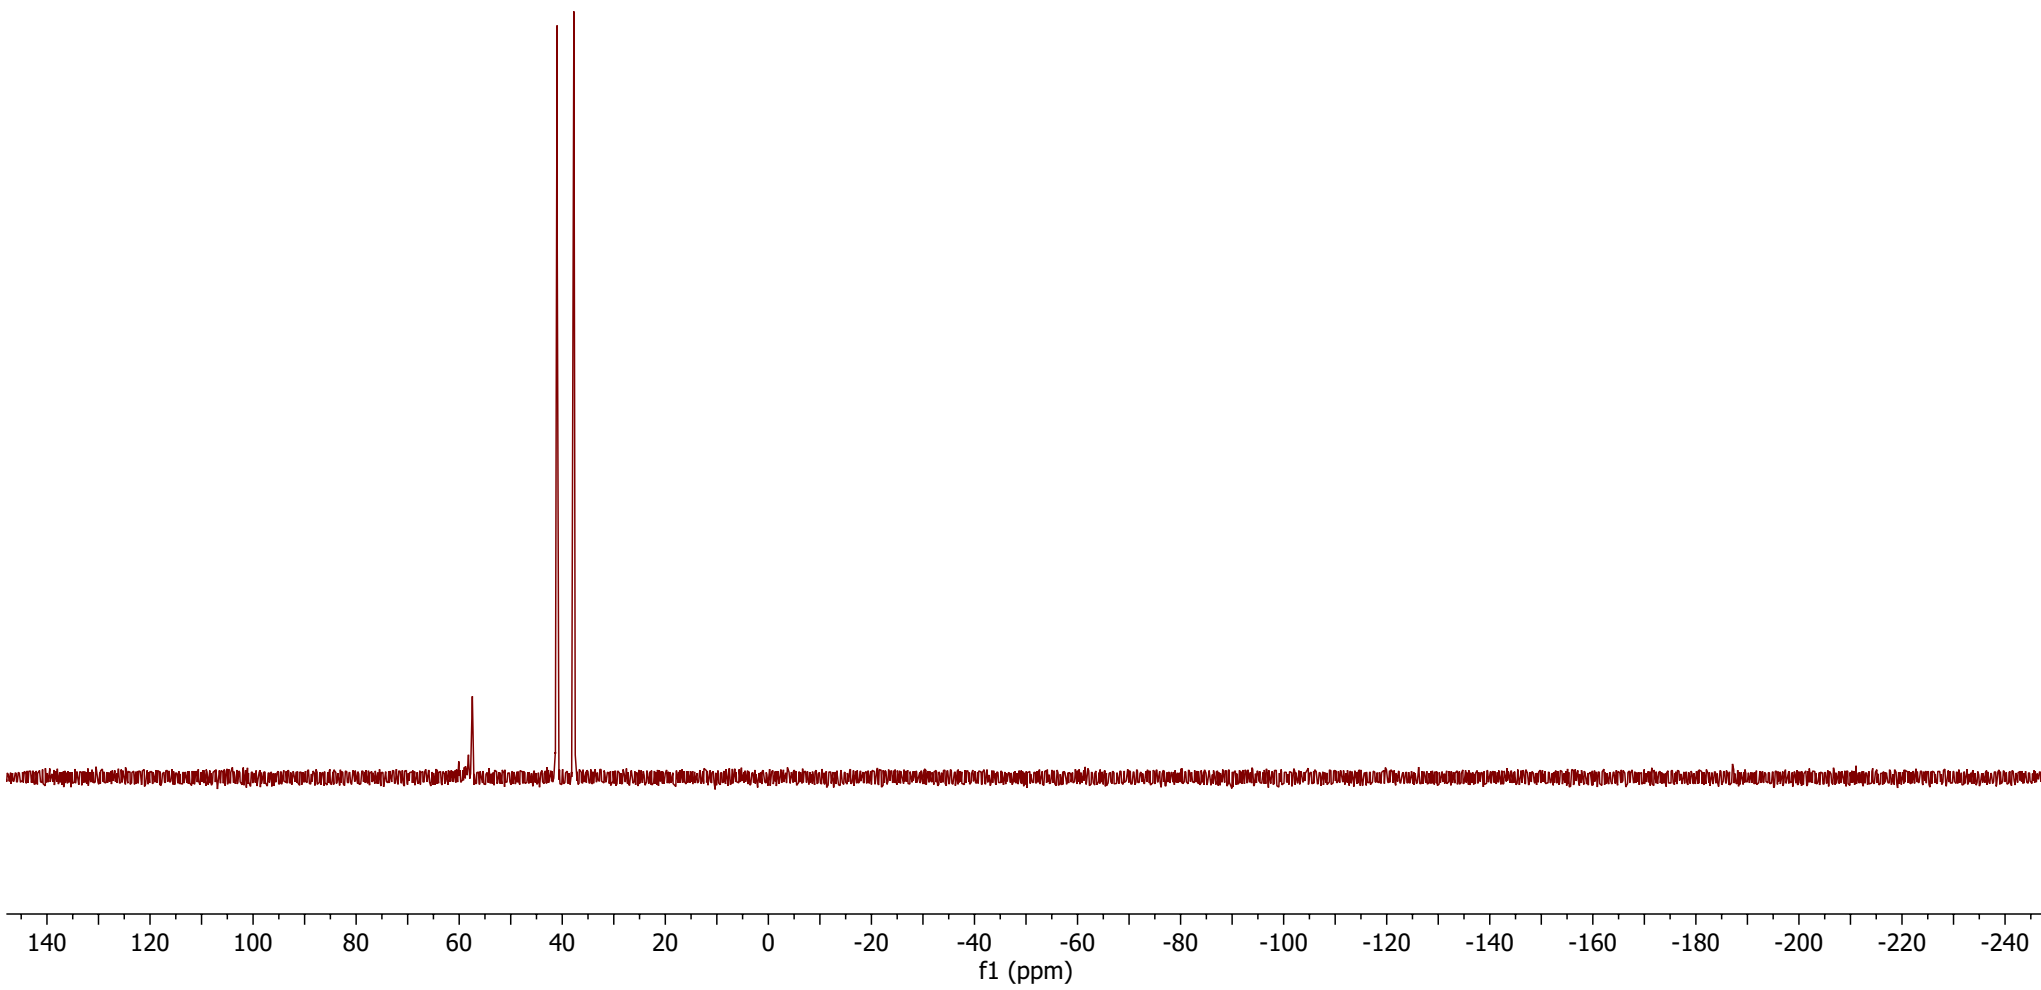



11

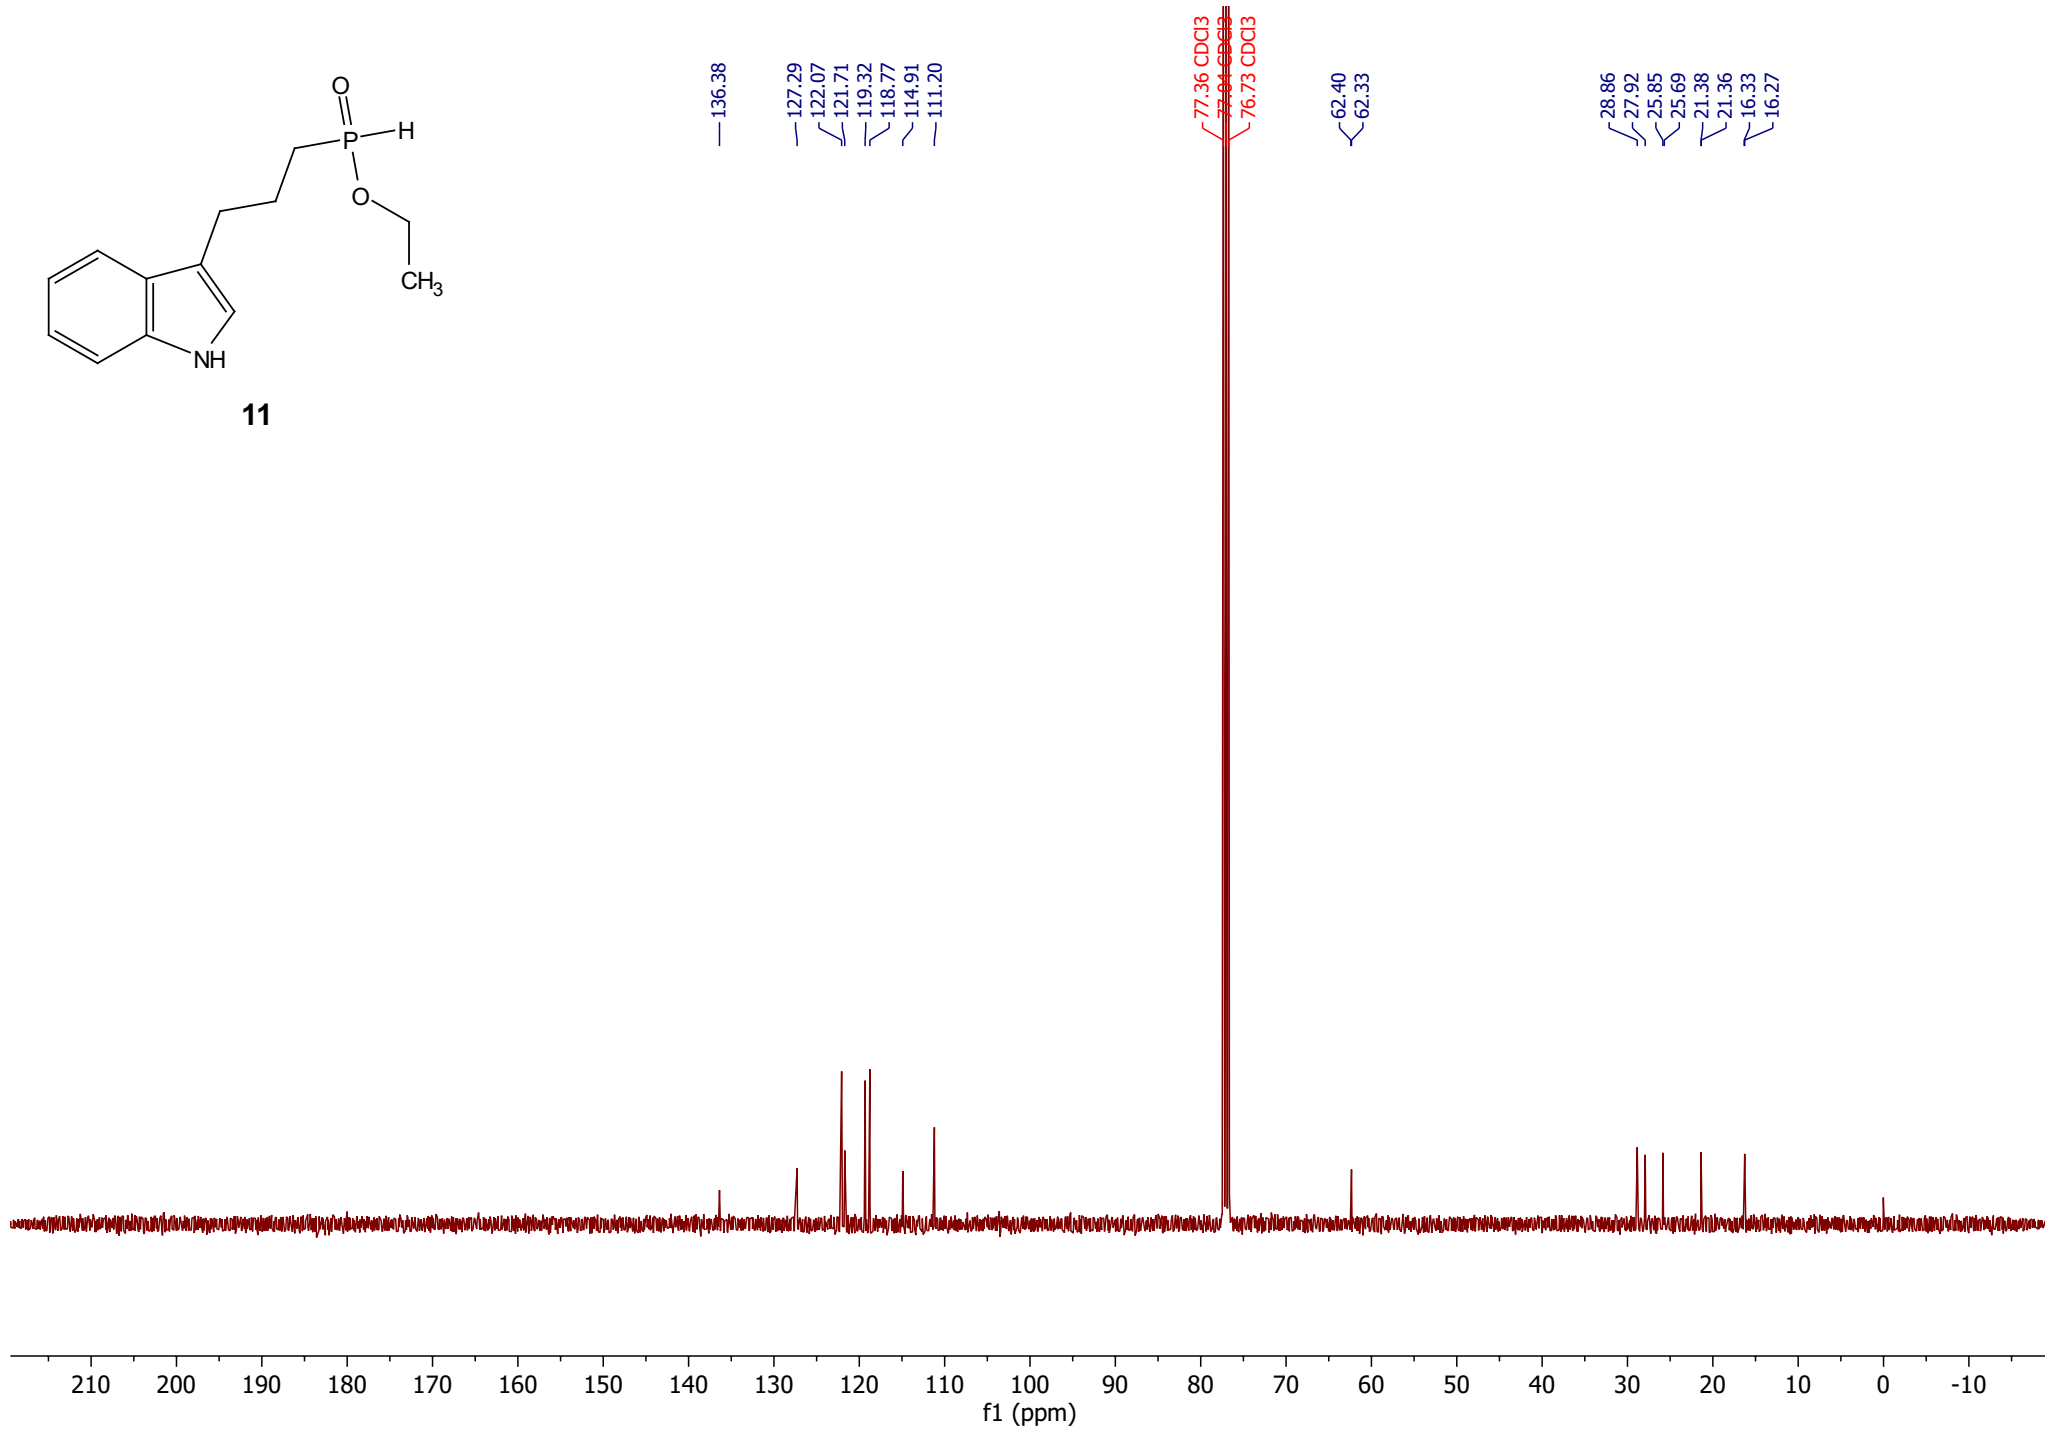

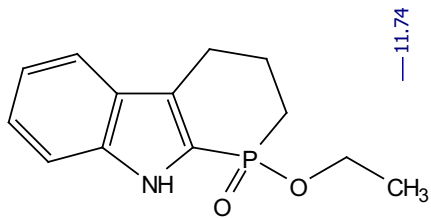

12

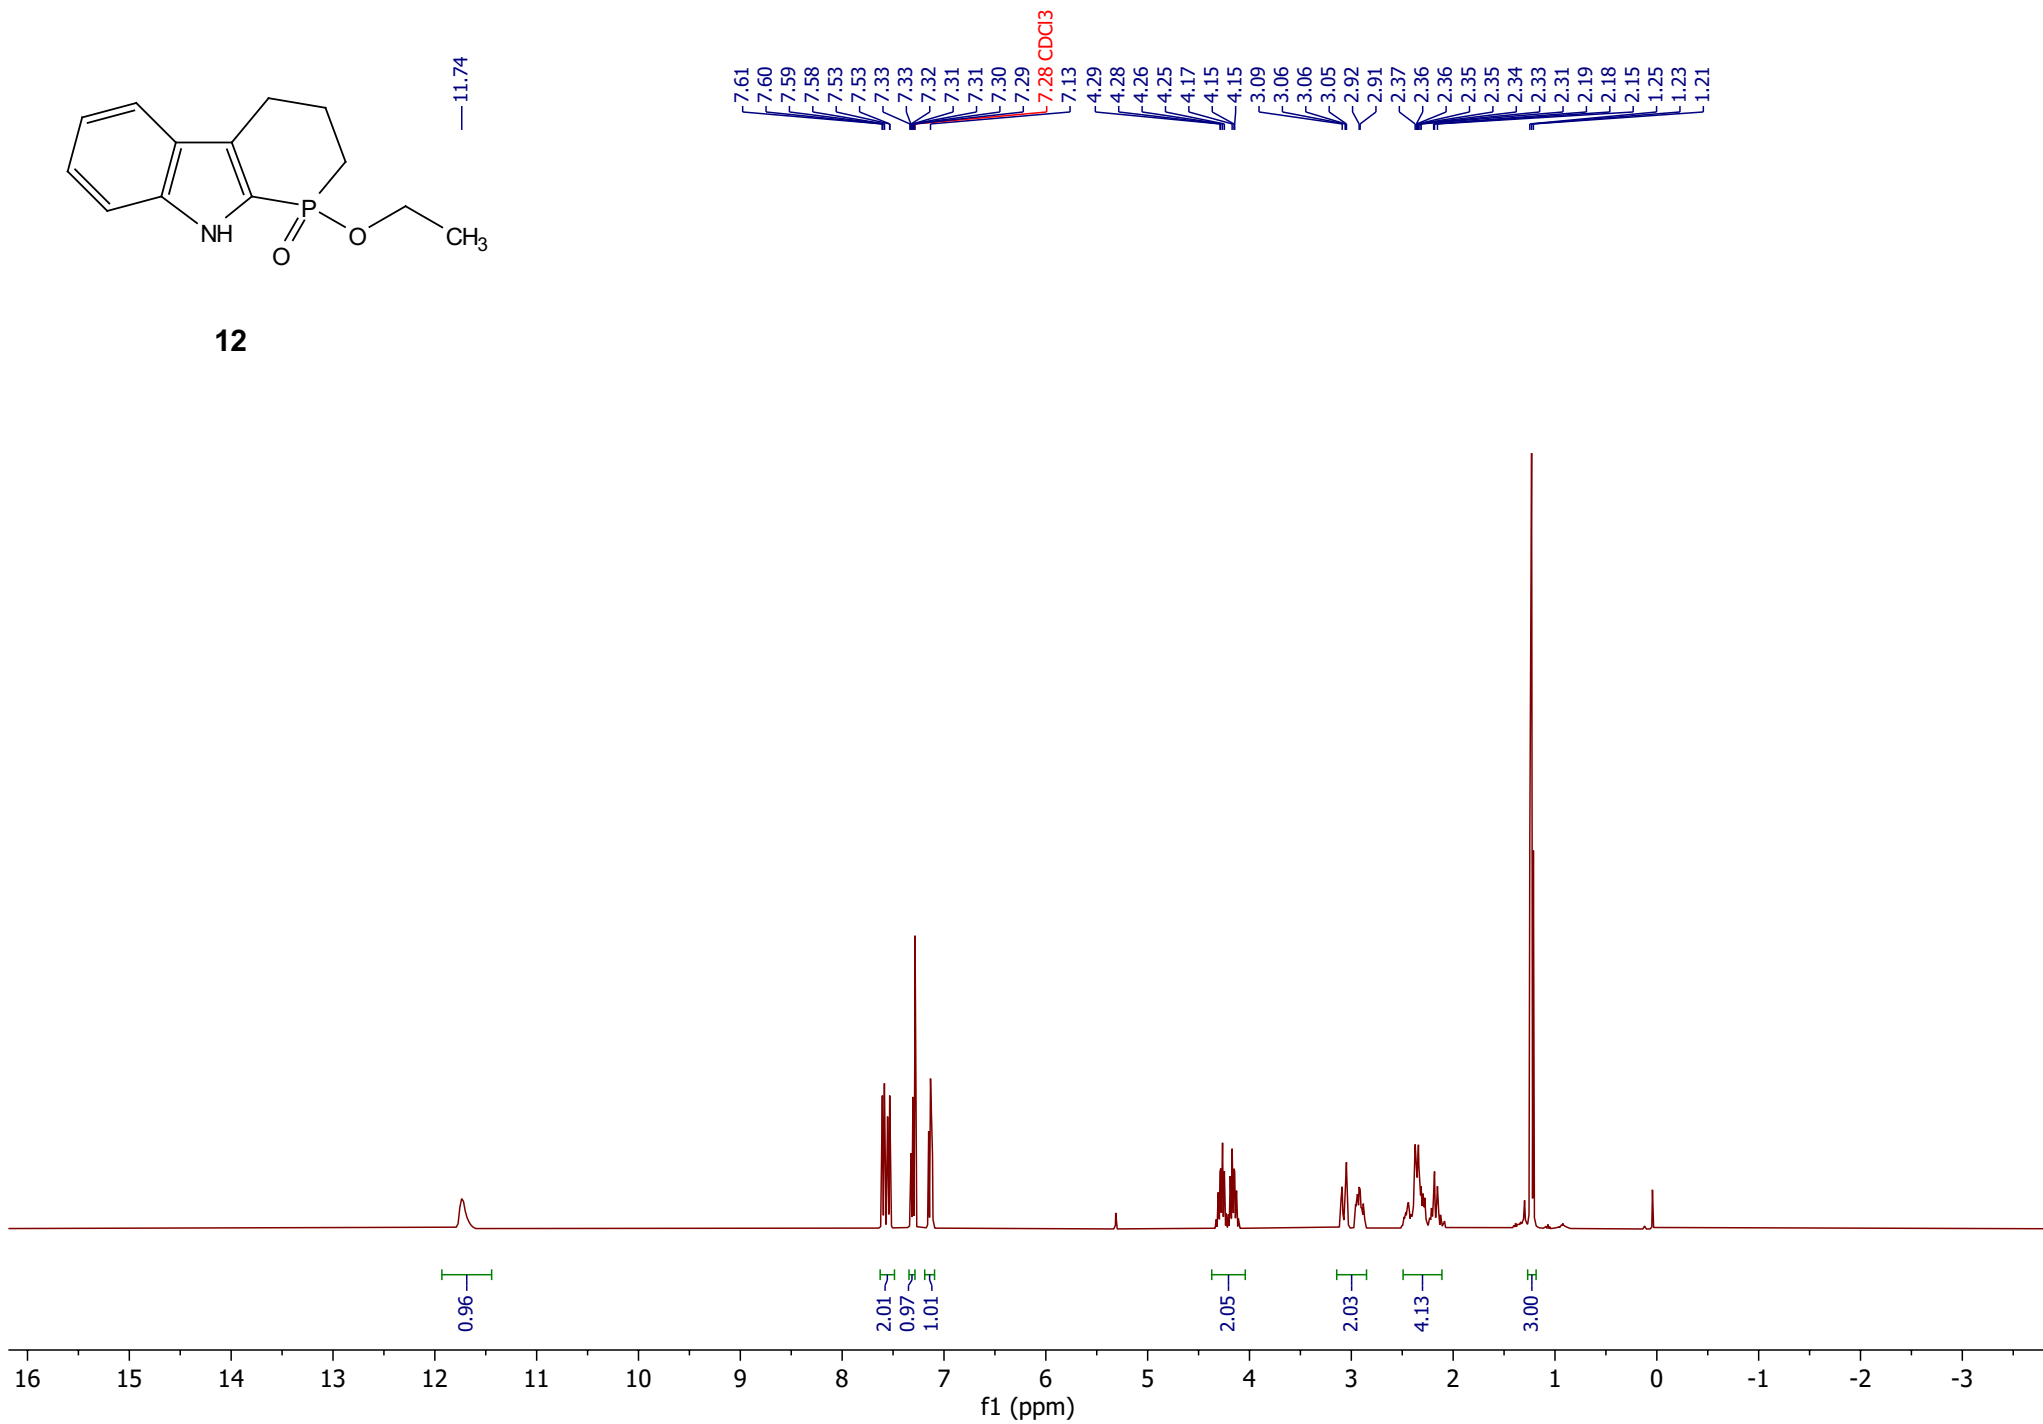



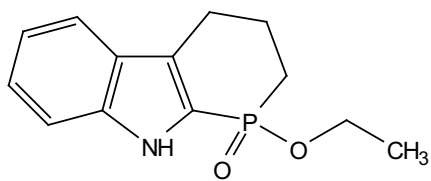

12

—34.12

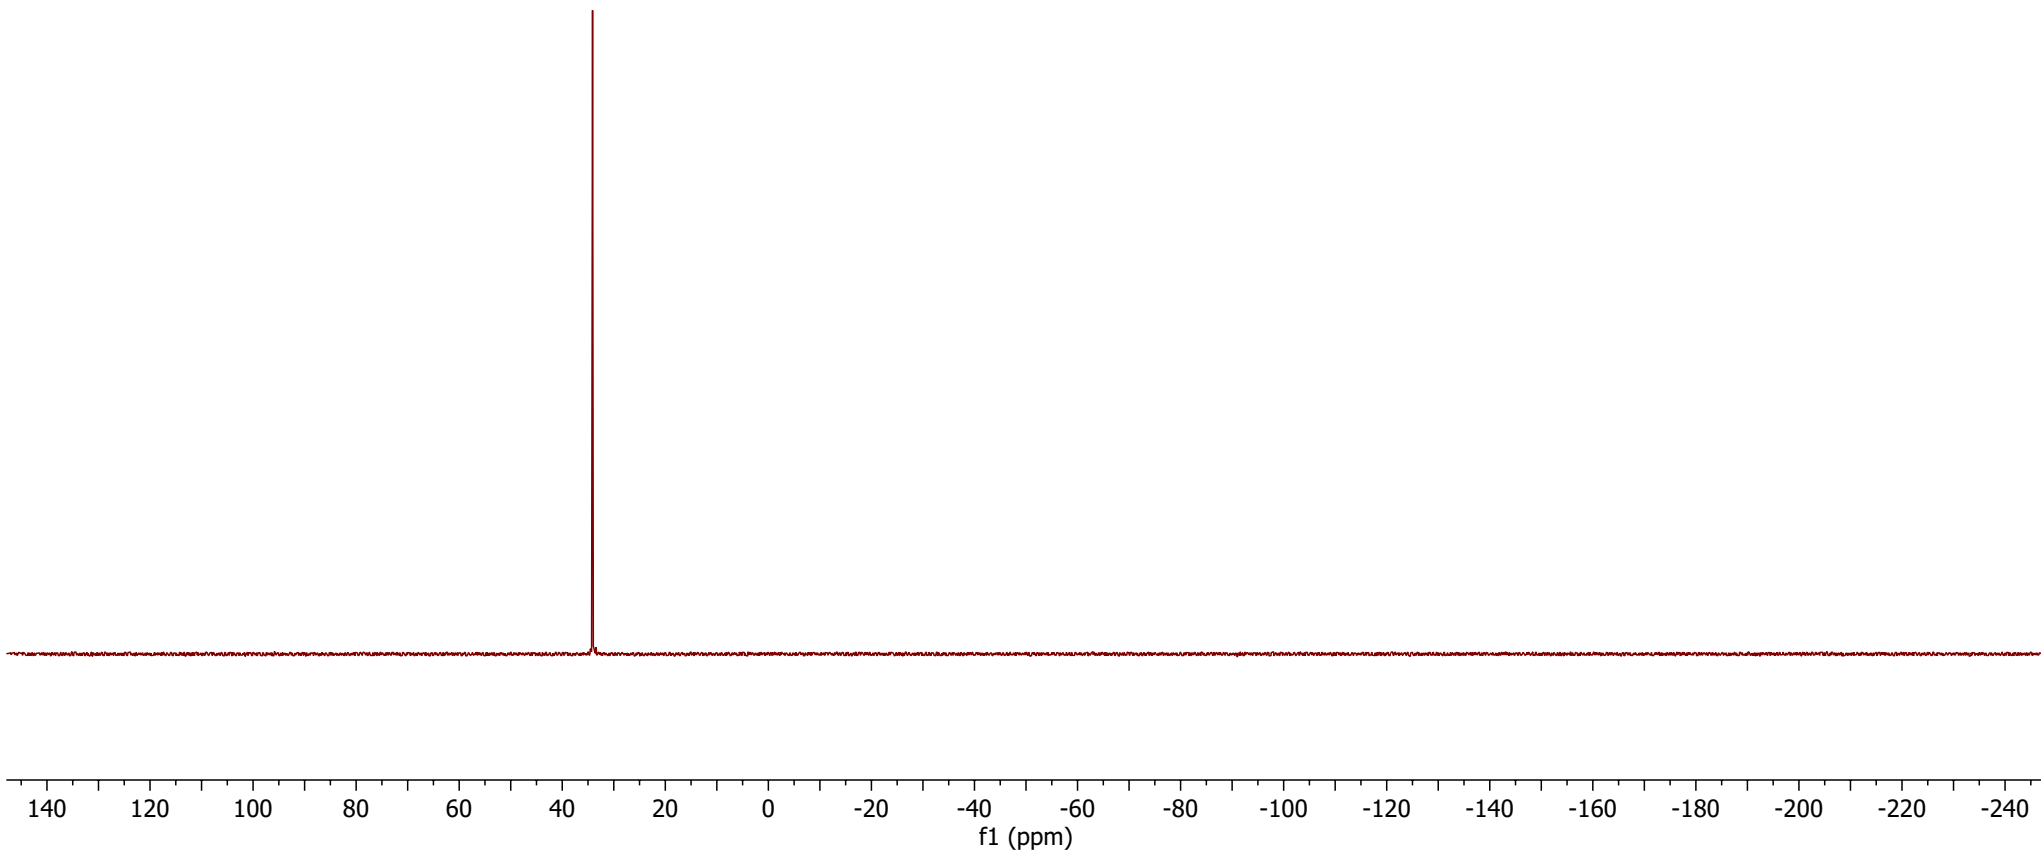



12

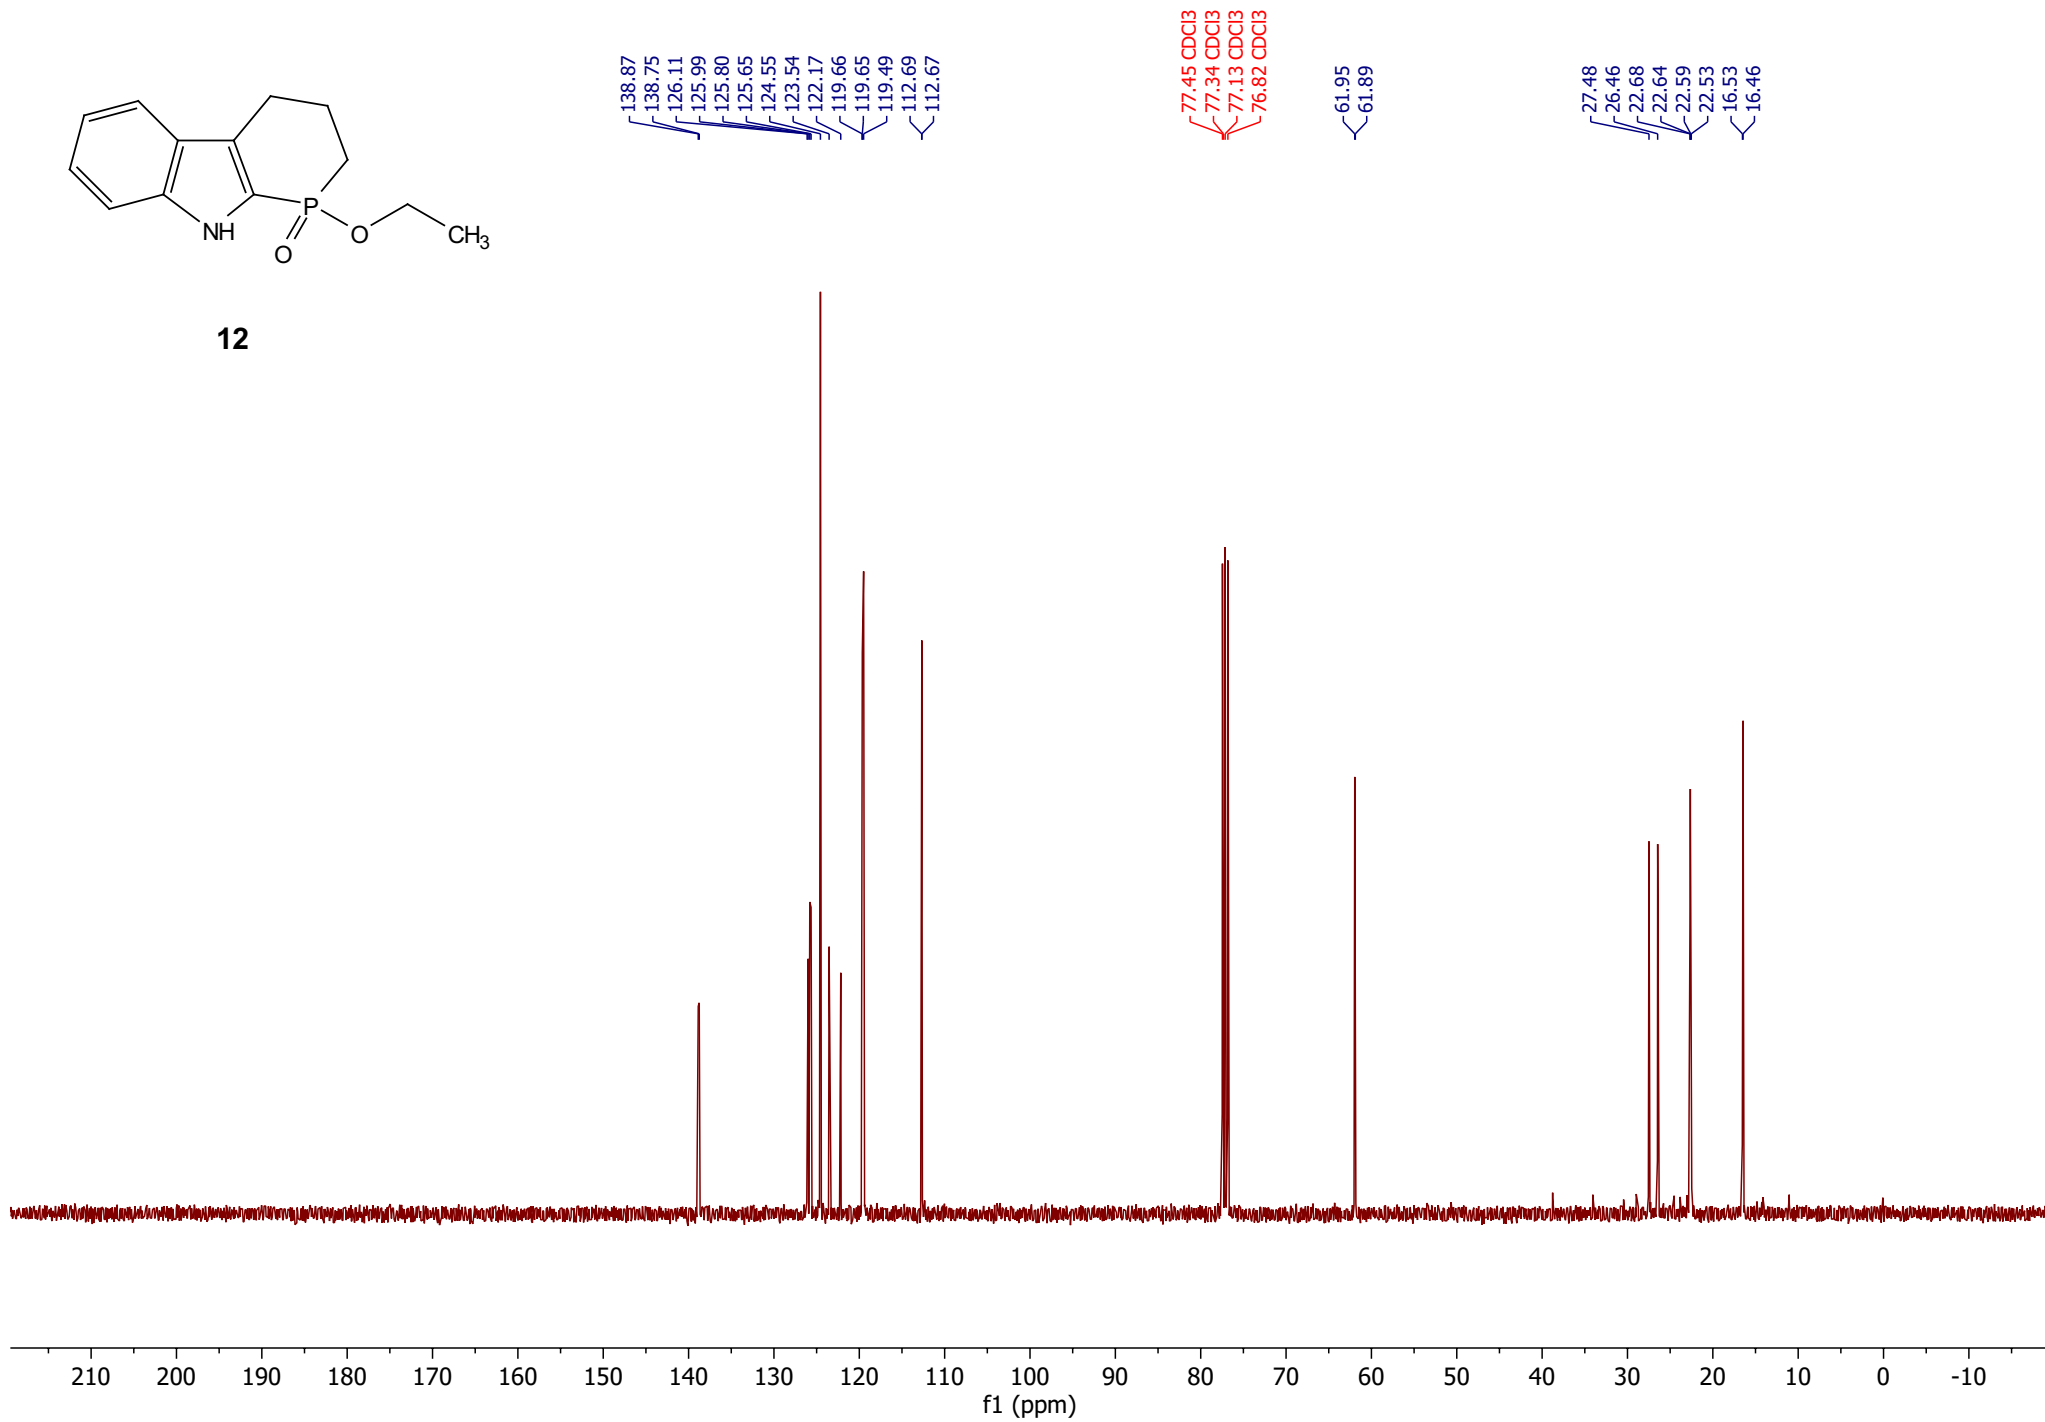

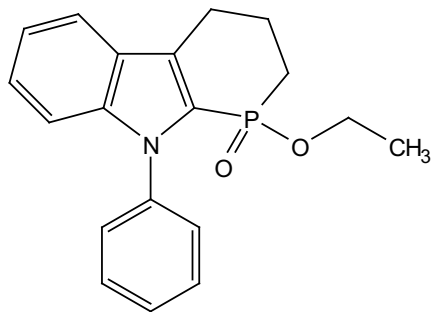

13a

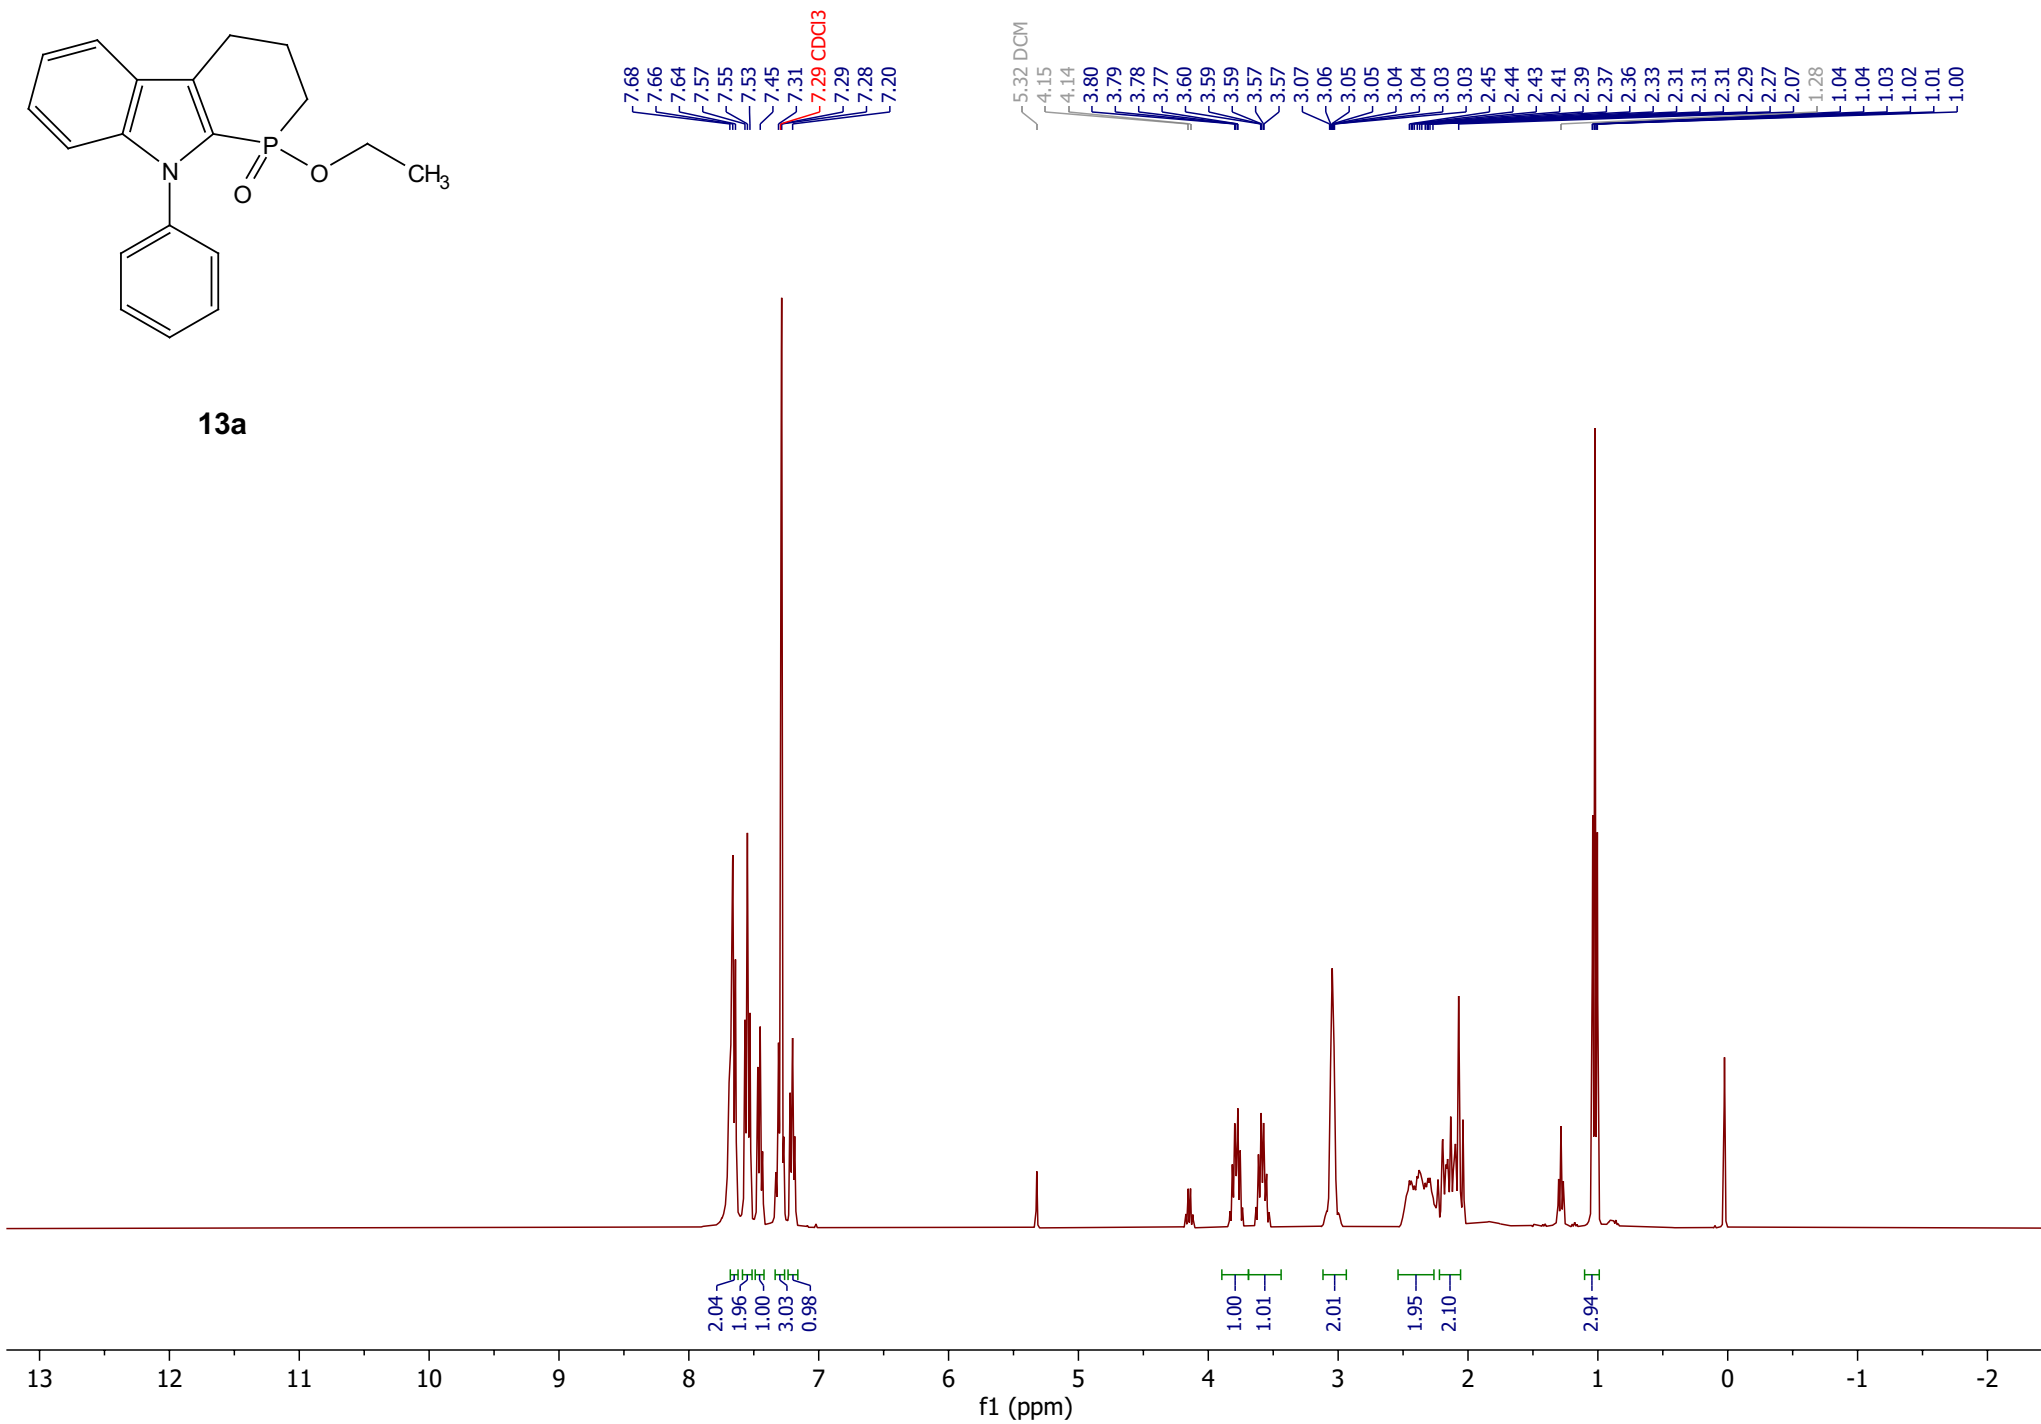



13a

—32.24

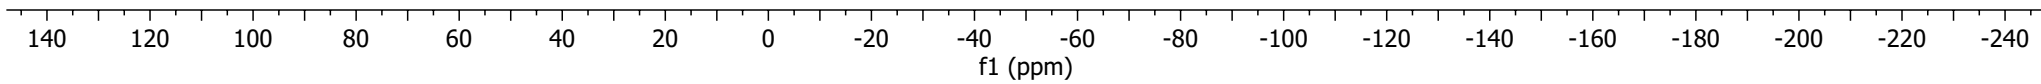

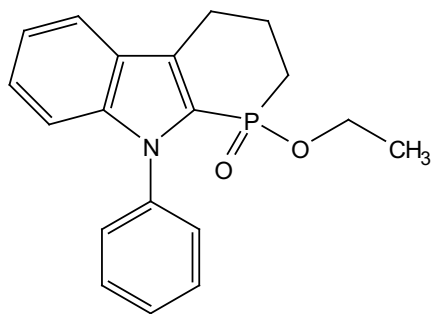

13a

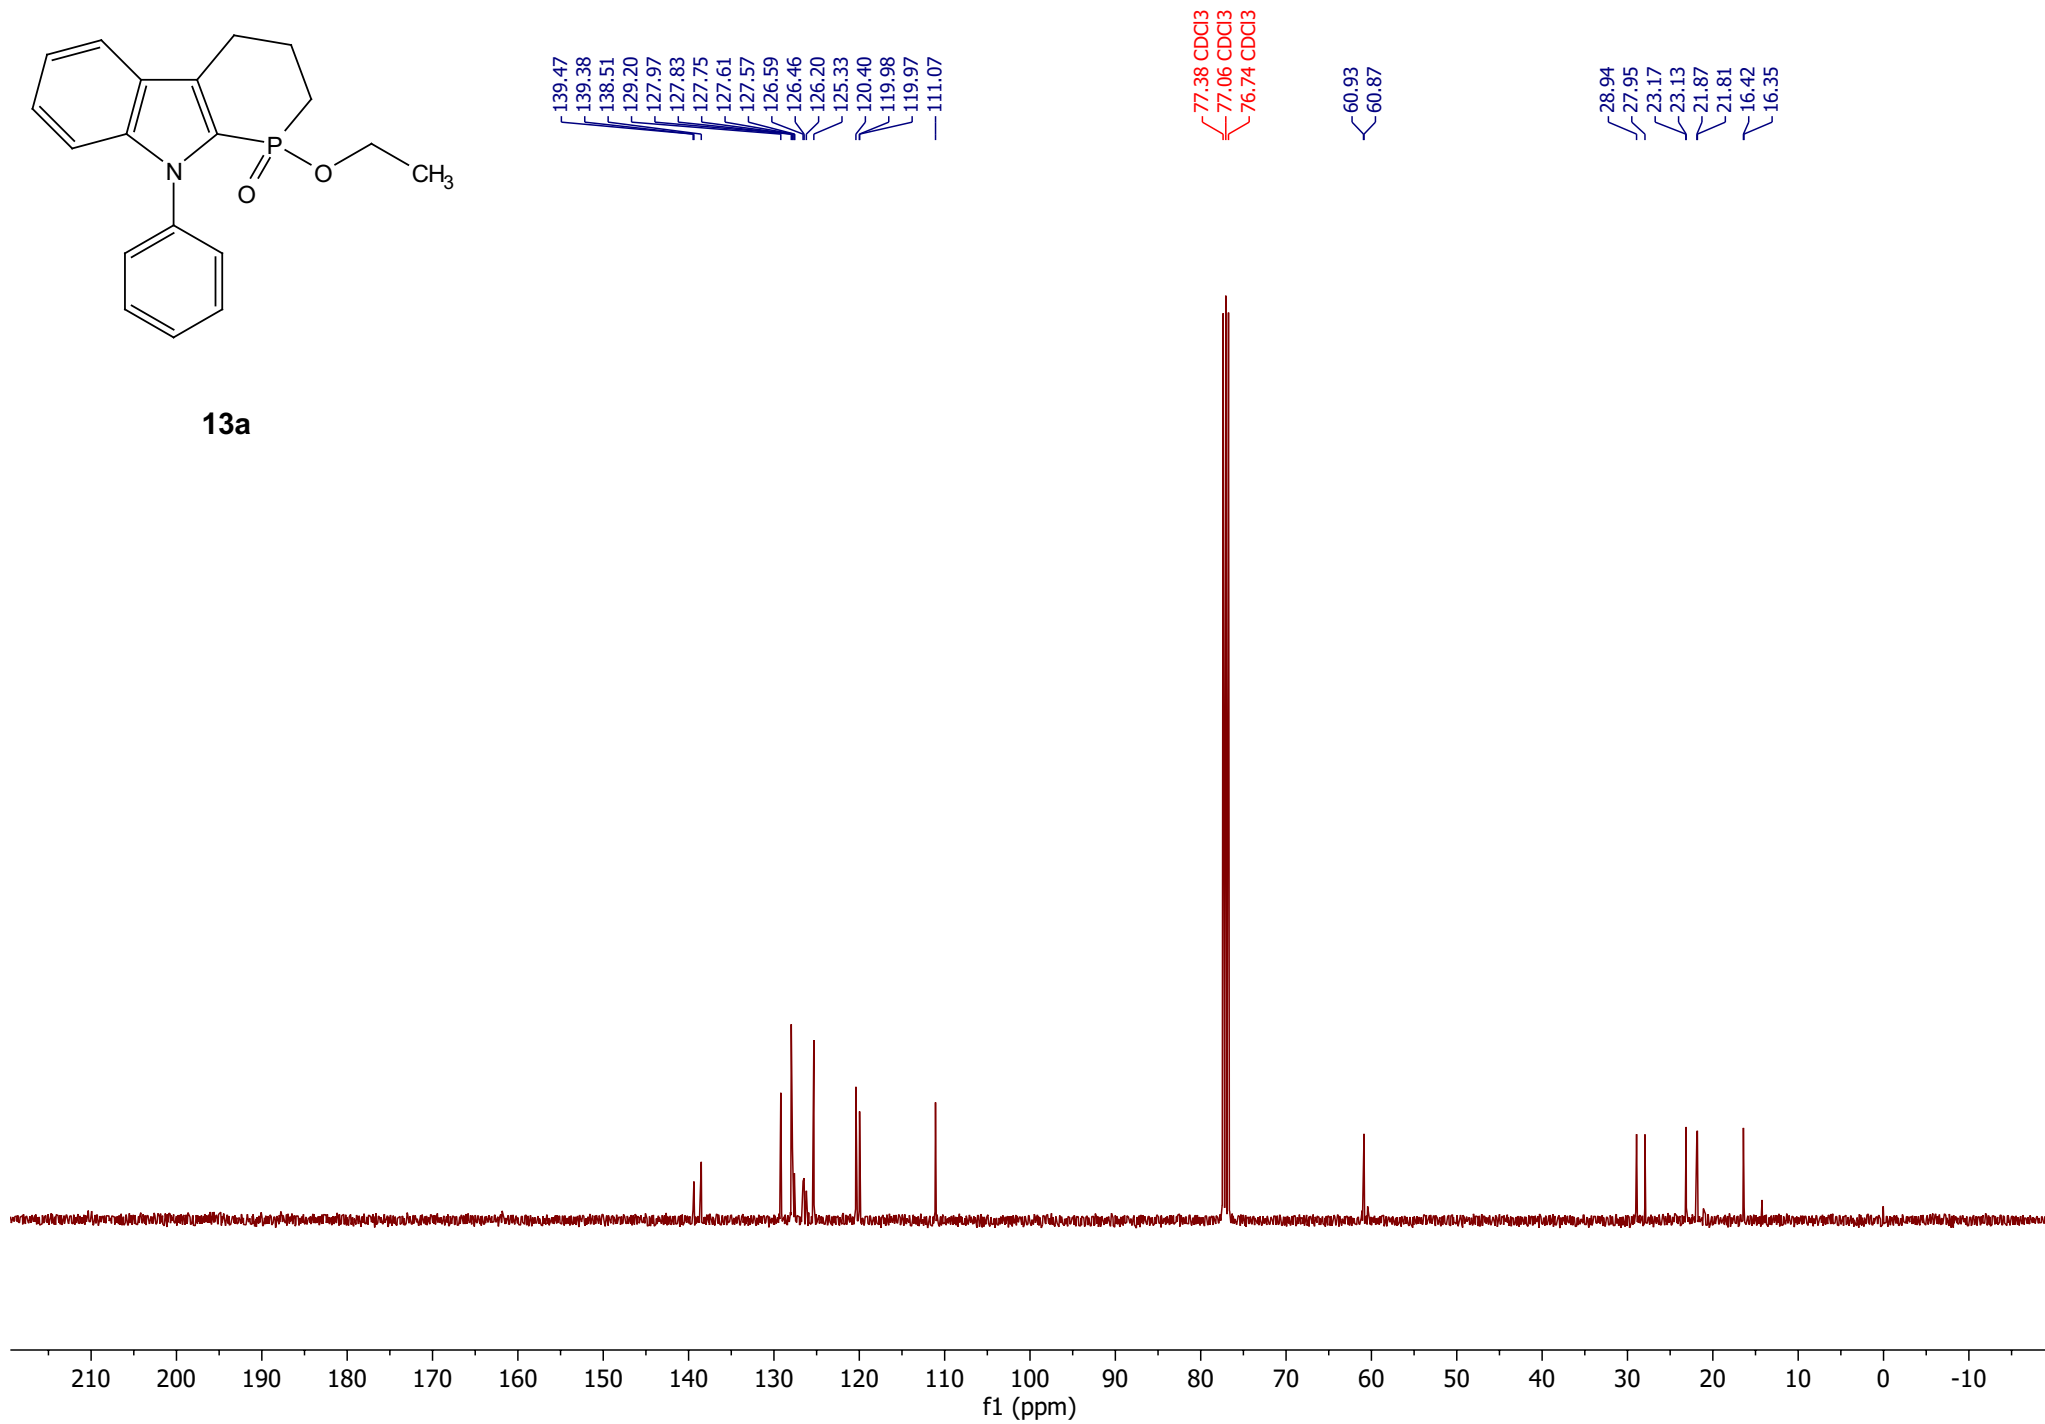

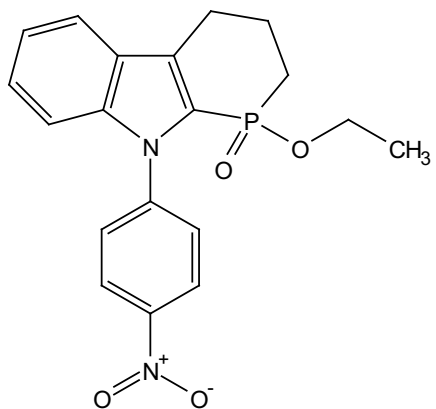

13b

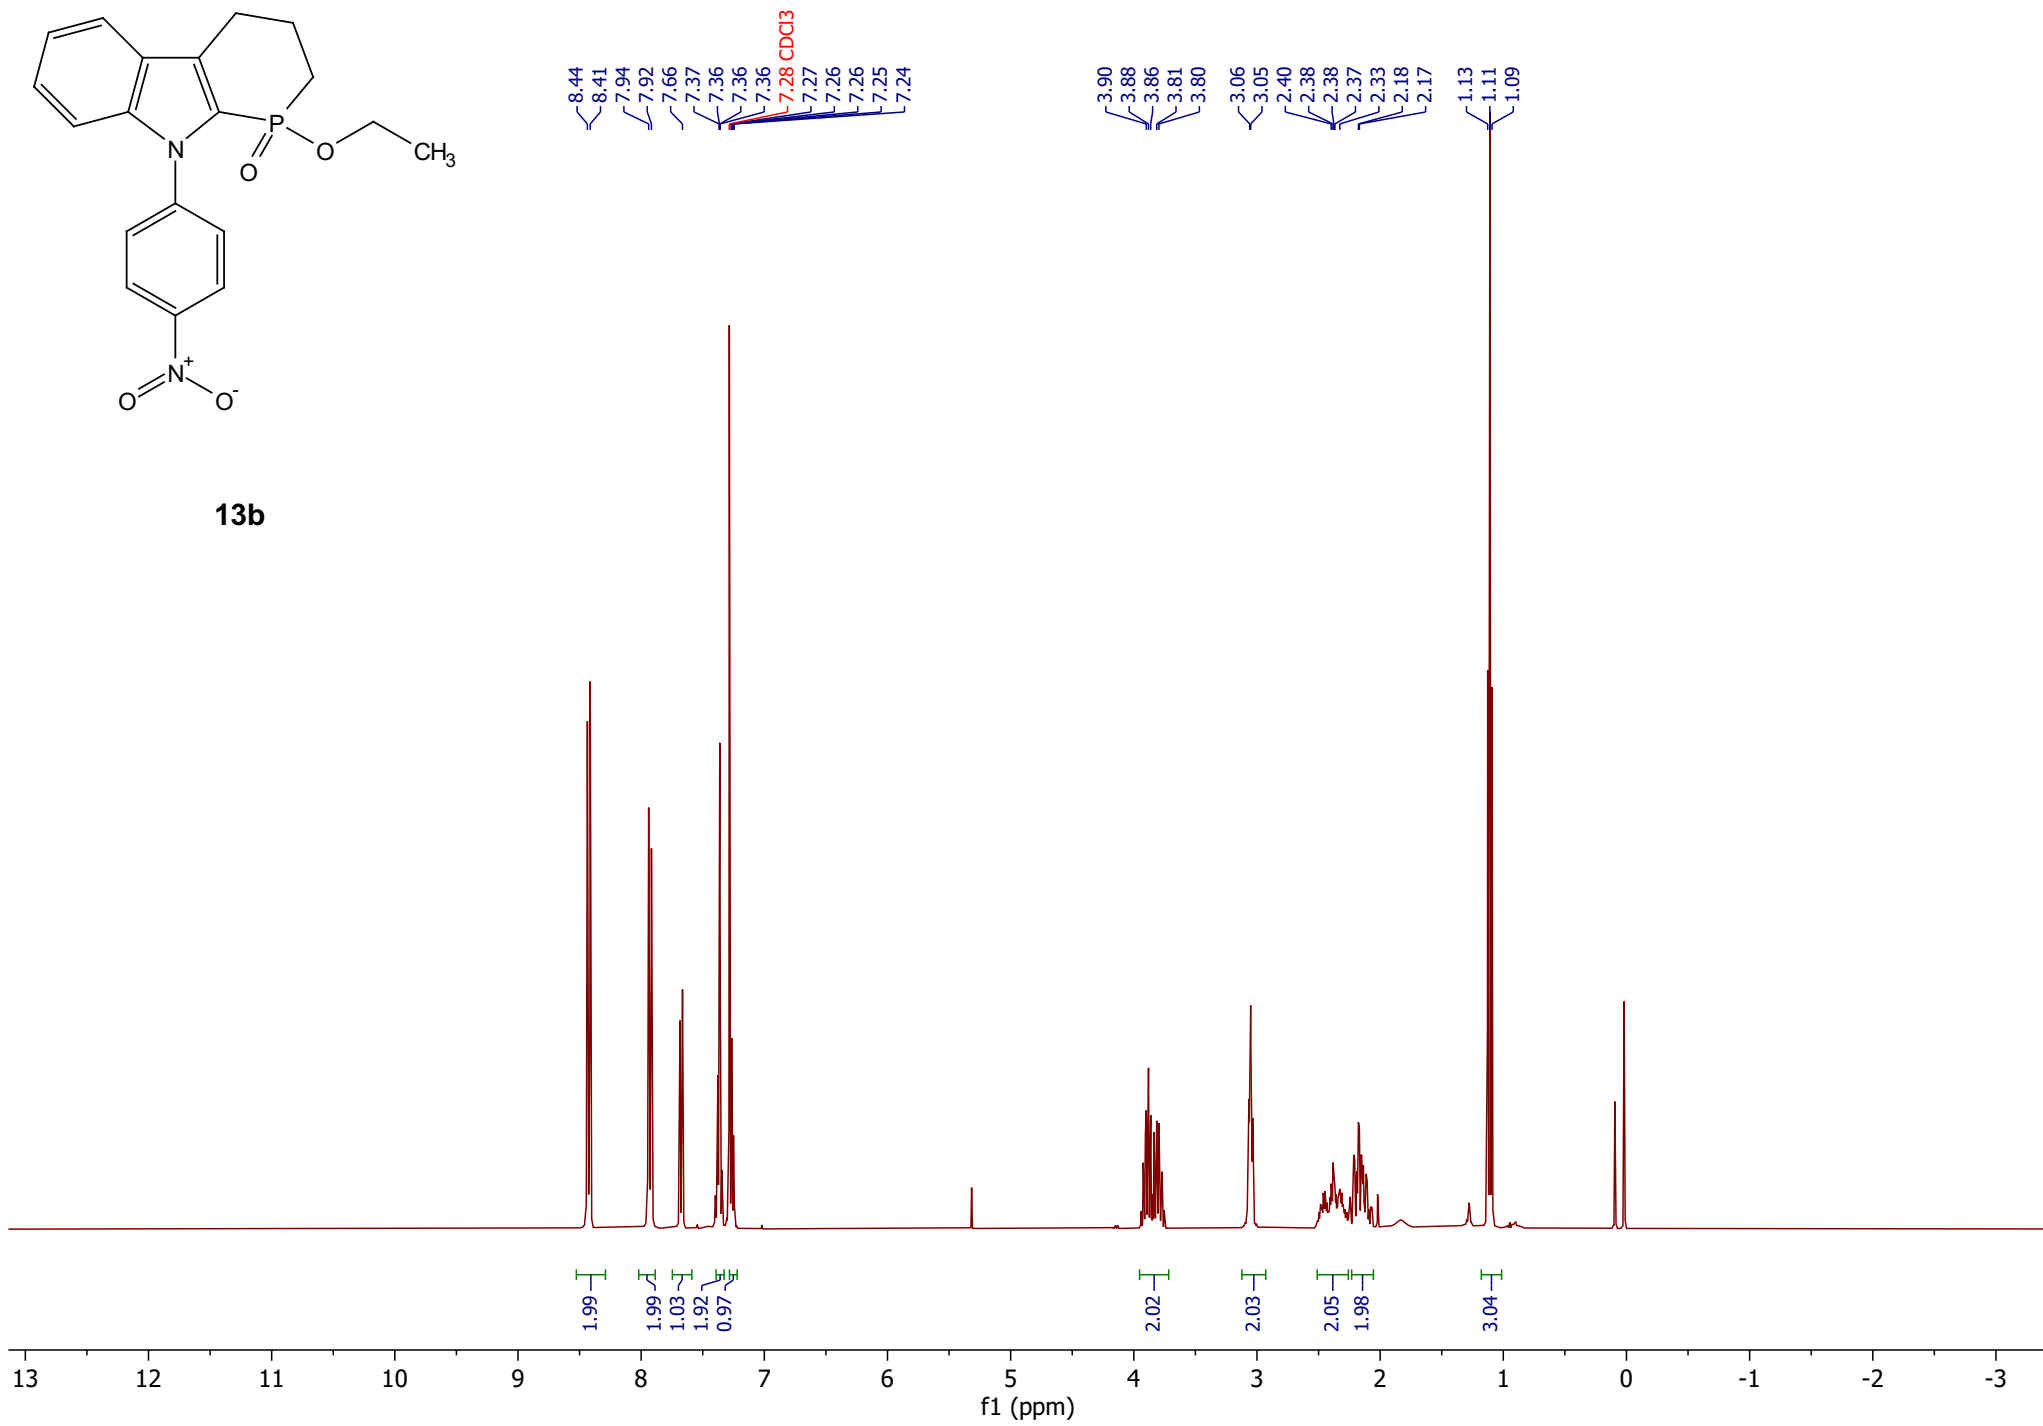



13b

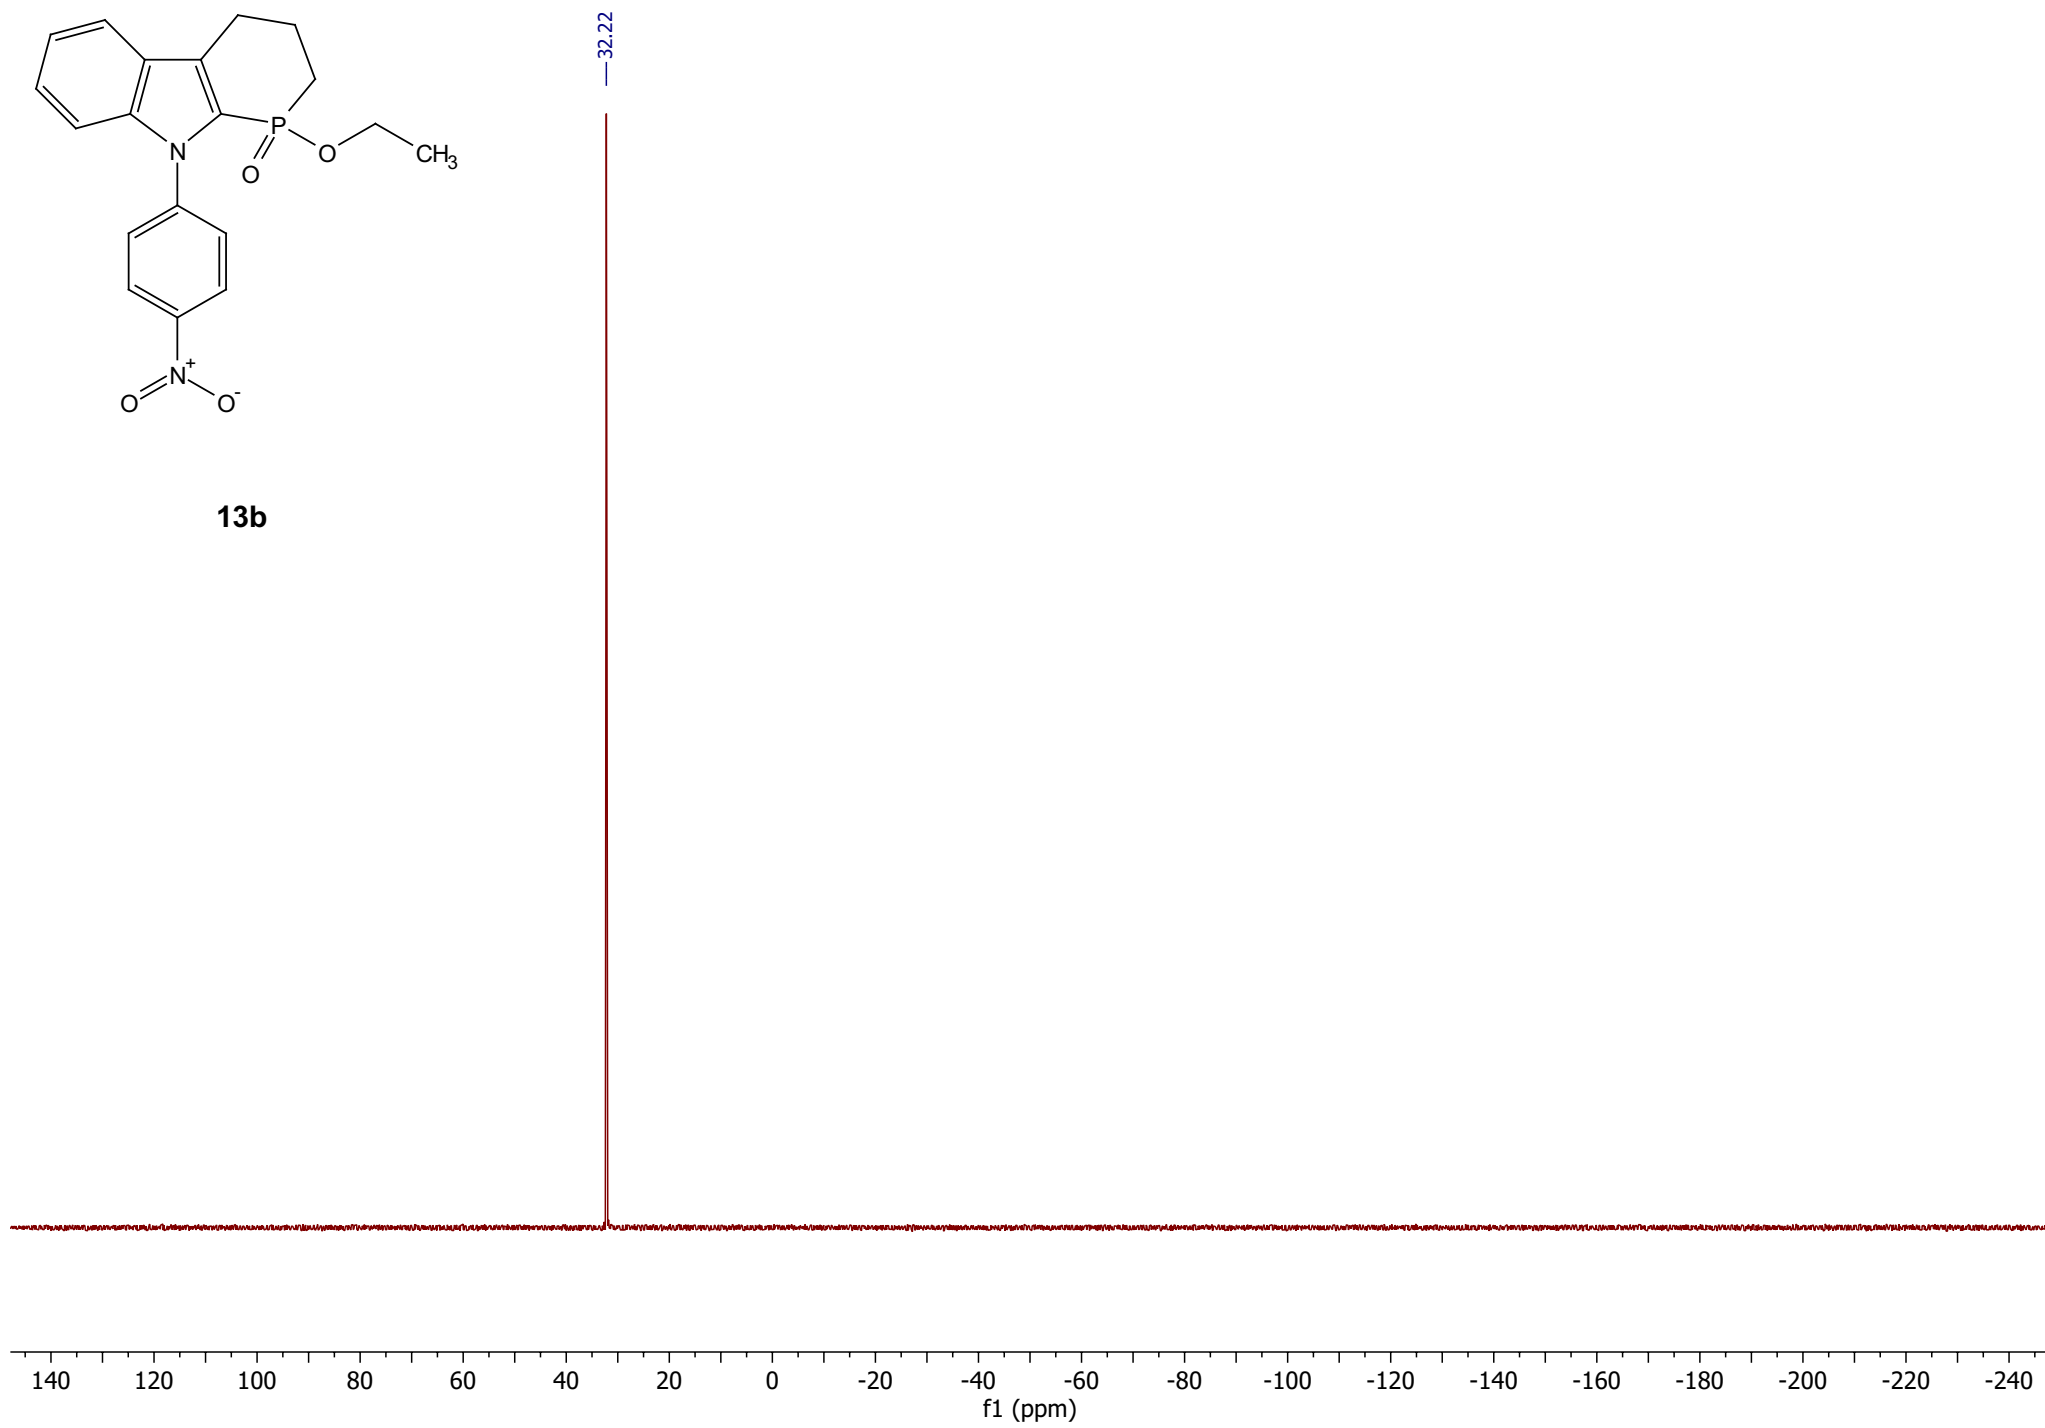

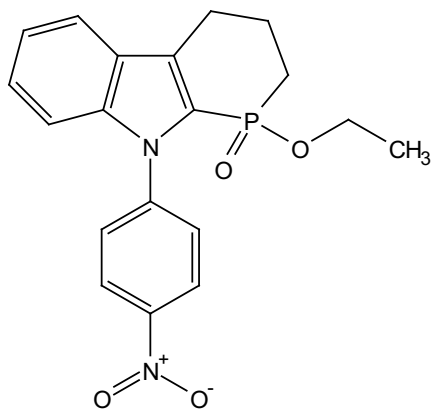

13b

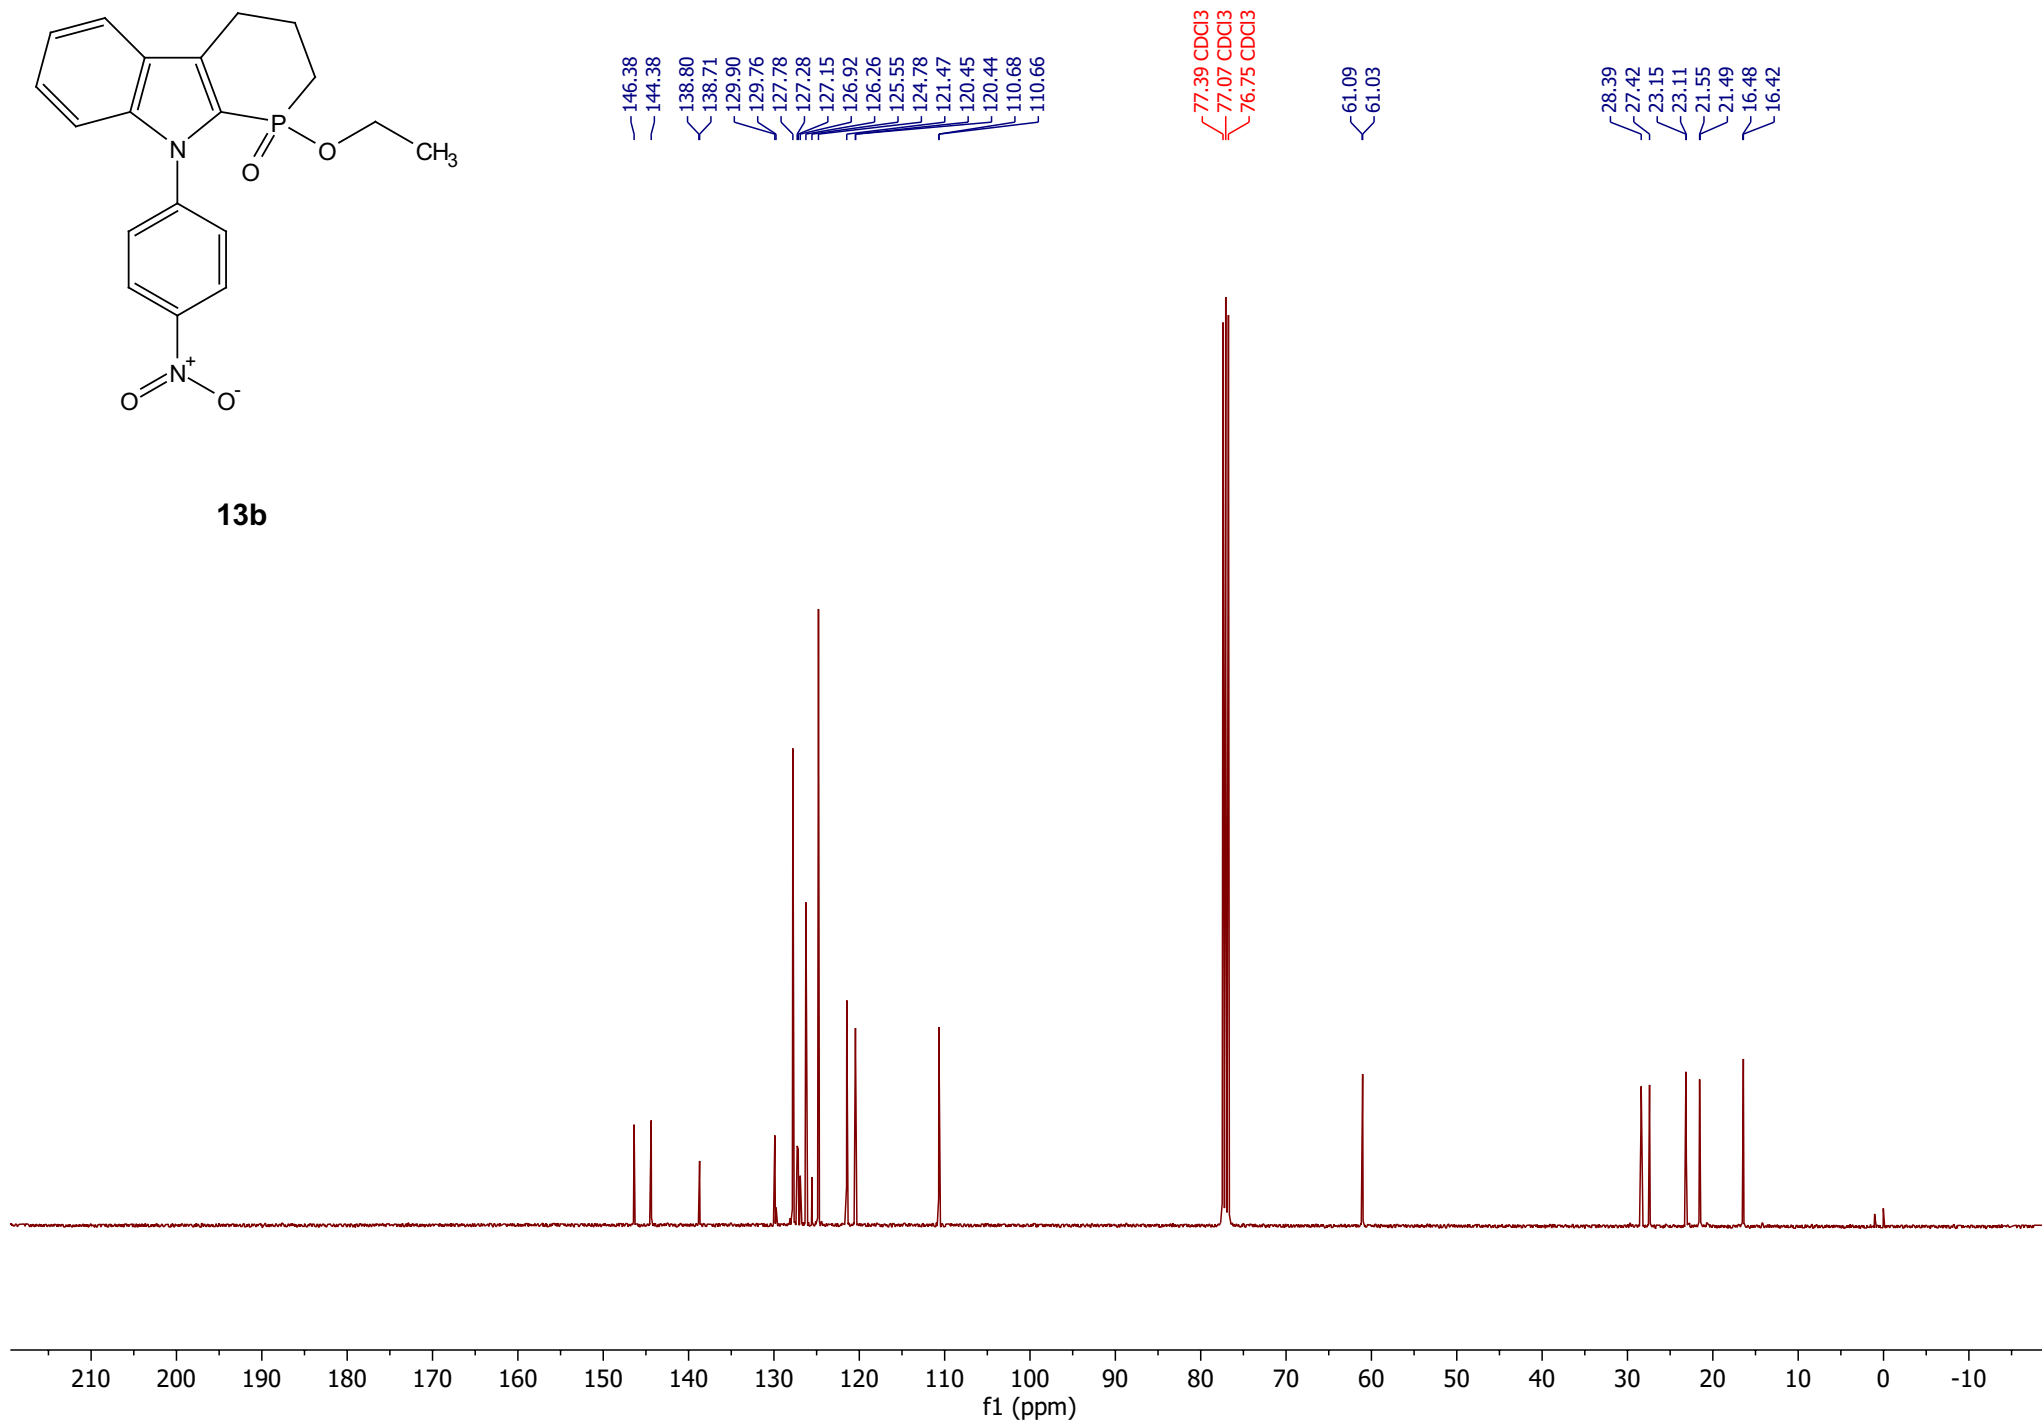



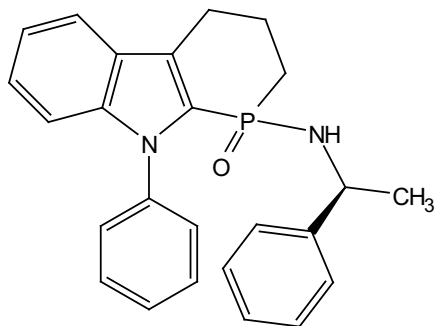

**14a**

7.87  
7.87  
7.68  
7.66  
7.59  
7.57  
7.57  
7.55  
7.46  
7.44  
7.43  
7.36  
7.36  
7.34  
7.34  
7.32  
7.32  
7.25  
7.24  
7.23  
7.08  
7.08  
7.06  
7.06

3.76  
3.76  
3.75  
3.74  
3.05  
3.04  
2.75  
2.74  
2.74  
2.47  
2.47  
2.35  
2.34  
2.34  
2.33  
2.33  
2.07  
2.07  
1.83  
1.47  
1.46  
1.44  
1.43  
0.94  
0.93

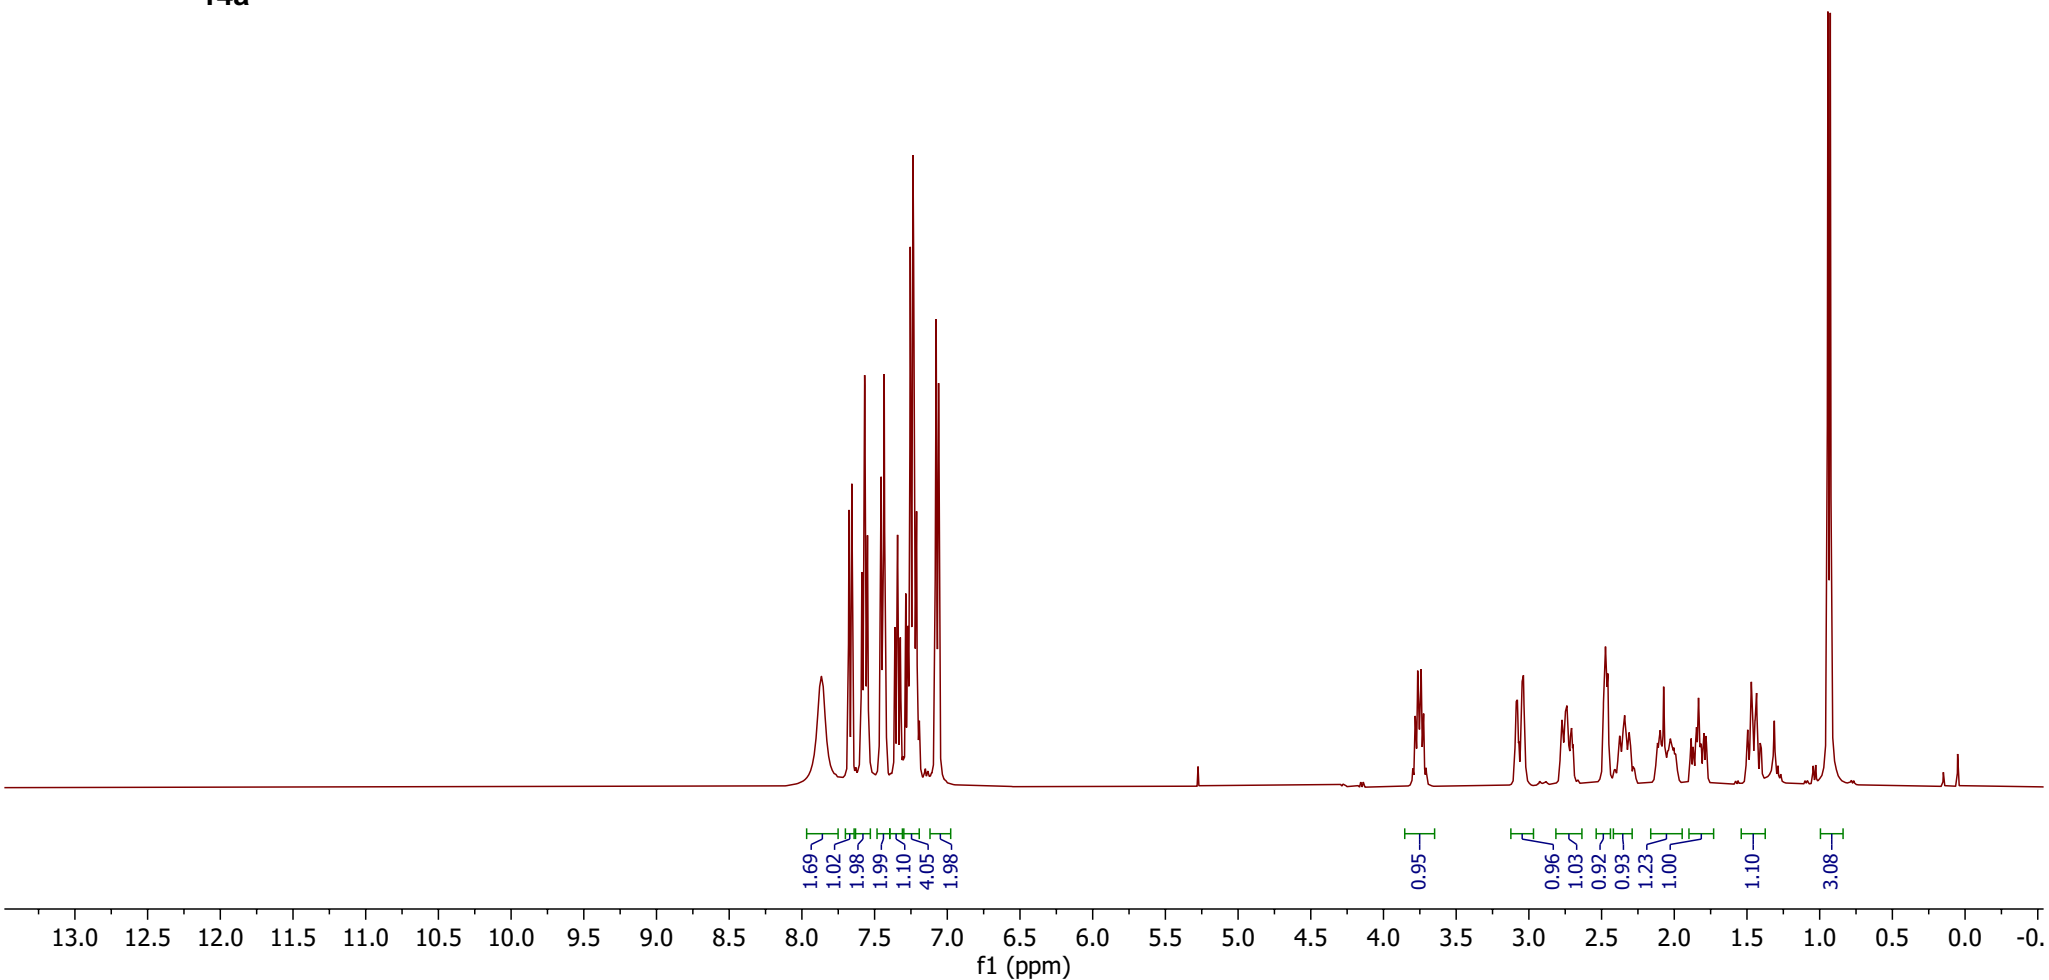

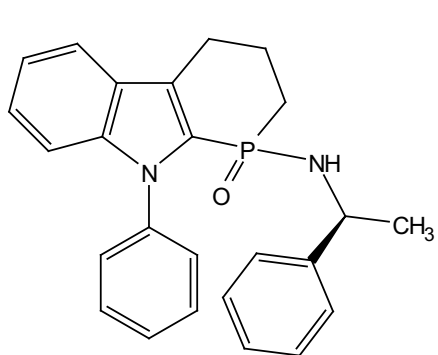

Racemic Mixture **14a**

23.50  
20.43

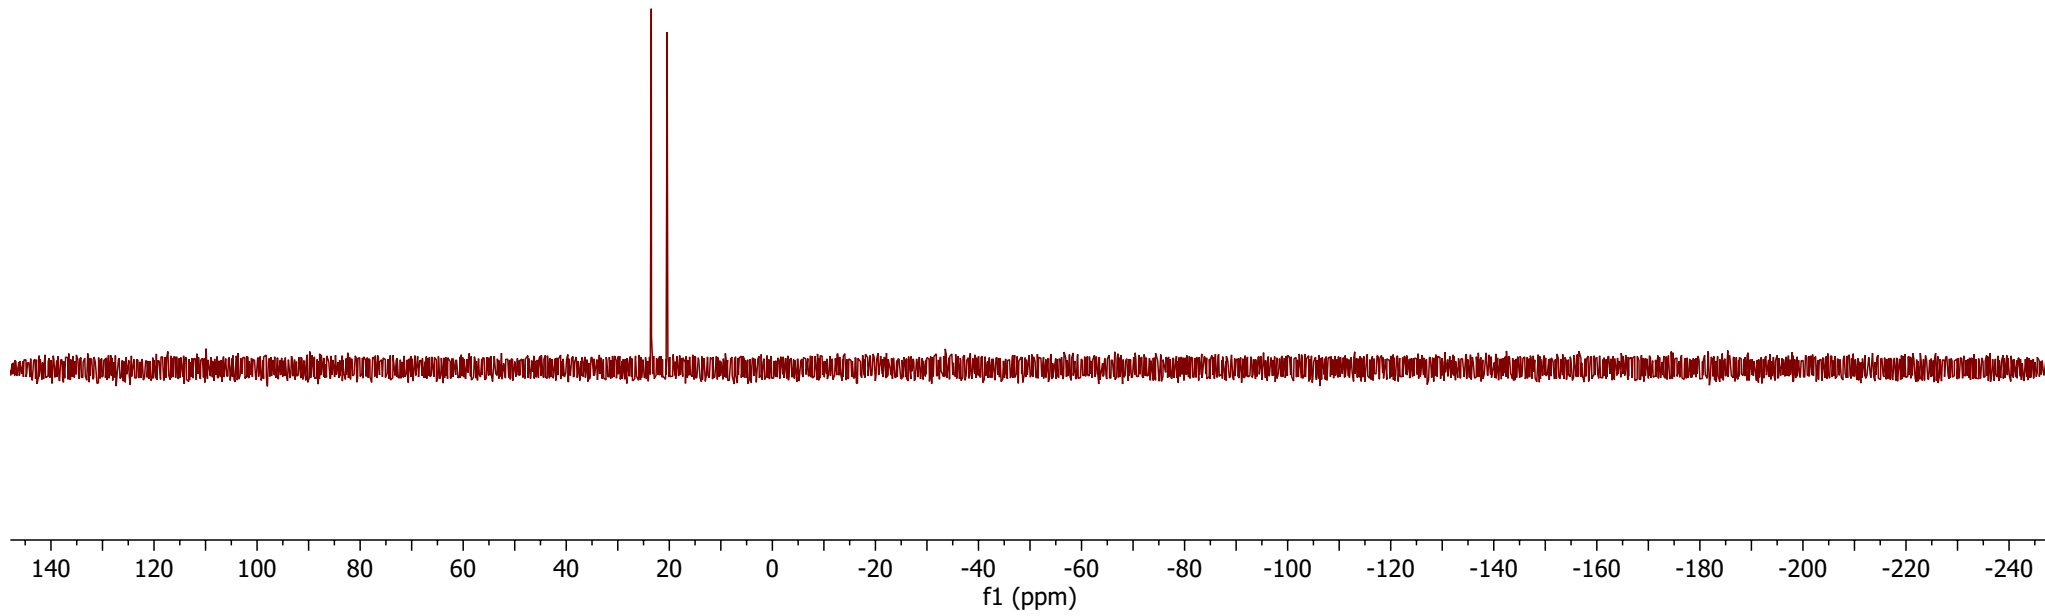



14a

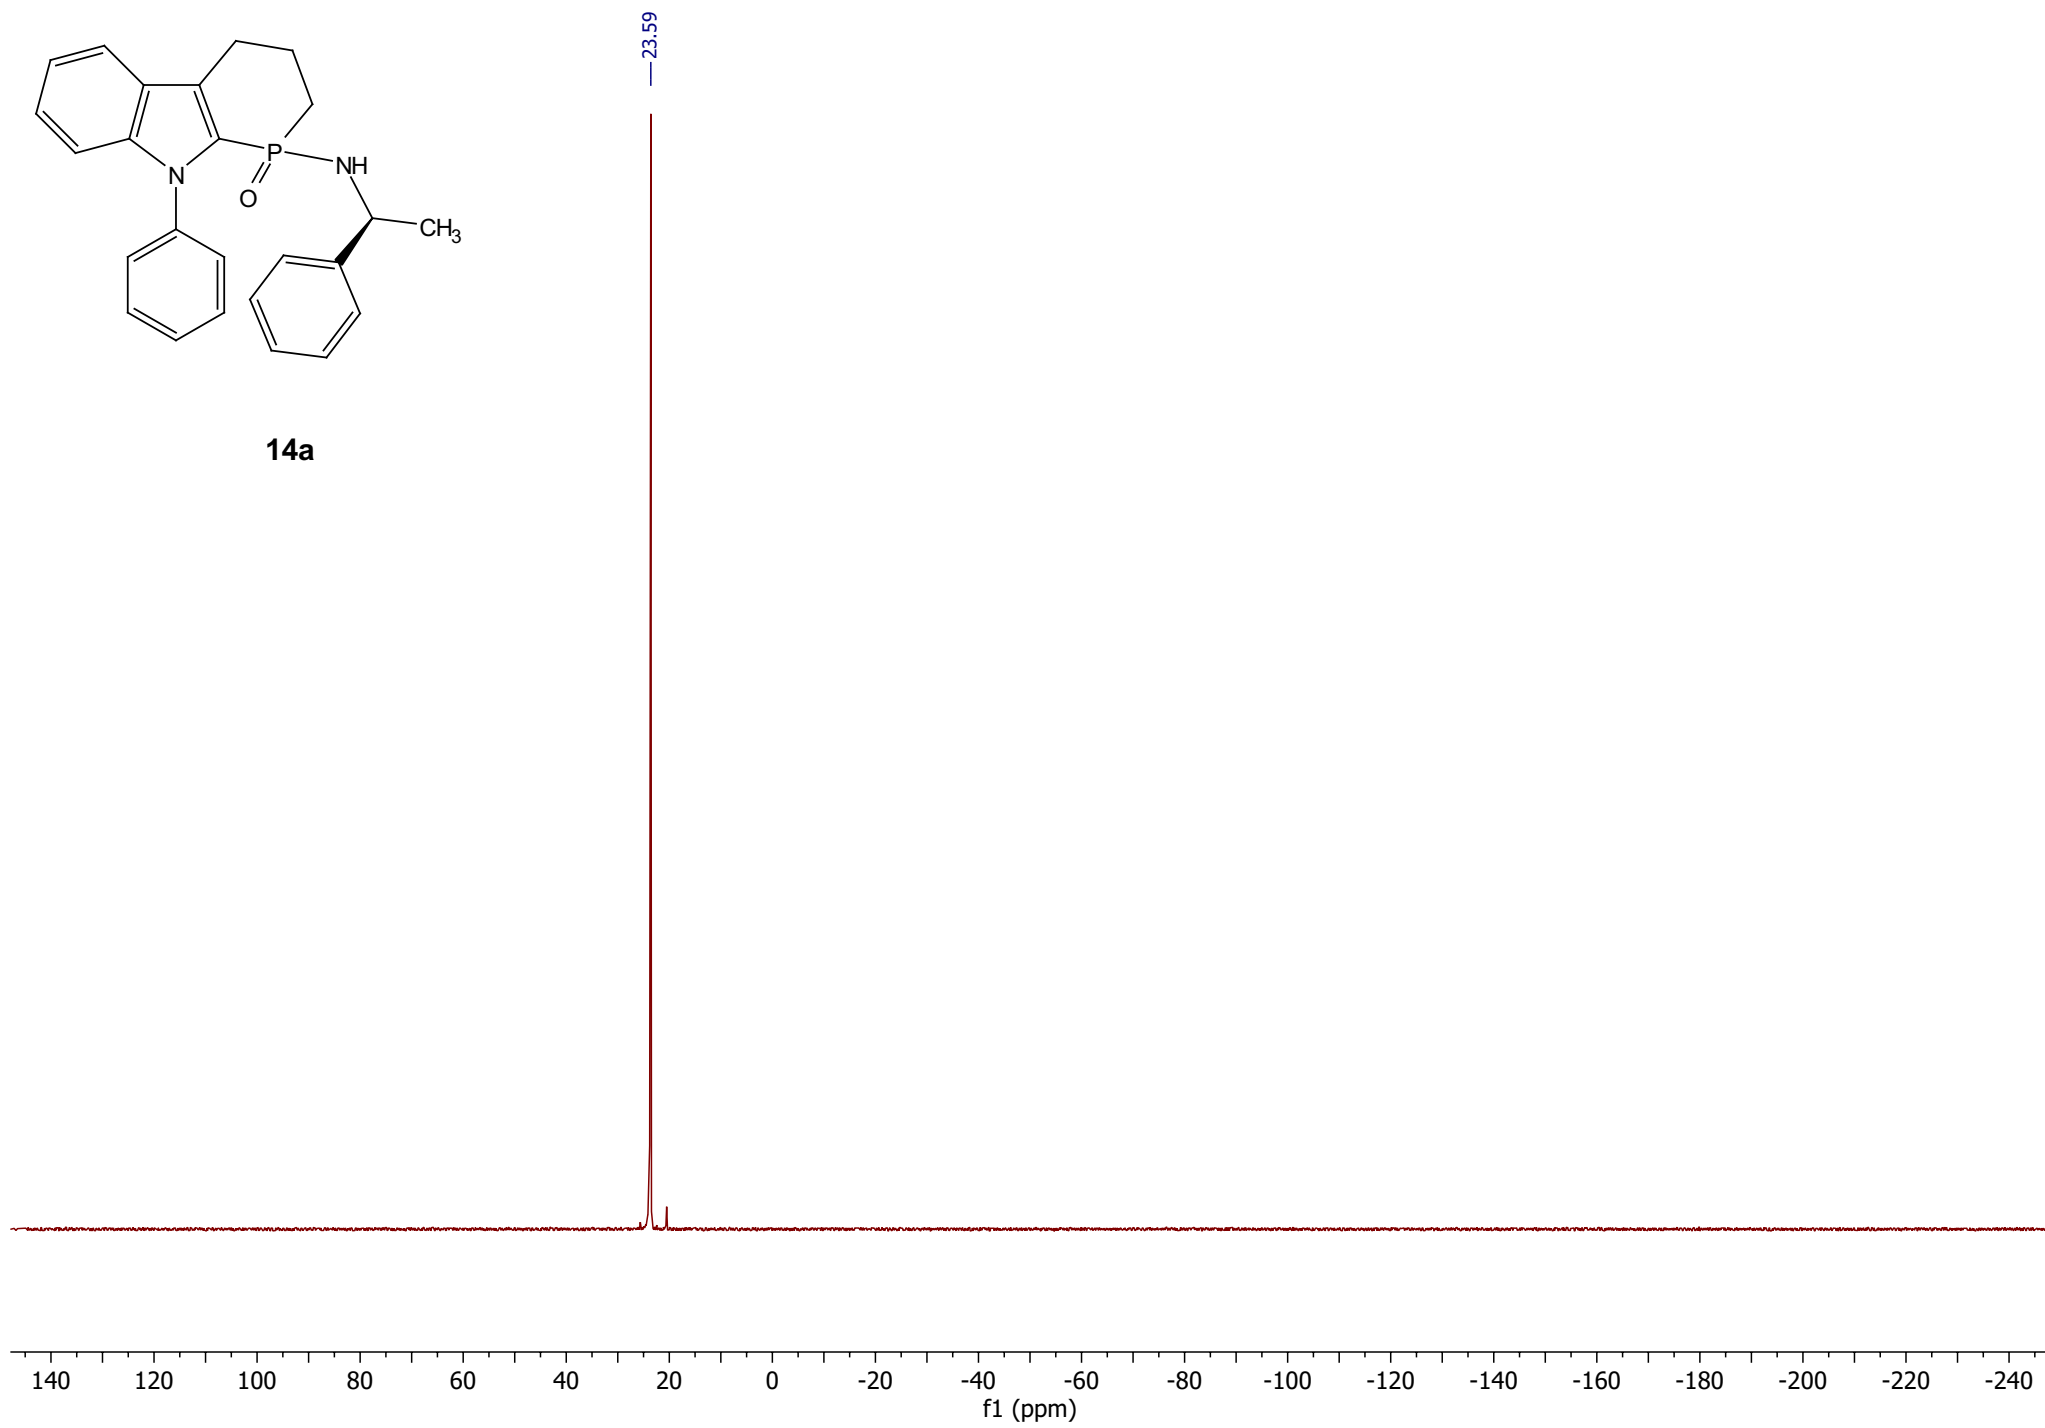

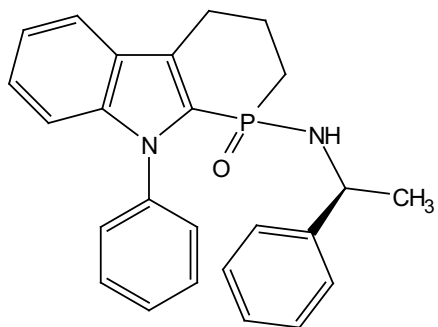

14a

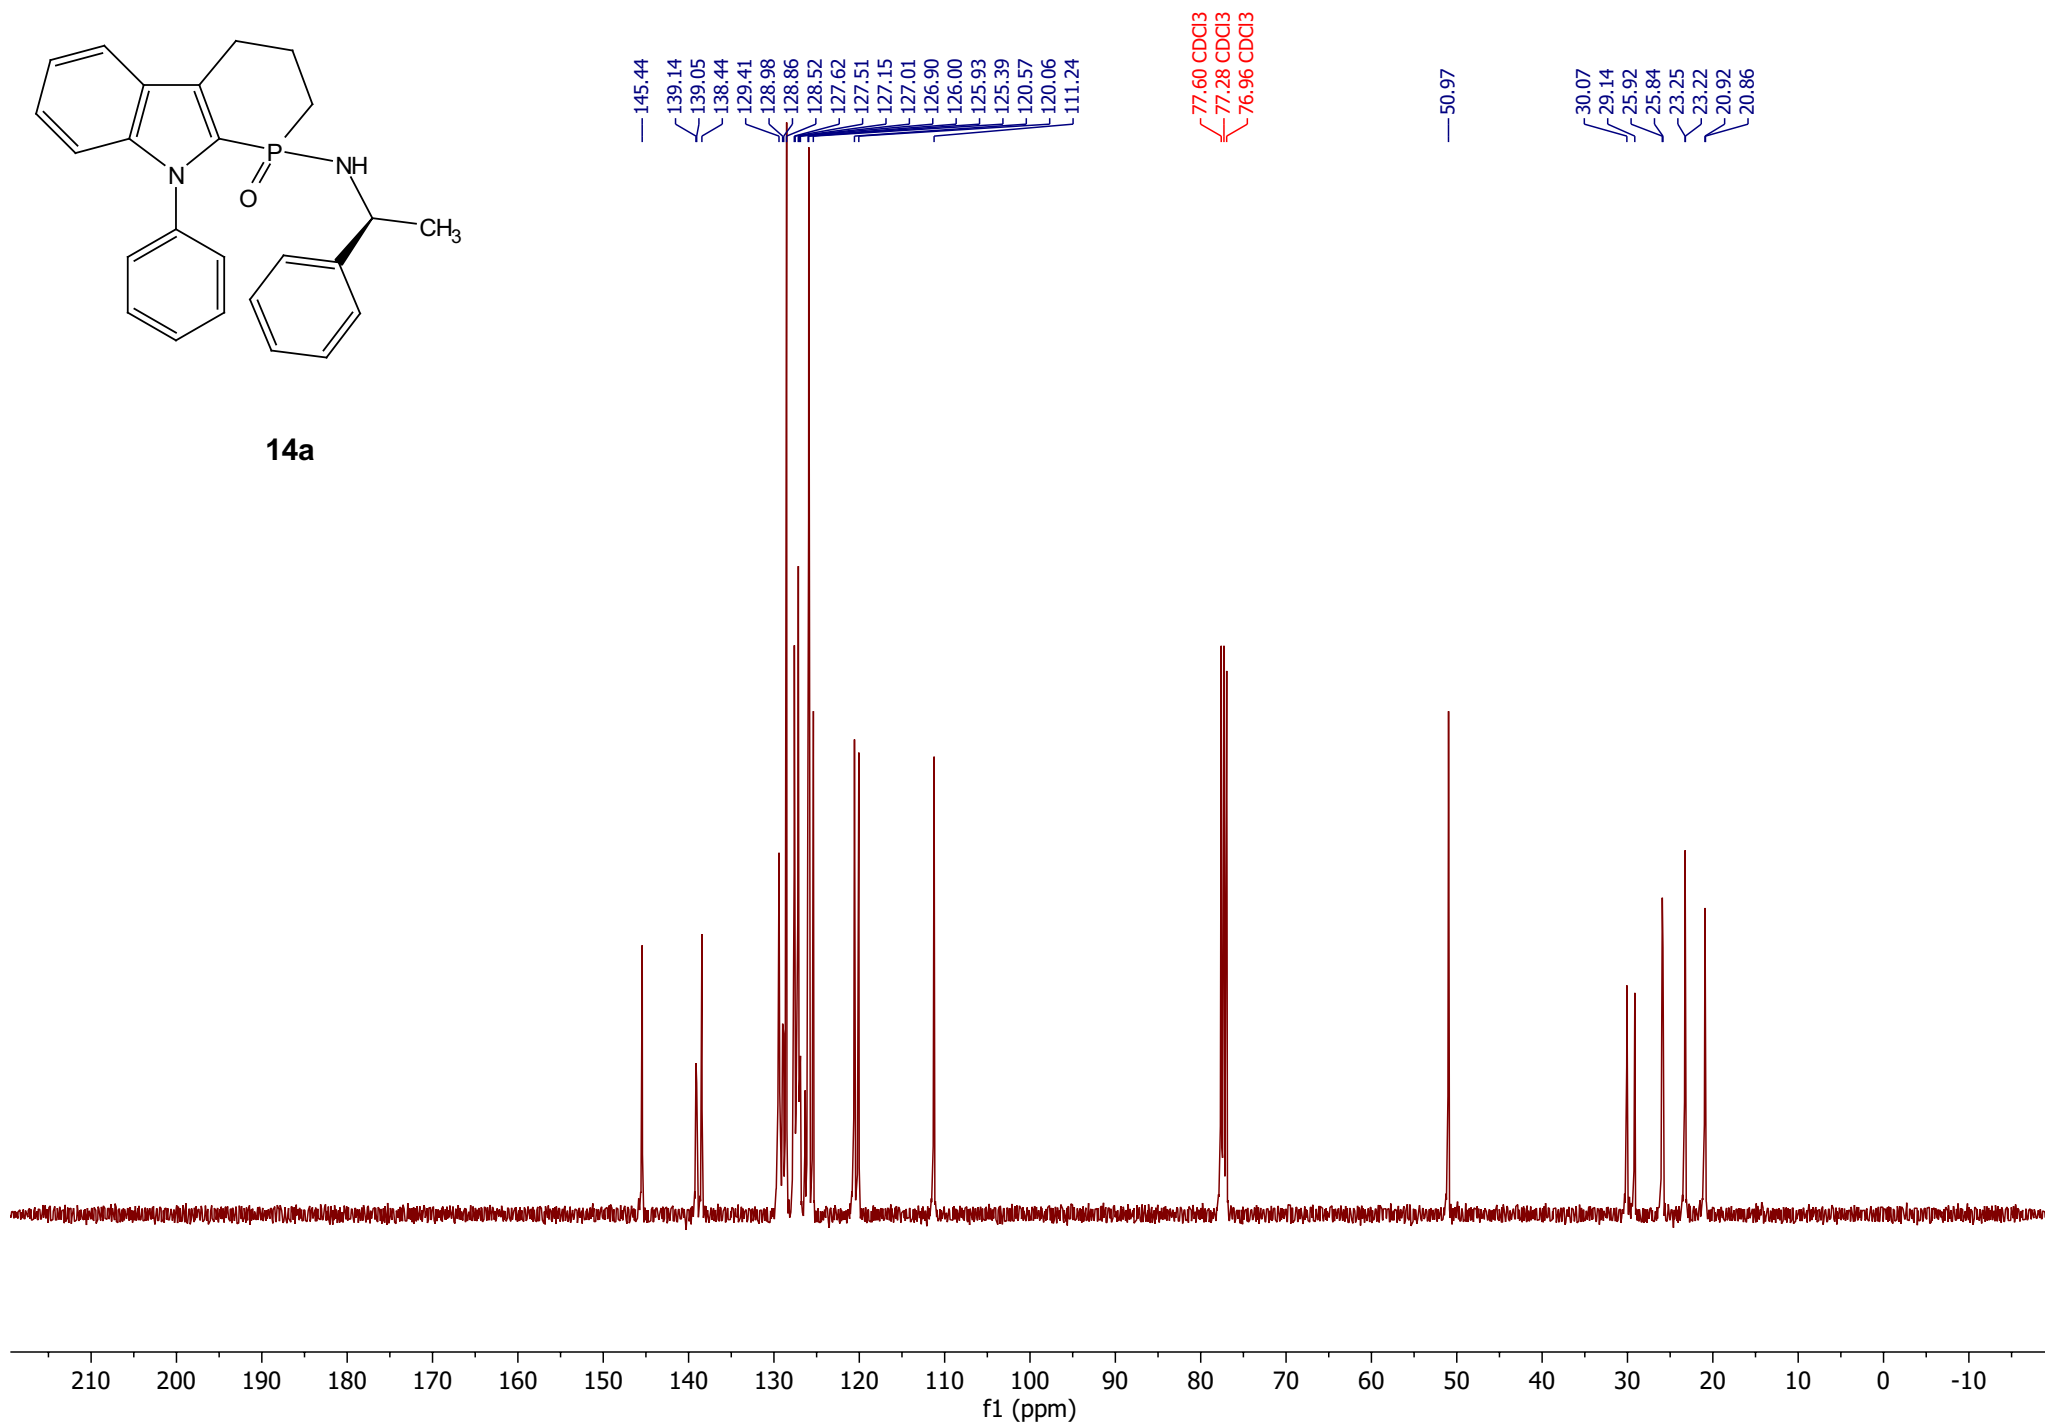

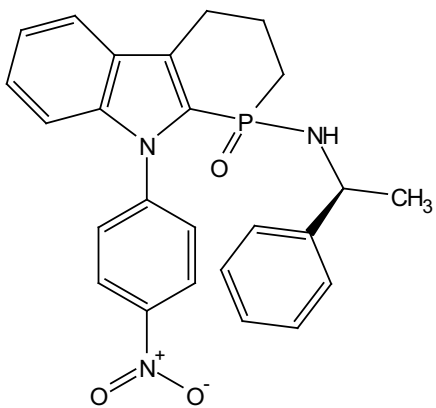

**14b**

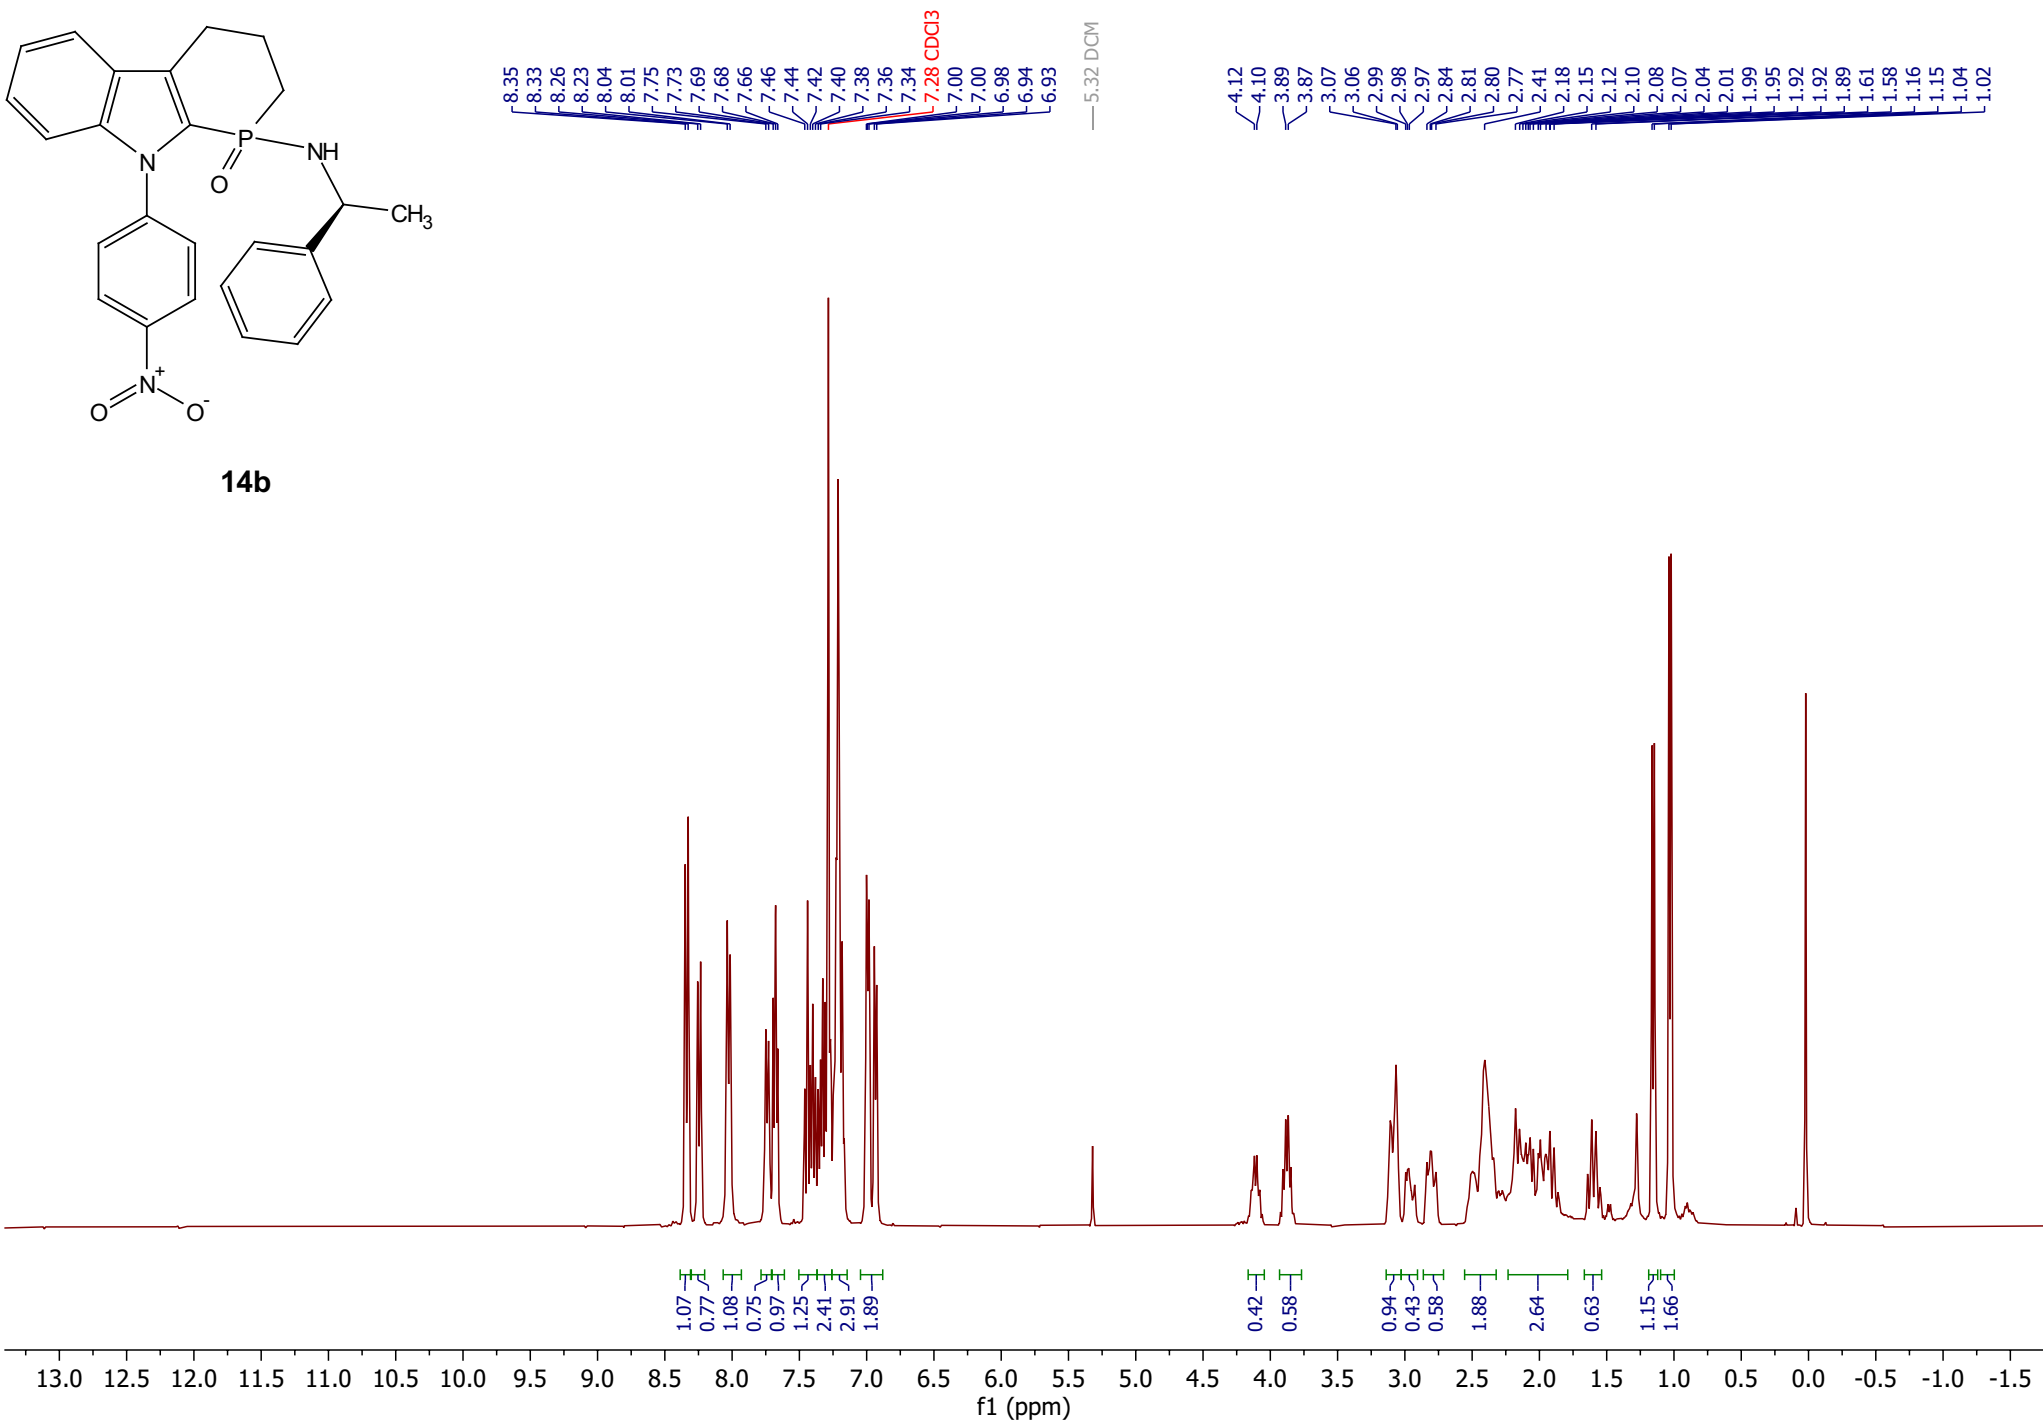

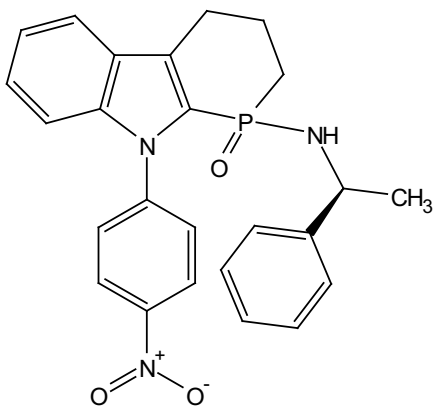

14b

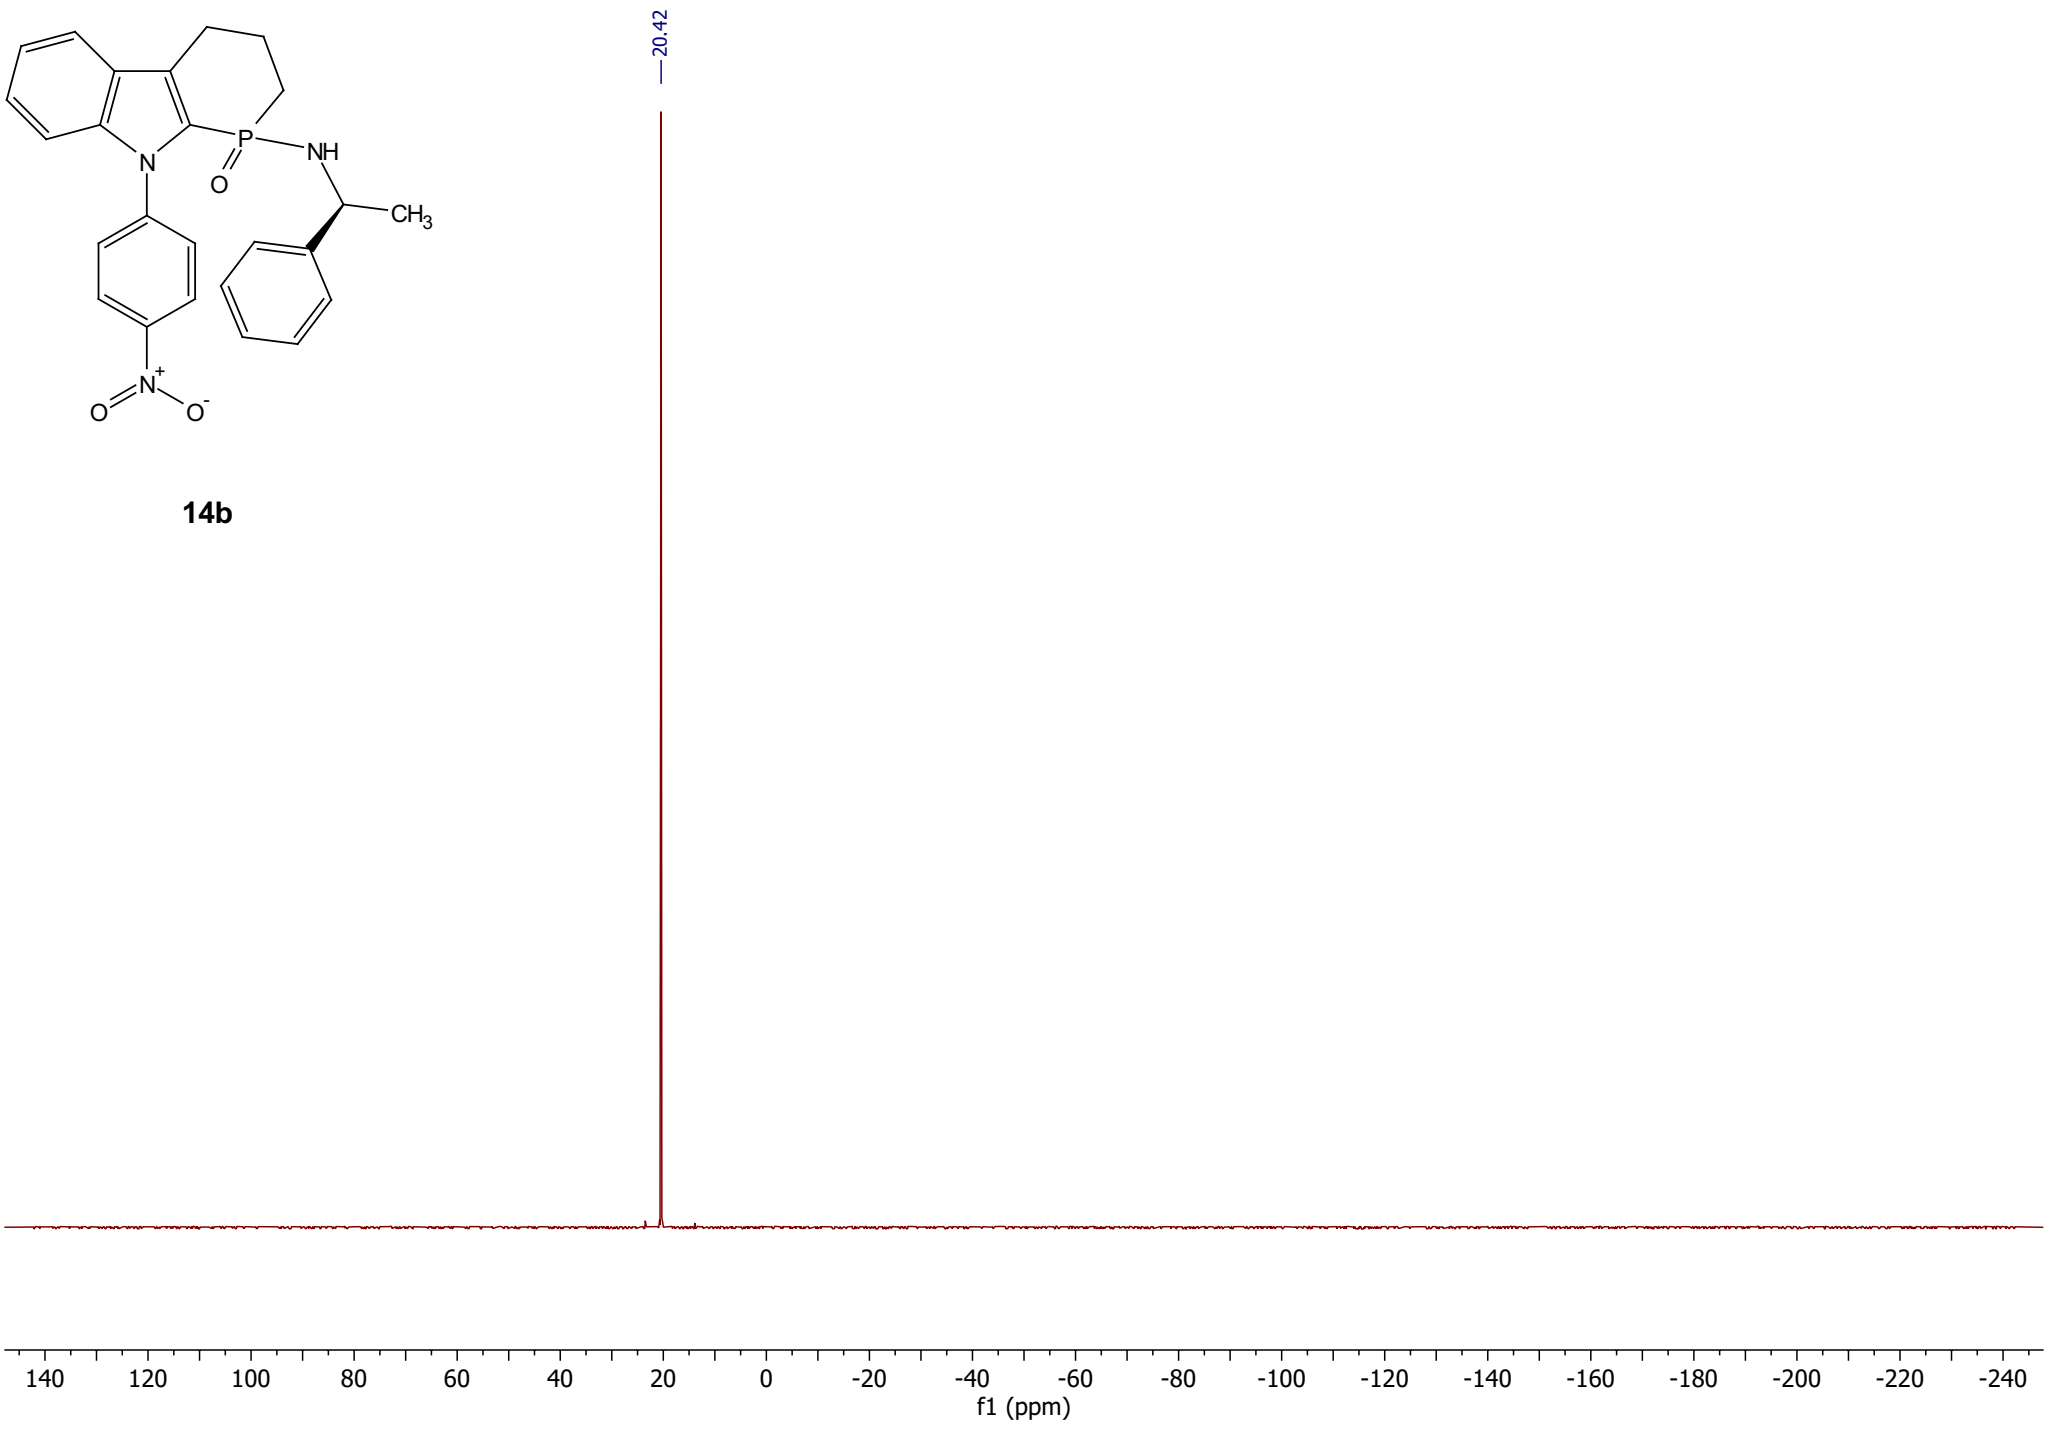

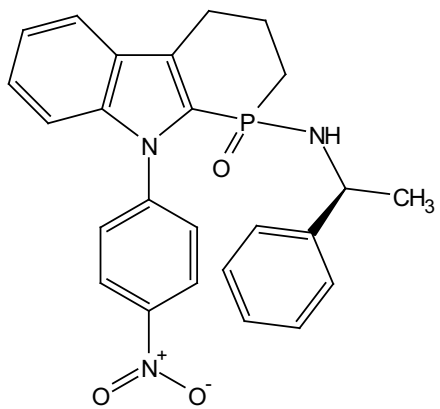

14b

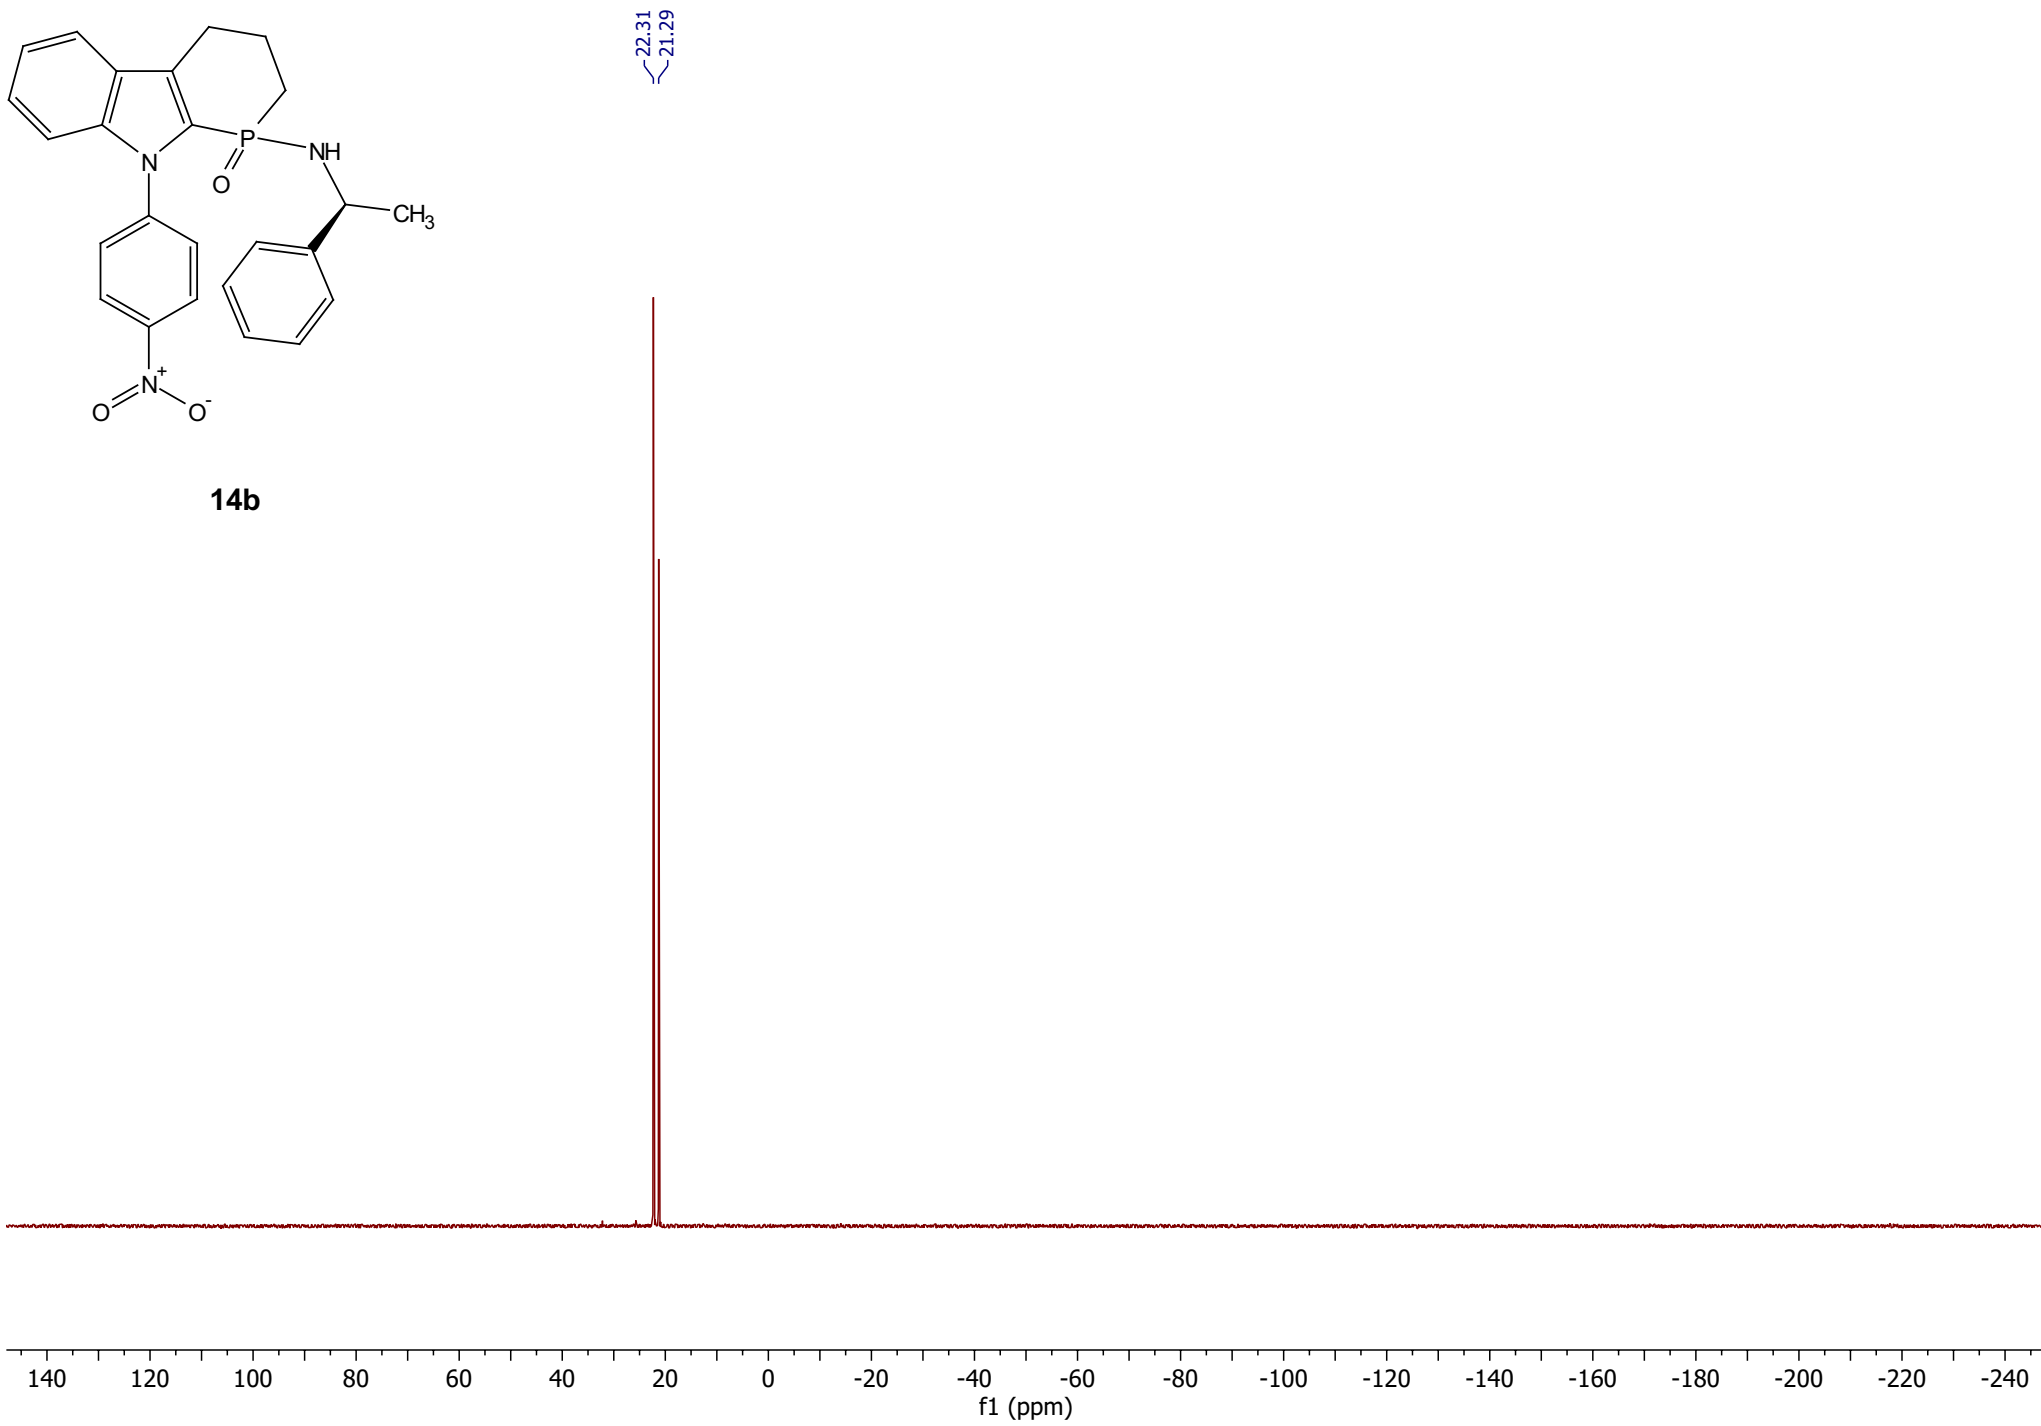



14b

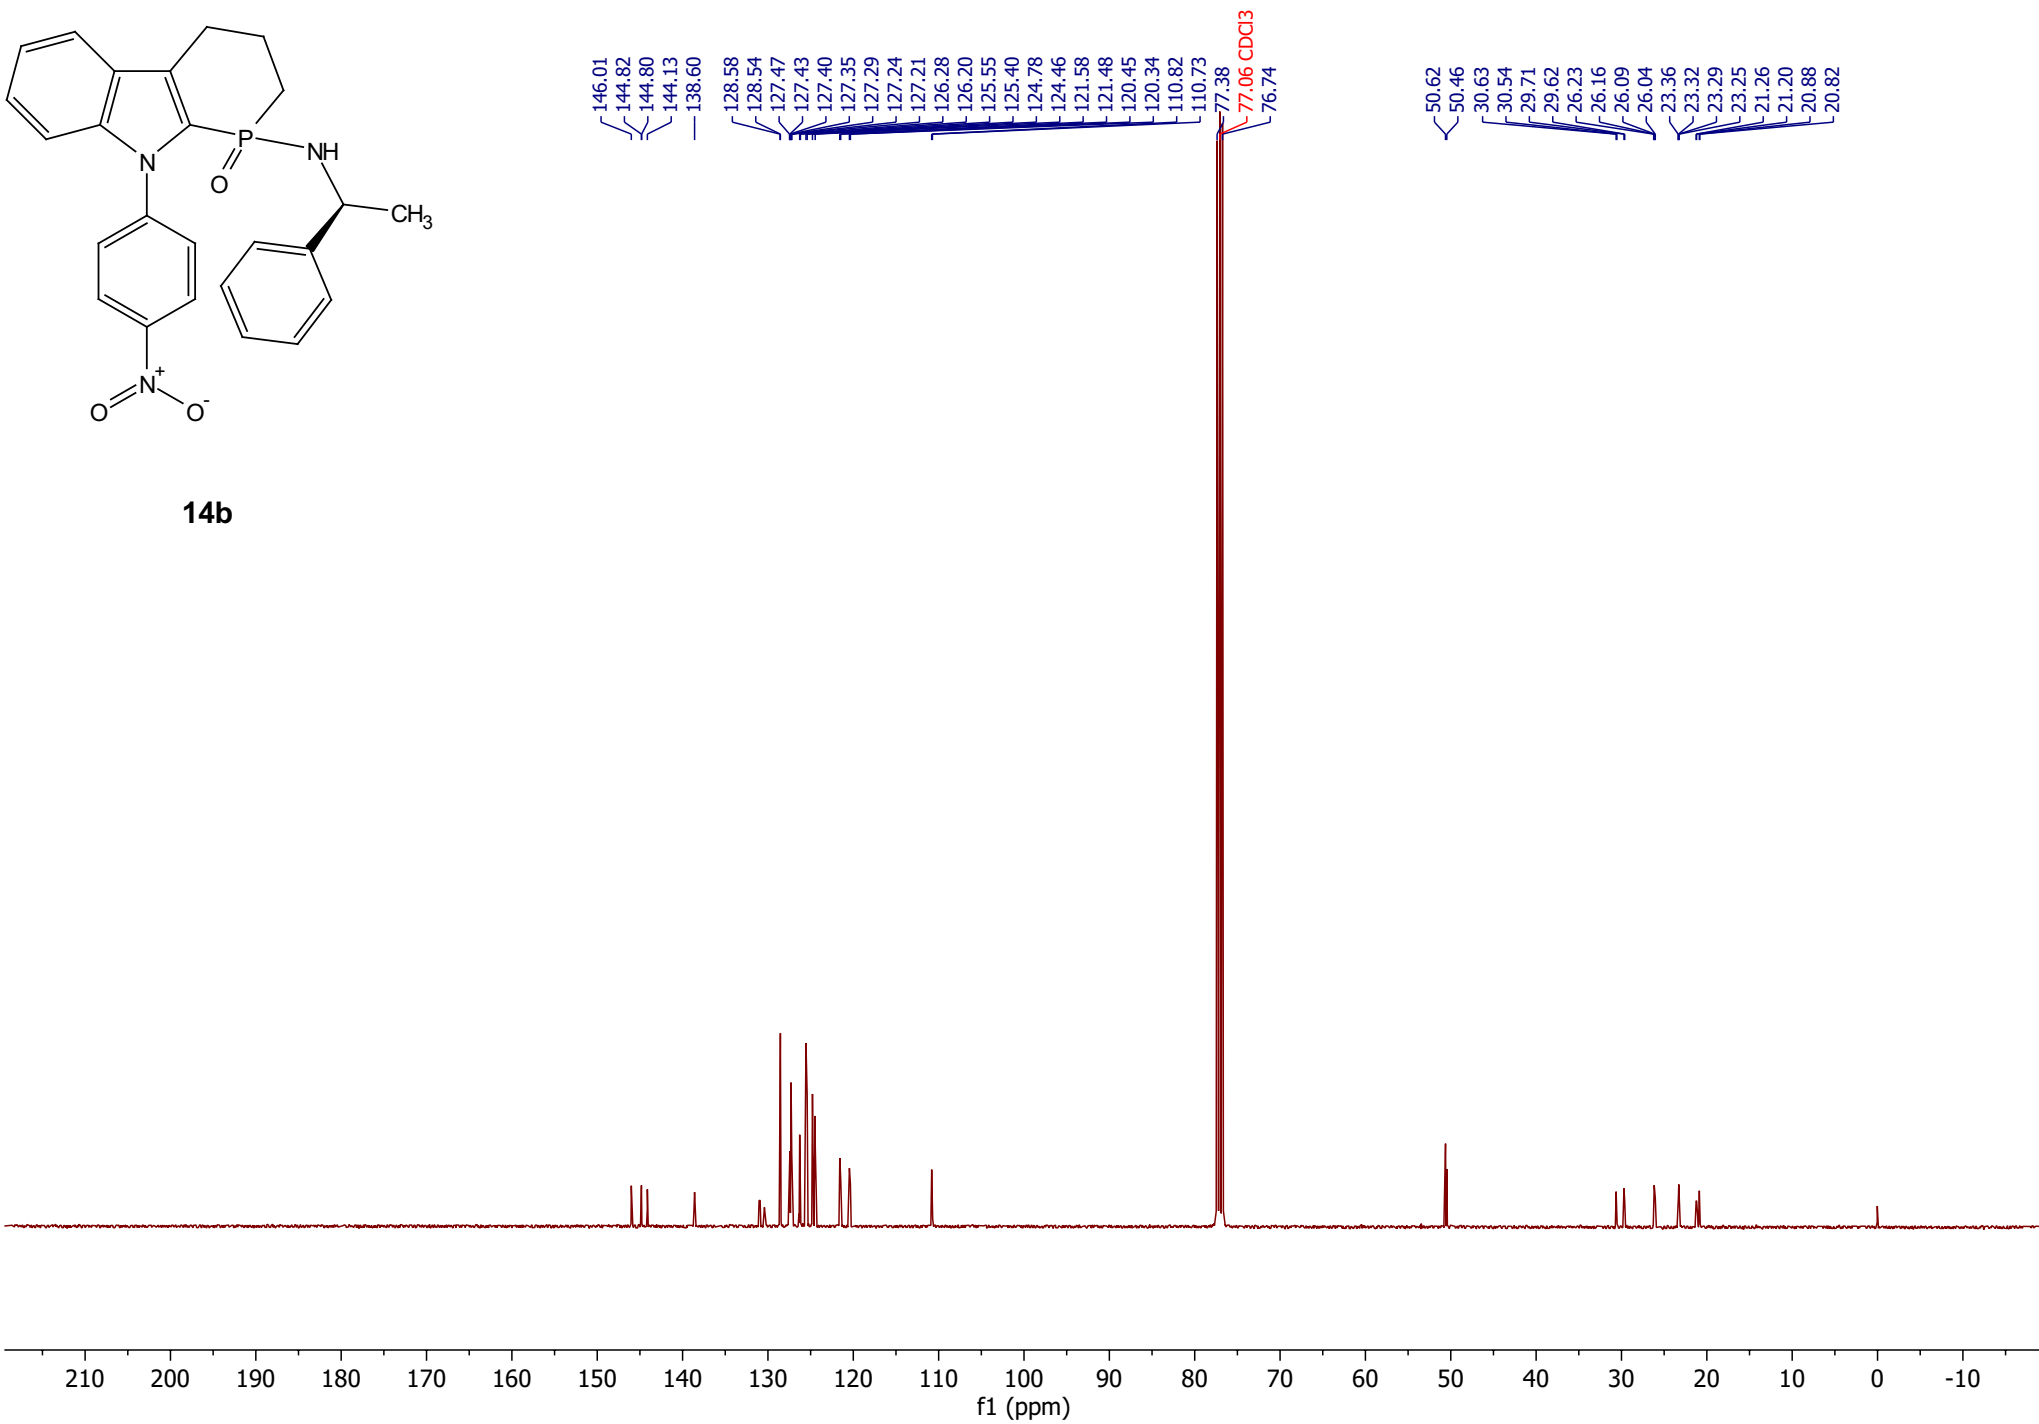



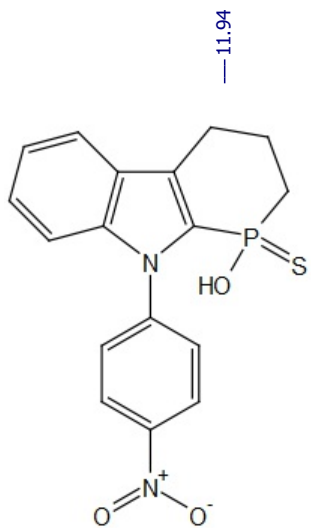

**2**

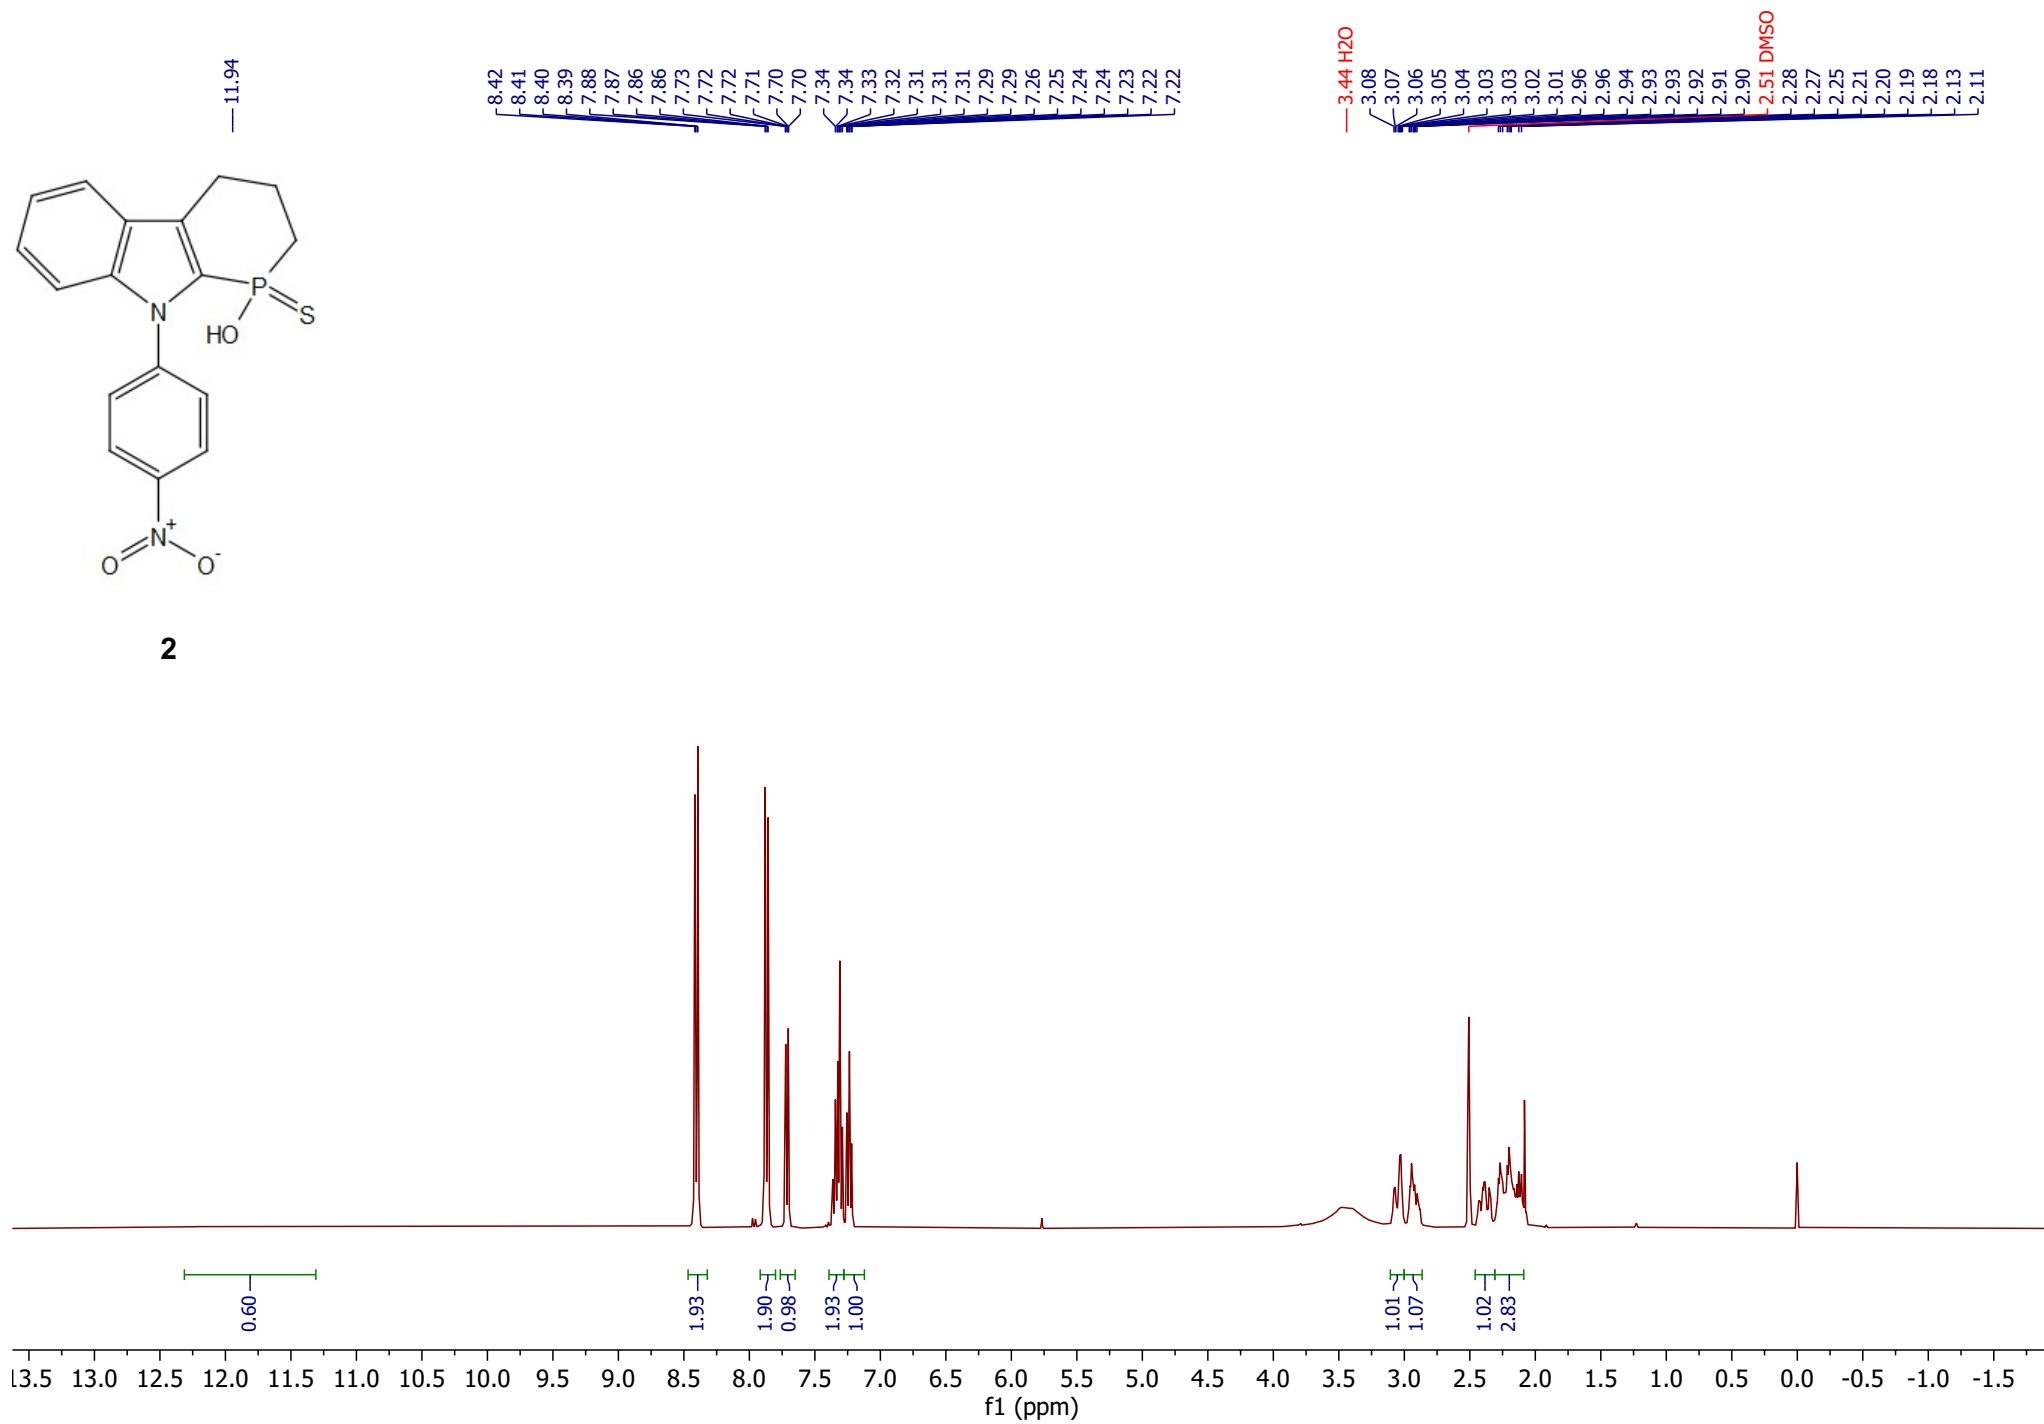

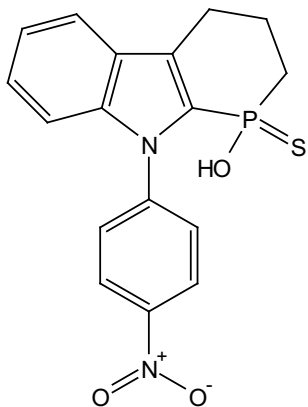

2

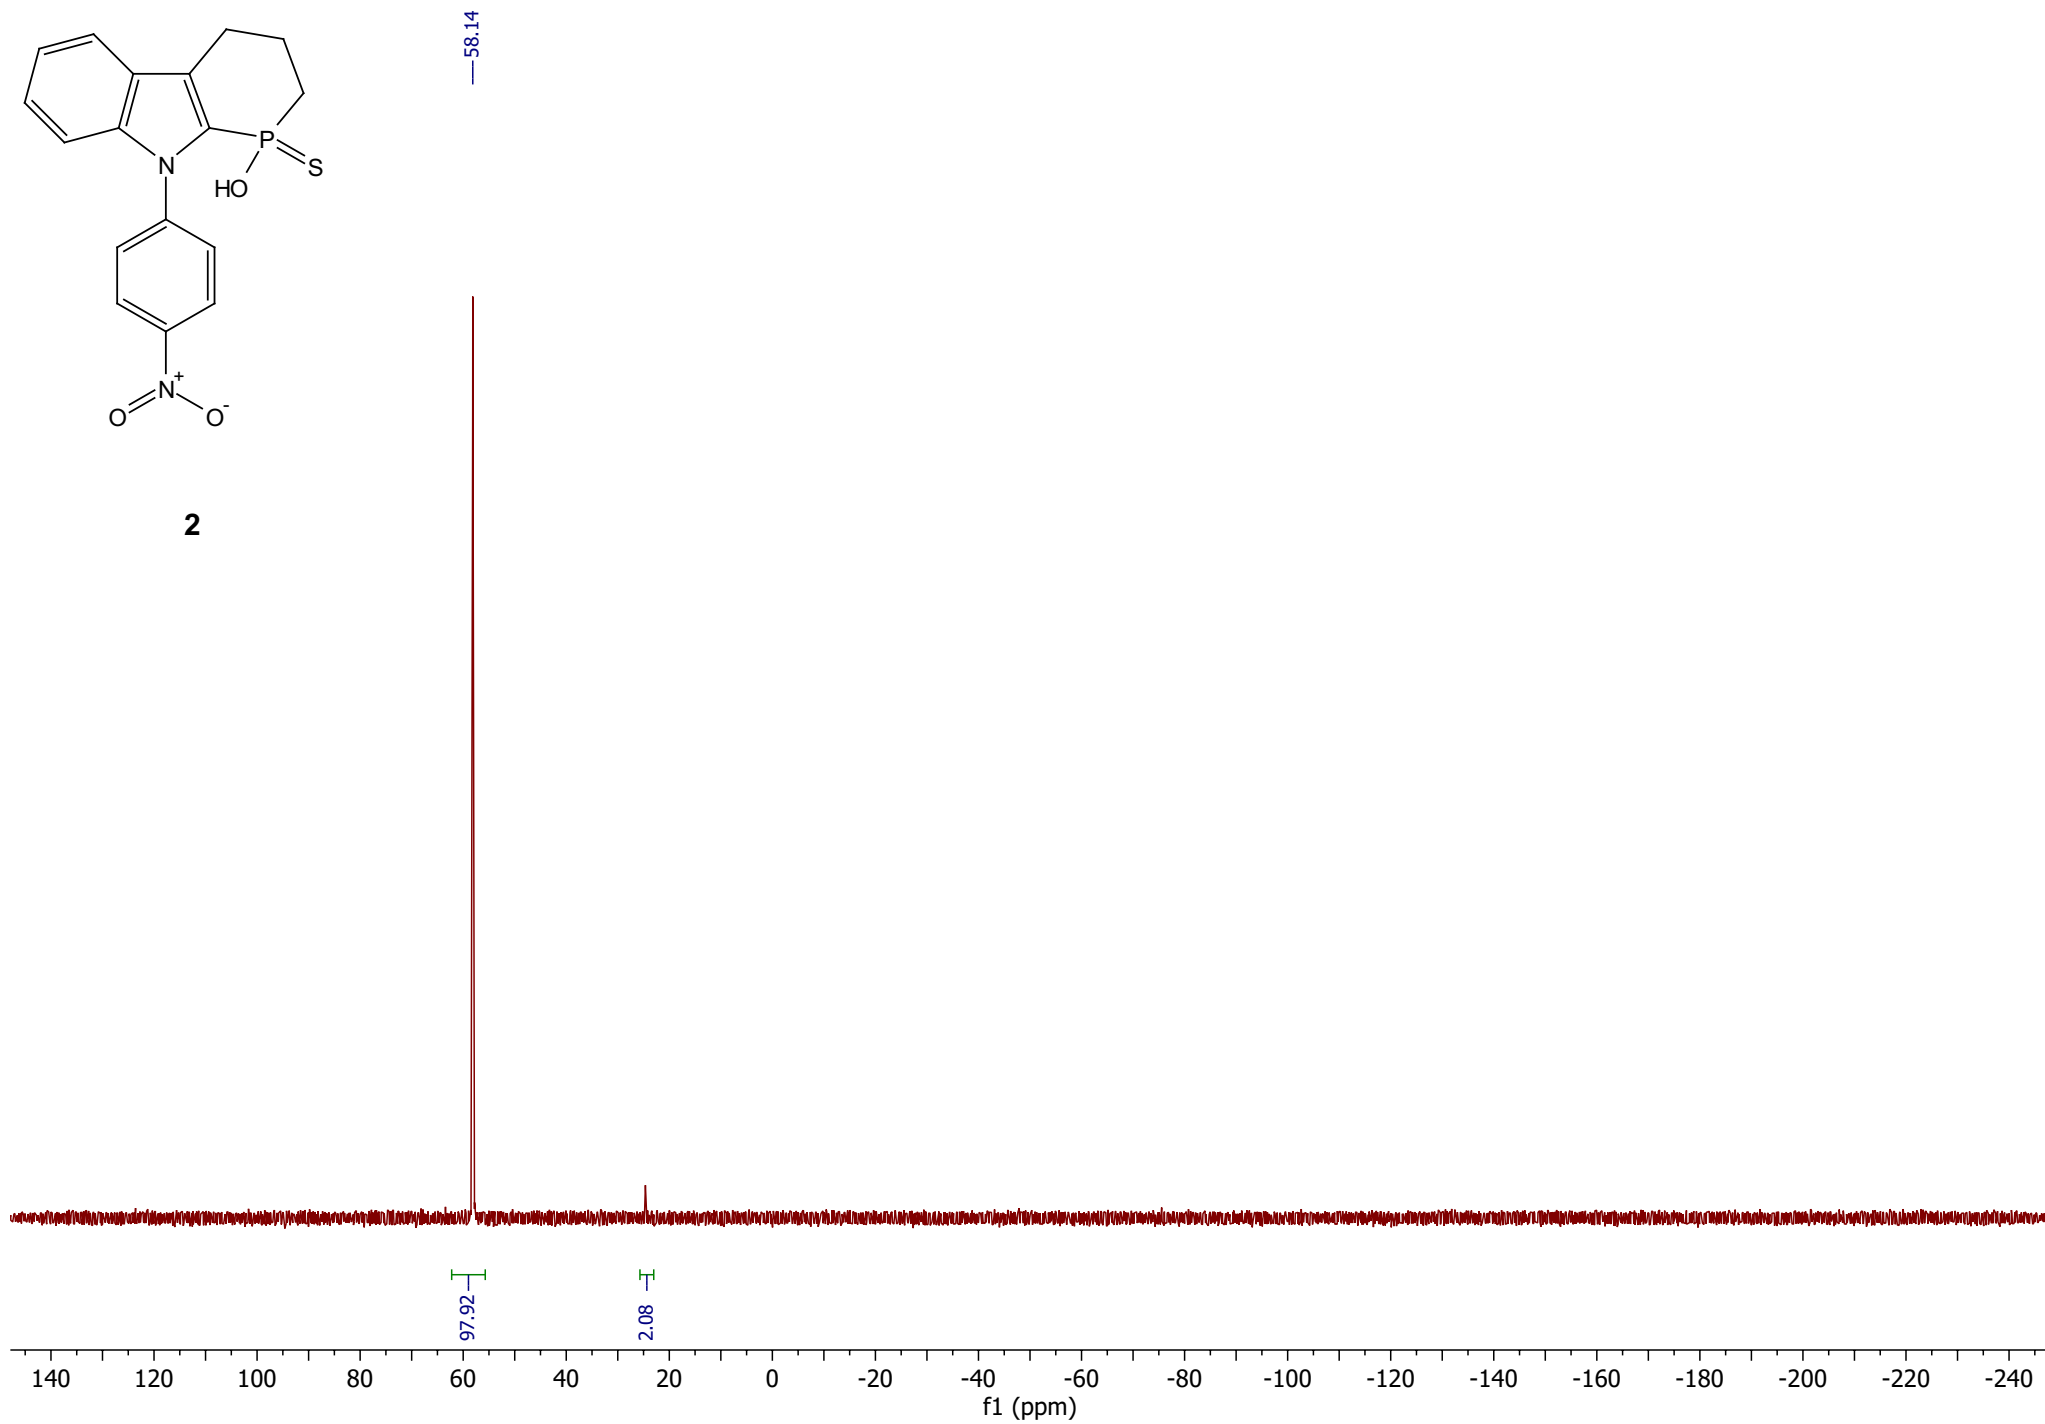

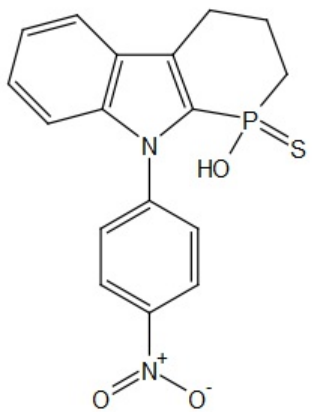

2

146.37  
144.56  
138.68  
138.60  
130.94  
129.86  
128.91  
127.00  
126.89  
126.23  
125.13  
125.01  
124.89  
121.72  
120.97  
110.80

39.96 DMSO  
37.66  
36.88

23.07  
23.04  
20.93  
20.86

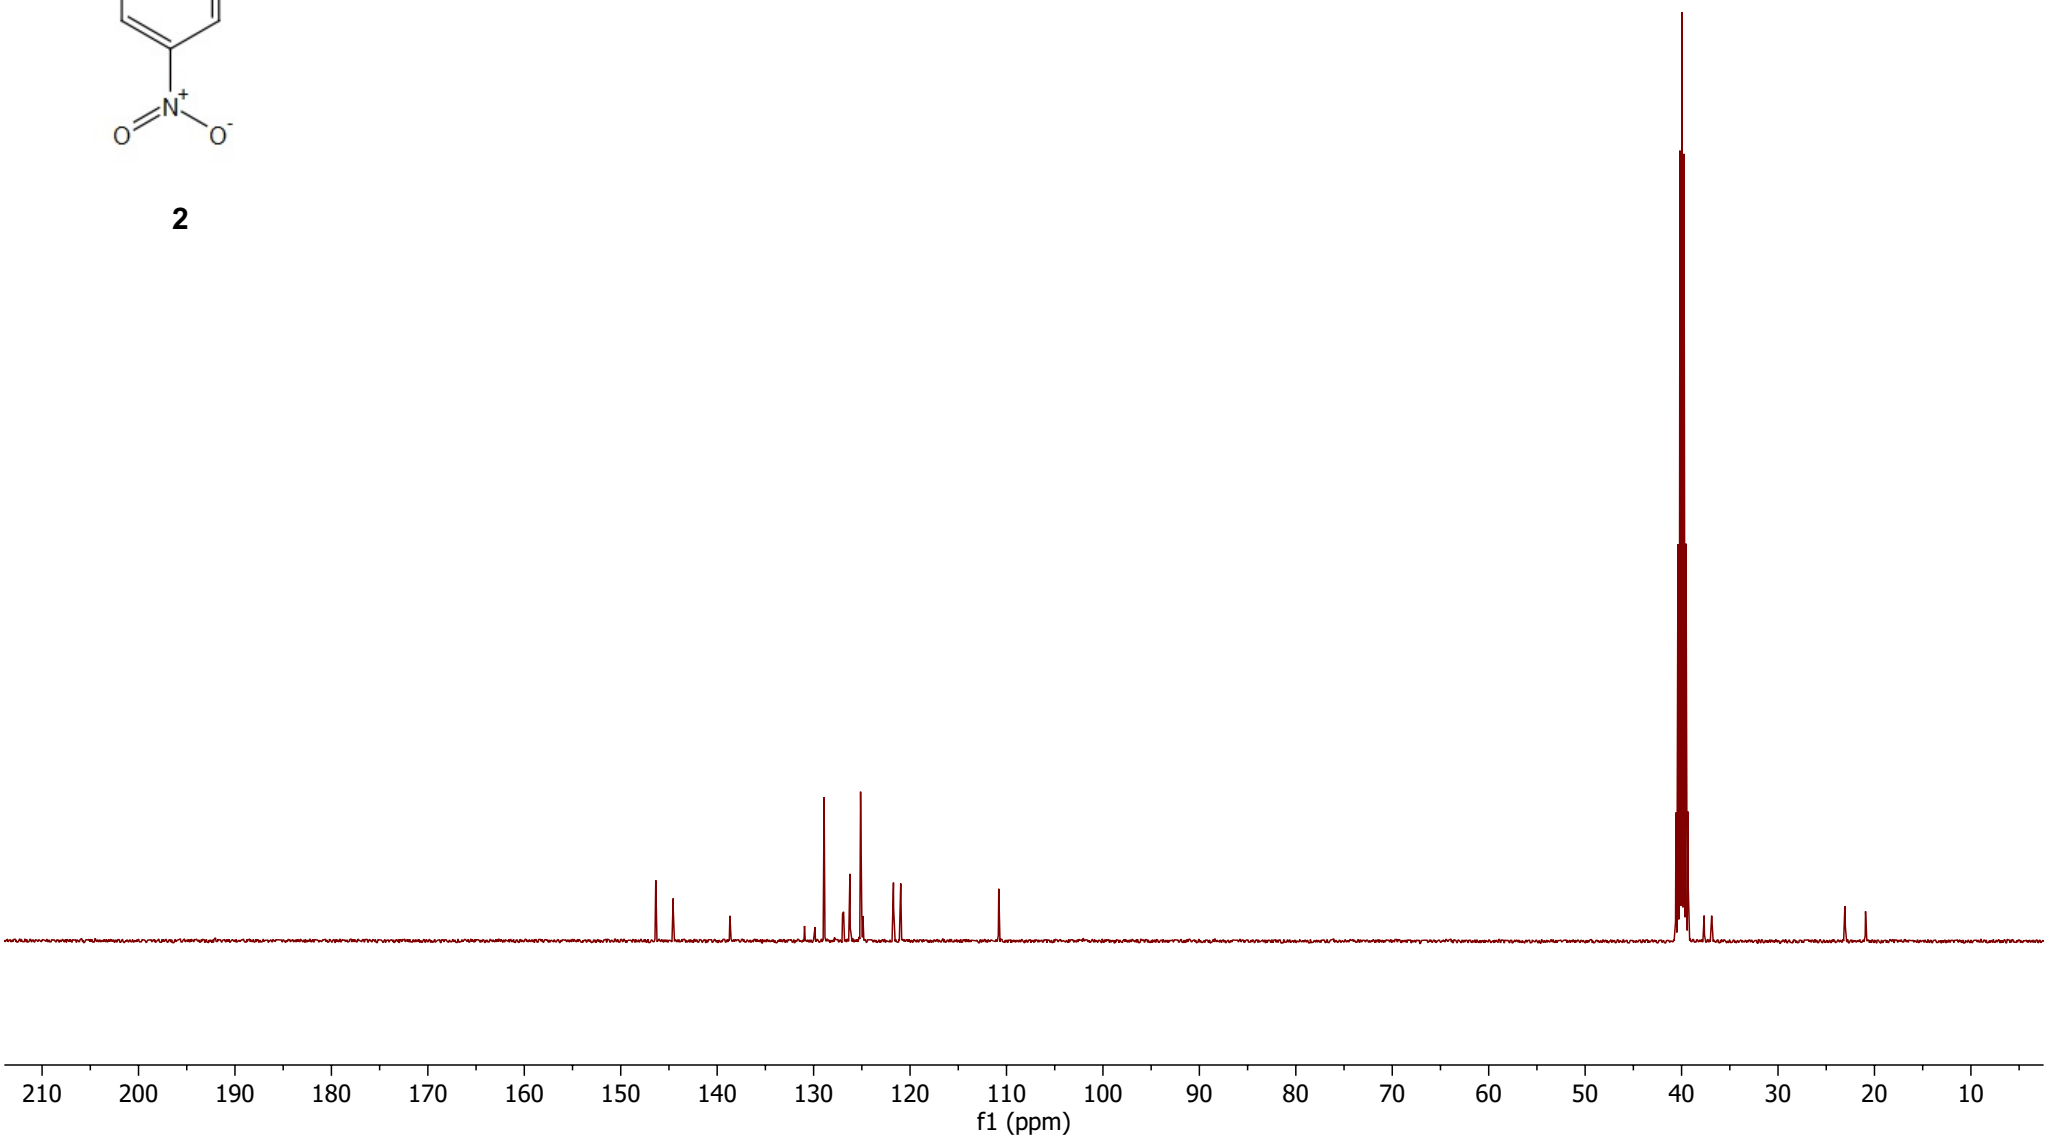

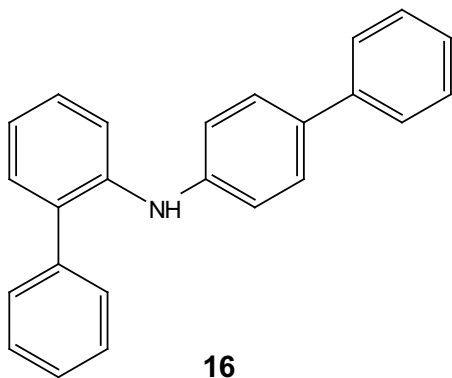

16

7.62  
7.62  
7.61  
7.60  
7.60  
7.56  
7.55  
7.54  
7.54  
7.52  
7.51  
7.51  
7.50  
7.49  
7.49  
7.48  
7.46  
7.46  
7.44  
7.44  
7.37  
7.36  
7.36  
7.36  
7.35  
7.34  
7.34  
7.29 CDCl3  
7.17  
7.17  
7.16  
7.15  
7.14  
7.10  
7.10  
7.08  
7.08  
7.06  
7.06  
5.72

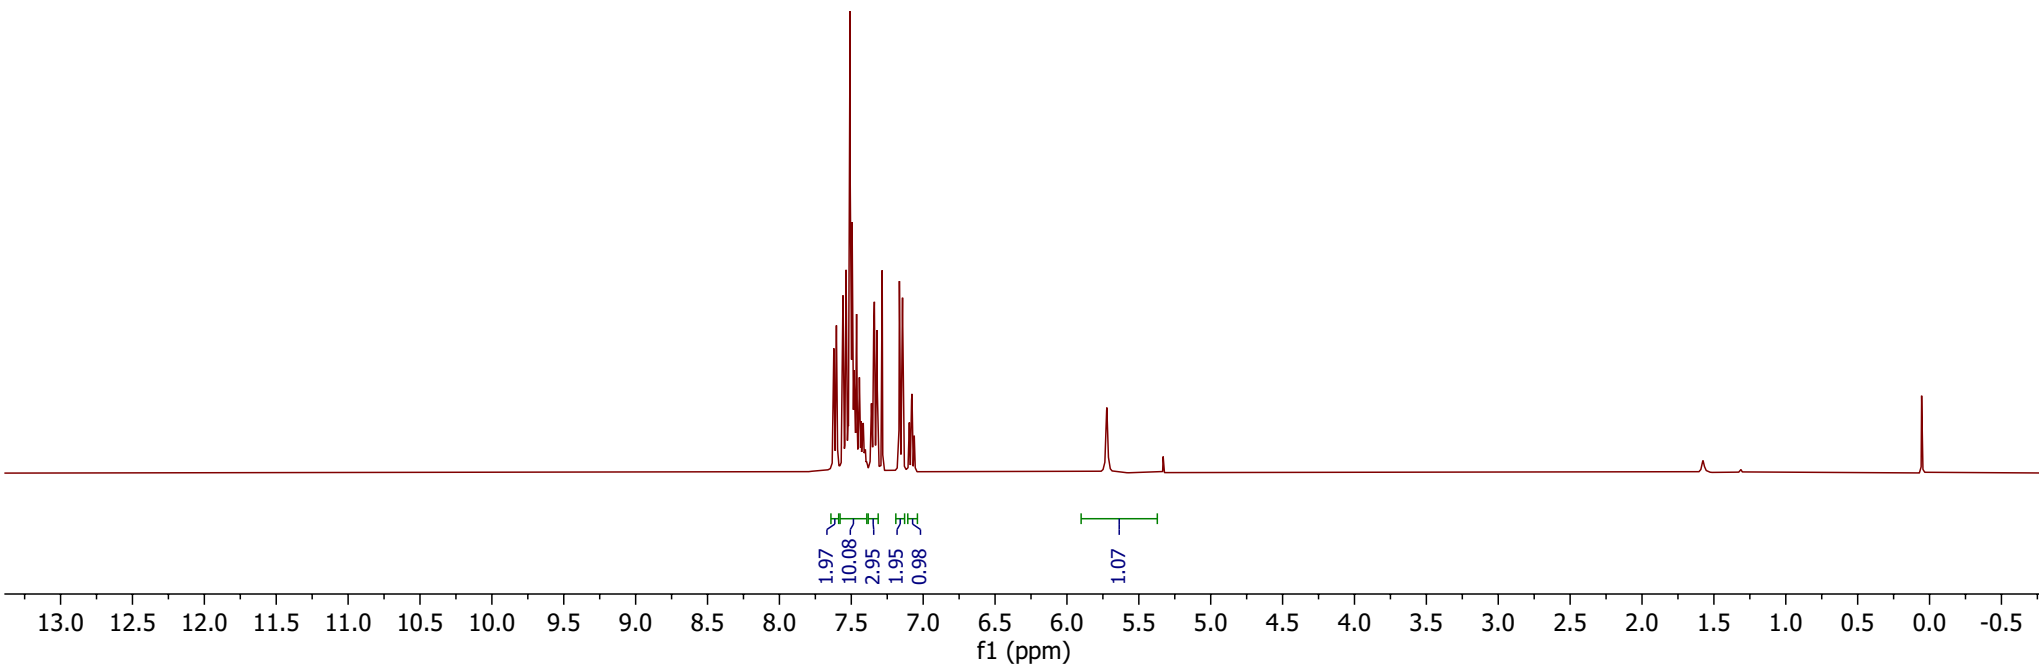

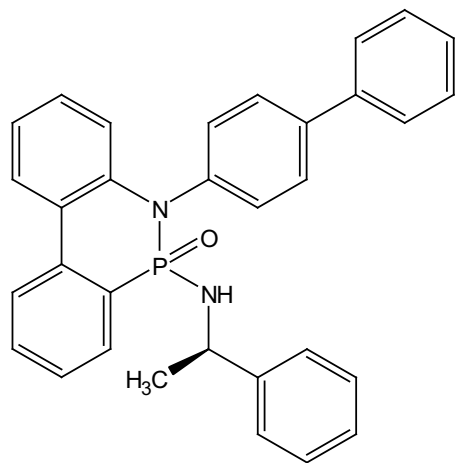

17

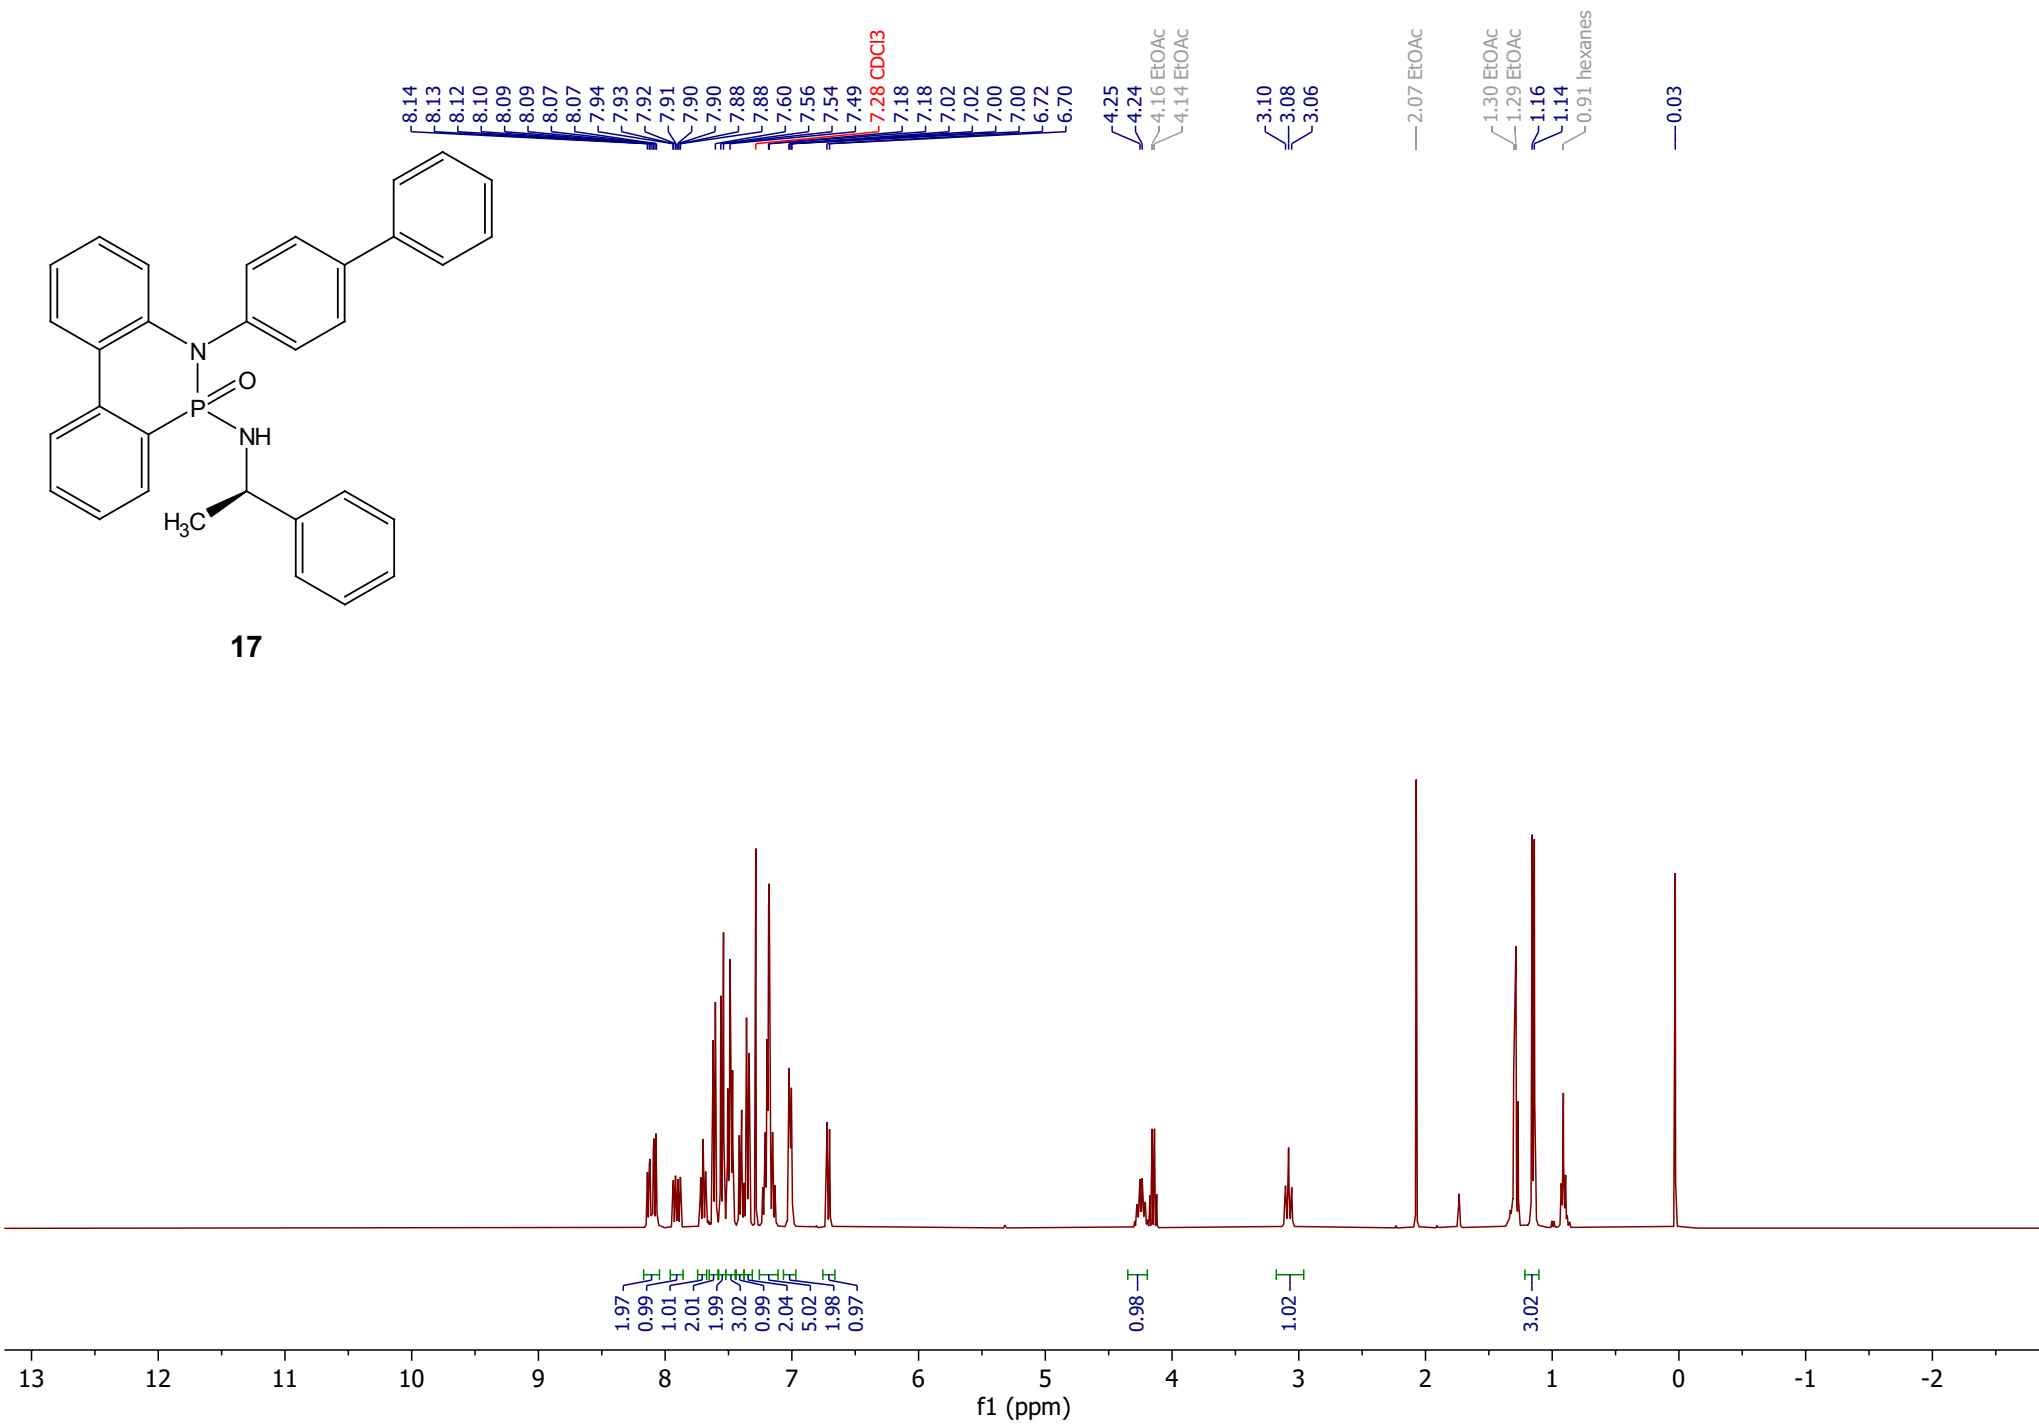

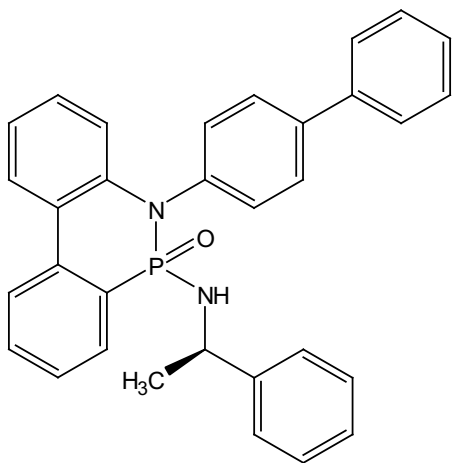

17

—9.23

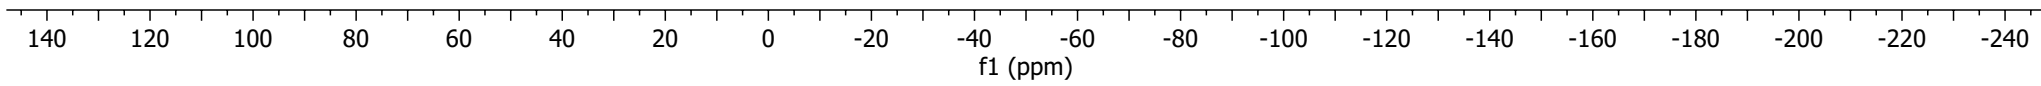

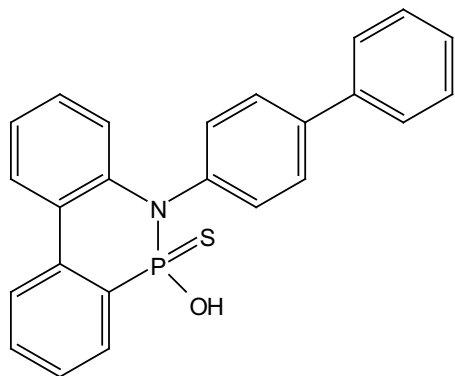

**4**

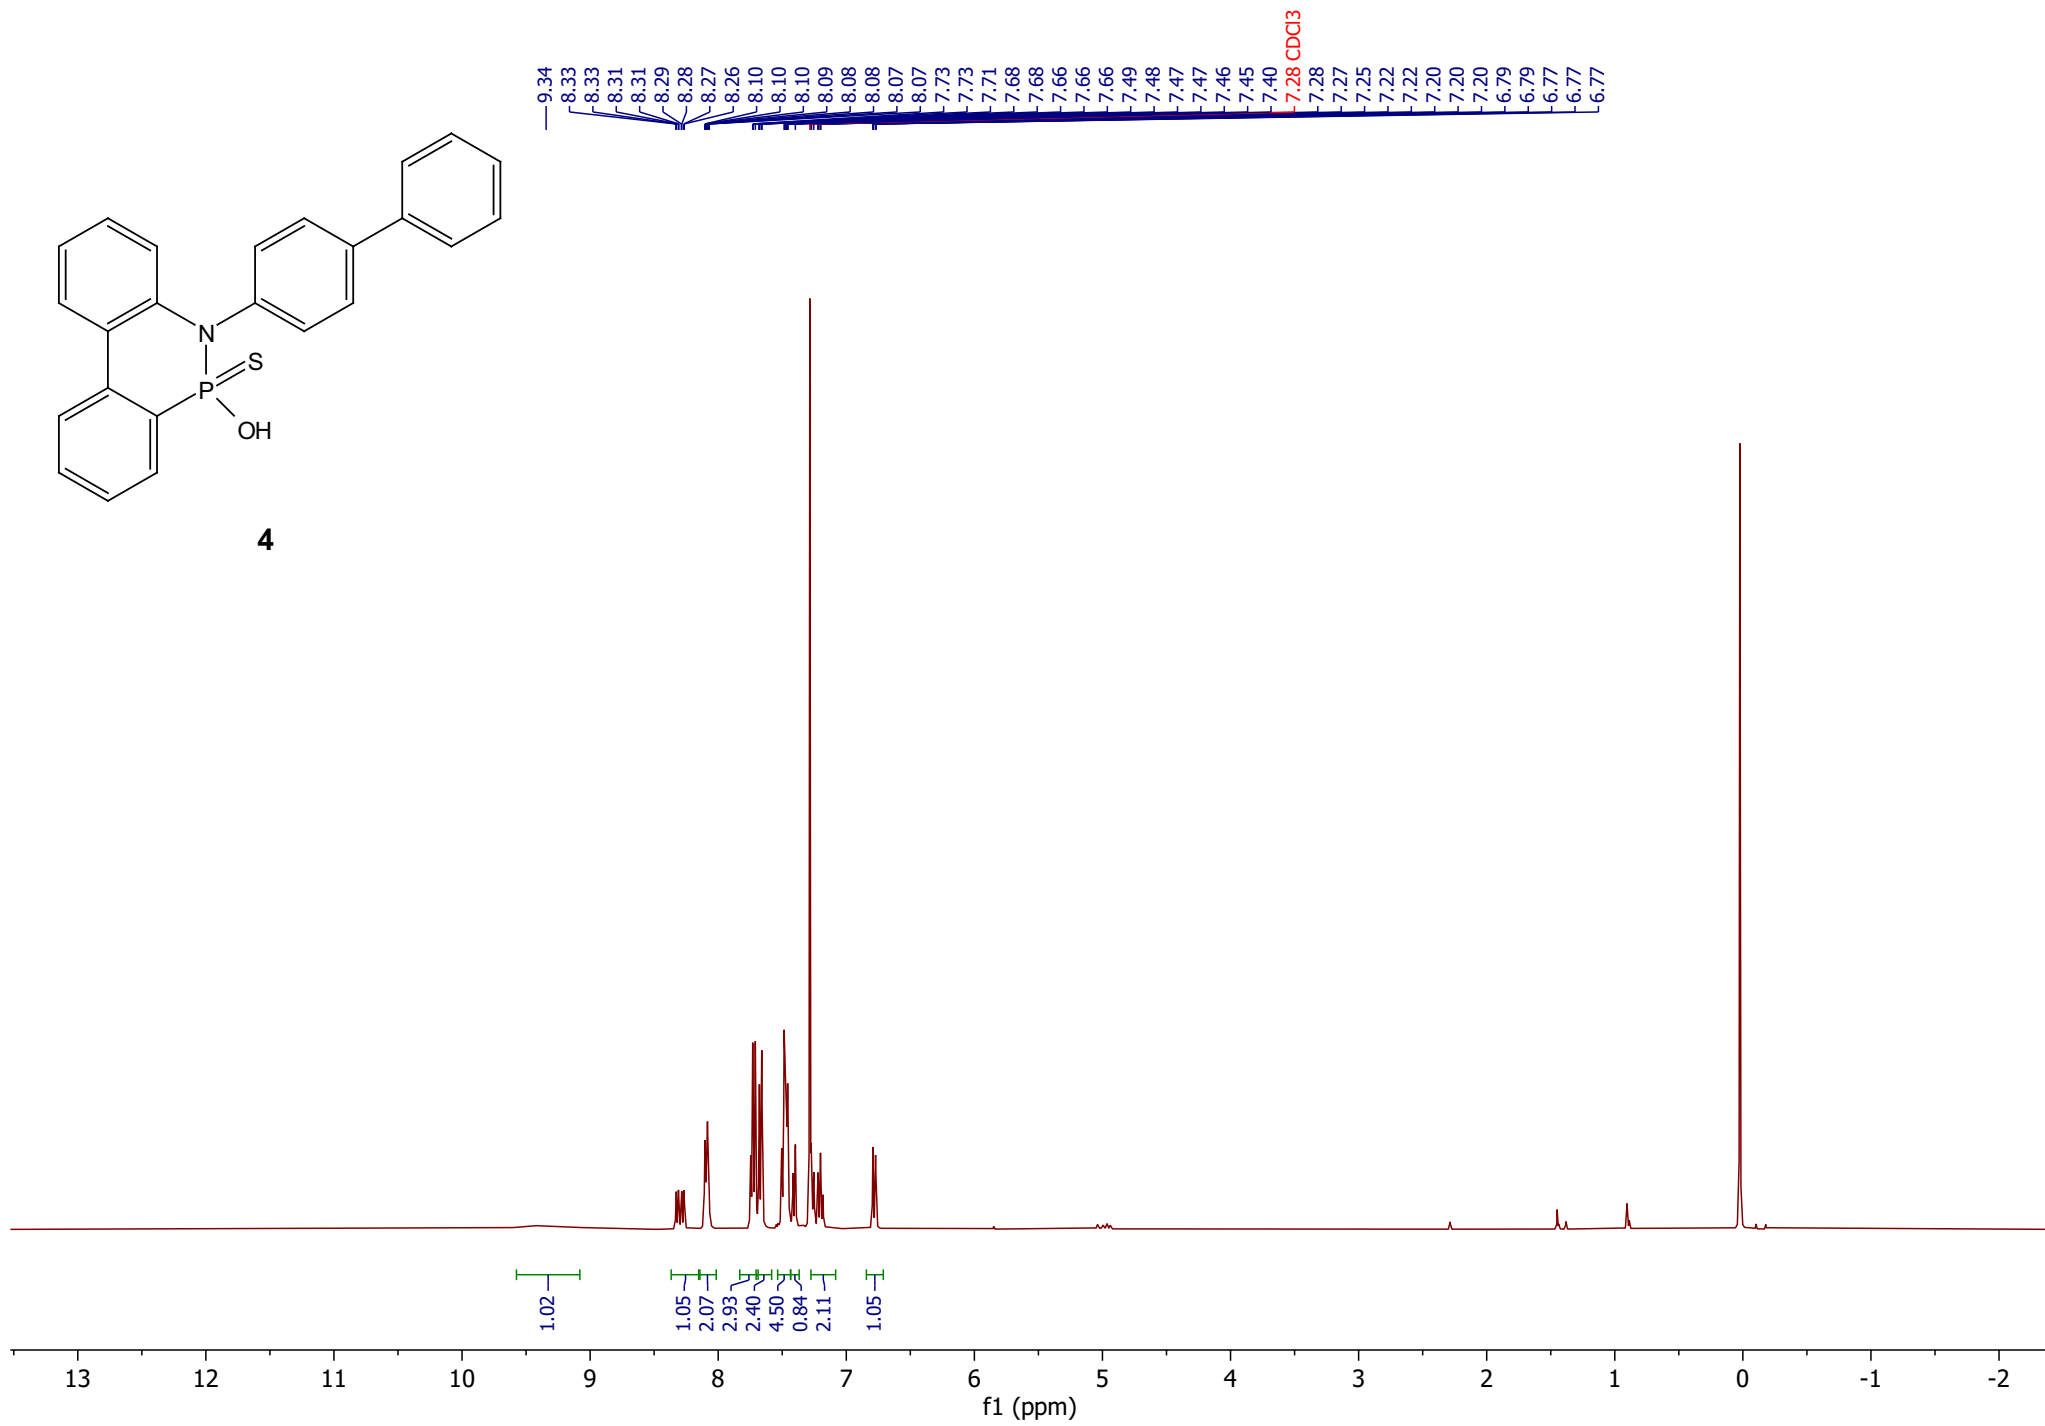

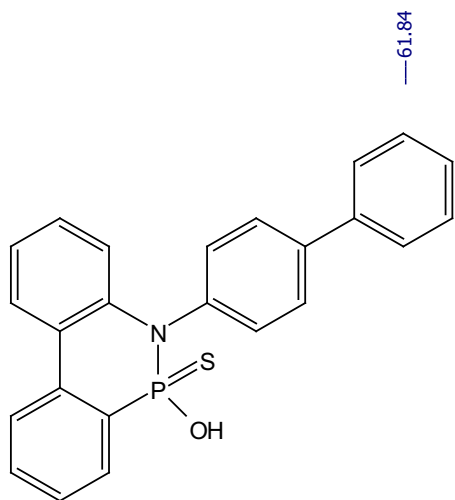

4

61.84

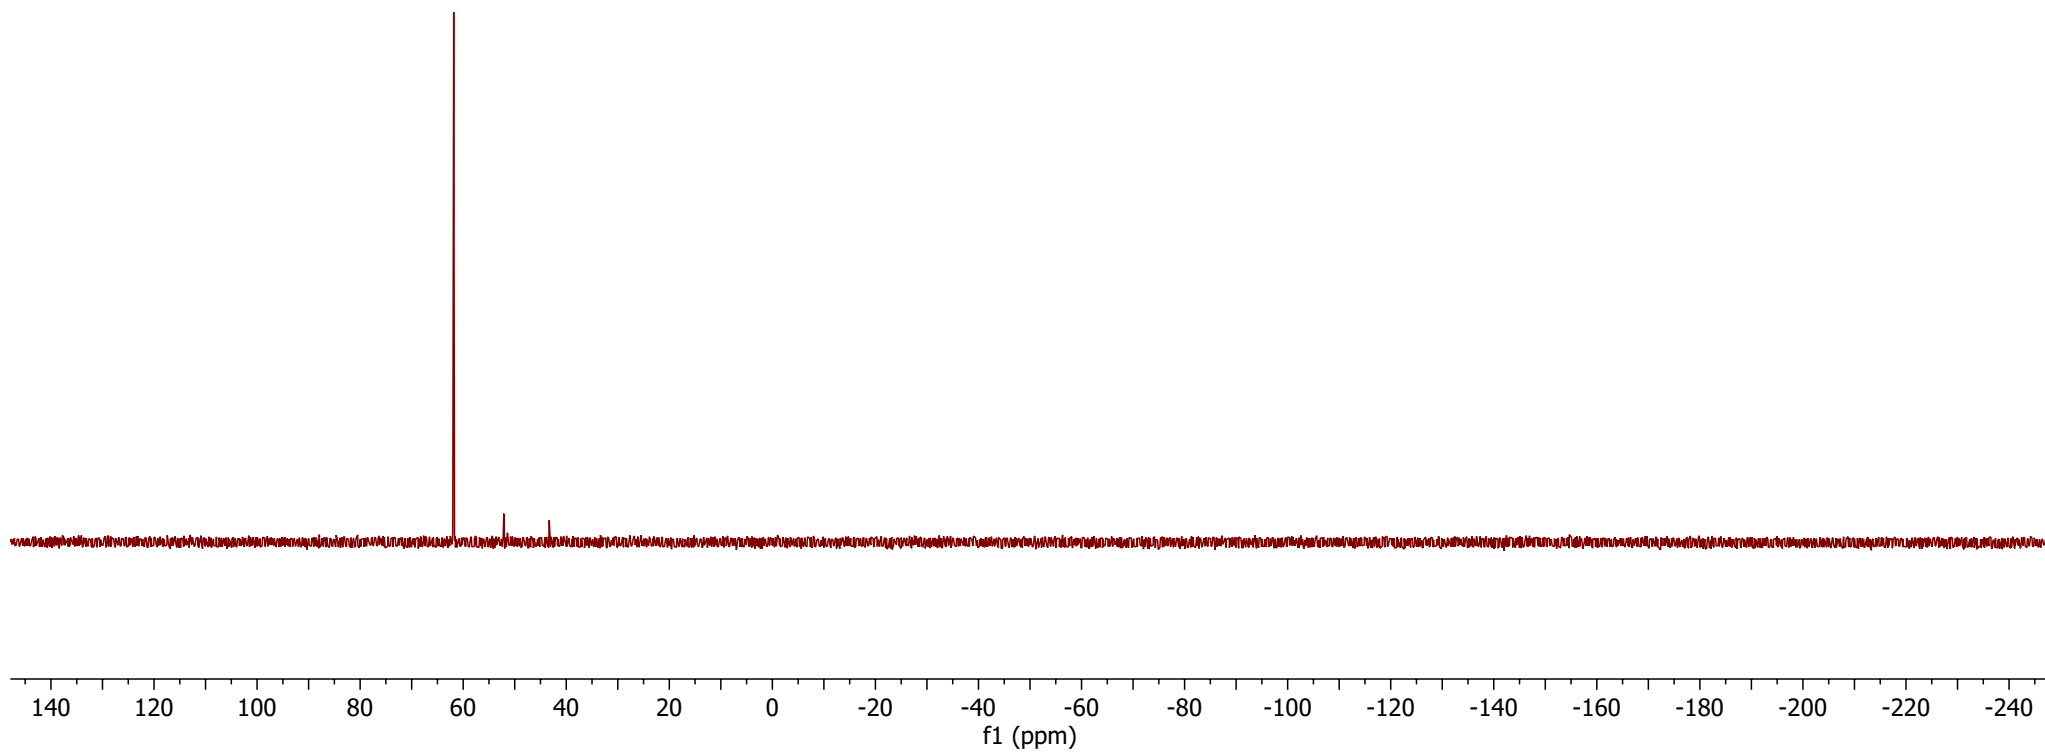

Supplement: Additional file 1 [file 1860-5397-18-154-S1.pdf]
